# Supplementary material for: PtCl4-catalyzed skeleton rearrangement–cyclization of tertiary indolyl-3-alkynols
Source: Royal Society of Chemistry journal article supplement (doi:10.1039/c7cc00352h), 2017-01-01
Supplement: c7cc00352h1.pdf [file c7cc00352h1.pdf]

# PtCl<sub>4</sub>-catalyzed Skeleton Rearrangement- Cyclization of Tertiary Indolyl-3-alkynols

Jing Zhou,<sup>†</sup> Youai Qiu,<sup>†</sup> Junzhao Li,<sup>†</sup> Chunling Fu,<sup>†</sup>

Xue Zhang,<sup>‡</sup> and Shengming Ma<sup>\*,†,‡</sup>

<sup>†</sup> Laboratory of Molecular Recognition and Synthesis, Department of Chemistry,  
Zhejiang University, Hangzhou 310027, Zhejiang, People's Republic of China

<sup>‡</sup> Shanghai Institute of Organic Chemistry, Chinese Academy of Sciences, 200032,  
Shanghai, People's Republic of China

Fax: (+86) 21-64167510; E-mail: [masm@sioc.ac.cn](mailto:masm@sioc.ac.cn)

## Supporting Information

|                                                                                  |         |
|----------------------------------------------------------------------------------|---------|
| General information                                                              | S2      |
| Experimental details and analytical data for all the products listed in the text | S3-32   |
| Computational details                                                            | S33-39  |
| References                                                                       | S40-41  |
| <sup>1</sup> H and <sup>13</sup> C NMR spectra of all compounds                  | S42-107 |

## General Information

$^1\text{H}$  and  $^{13}\text{C}$  nuclear magnetic resonance spectra were recorded with an instrument operated at 300 MHz for  $^1\text{H}$  NMR and 75 MHz for  $^{13}\text{C}$  NMR spectra.  $\text{CDCl}_3$  was used as solvent in all NMR experiments. Chemical shifts ( $\delta$ ) are given in parts per million (ppm). Infrared spectra were recorded on a FT-IR spectrometer. Mass spectra were carried out in EI mode. HRMS spectra were carried out in EI mode. Flash column chromatography was performed on silica gel.  $\text{Et}_2\text{O}$  and toluene was refluxed over sodium wire using diphenyl ketone as indicator and distilled right before use.  $\text{PtCl}_4$  was purchased from Alfa Aesar. Other reagents were used as received without further treatment.

## 1. Synthesis of starting materials 2a~2n.

The starting materials **2a~2n** were prepared according to the literatures.<sup>1</sup>

### (1) 2-(1-Ethyl-1*H*-indol-2-yl)-3,3-dimethylnon-4-yn-2-ol (**2a**) (zj-1-032, 1-036)

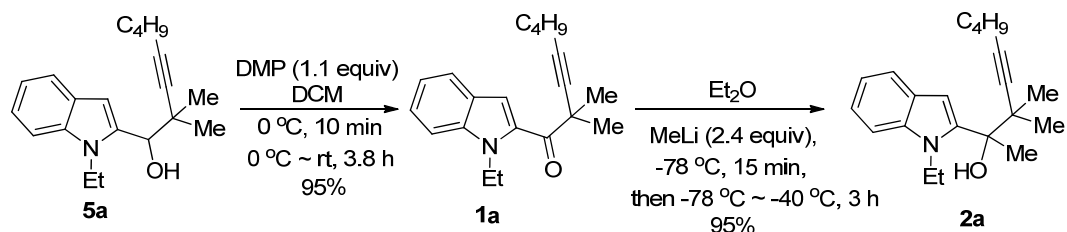

**Typical Procedure I:** To a solution of **5a**<sup>2</sup> (2.9879 g, 10.0 mmol) and DCM (80 mL) was added DMP (4.6596 g, 11.0 mmol)/DCM (20 mL) at 0 °C within 10 min. Then the mixture was allowed to warm up to room temperature. After 3.8 h, the reaction was complete as monitored by TLC, and the resulting mixture was concentrated in vacuo. Column chromatography on silica gel (eluent: petroleum ether /ethyl acetate = 50/1 ~ 30/1) afforded **1a** (2.8271 g, 95%) as a liquid, which was then submitted to next step.

To a solution of **1a** (2.0717 g, 7.0 mmol, prepared above) in diethyl ether (50 mL) was added MeLi (10.5 mL, 1.6 M in Et<sub>2</sub>O, 16.8 mmol) at -78 °C with stirring under nitrogen atmosphere within 15 min. Then the mixture was allowed to warm up to -40 °C. After 3 h, the reaction was complete as monitored by TLC, the resulting mixture was quenched with a saturated aqueous solution of NH<sub>4</sub>Cl (10 mL), extracted with diethyl ether (20 mL×3), and washed with water and brine. The combined ether layer was dried over anhydrous Na<sub>2</sub>SO<sub>4</sub>, filtration, evaporation, and column chromatography on silica gel to give **2a** (2.0793 g, 95%) (eluent: petroleum ether/ethyl acetate = 50/1) as a liquid: <sup>1</sup>H NMR (300 MHz, CDCl<sub>3</sub>) δ 7.59-7.50 (m, 1H,

ArH), 7.38-7.27 (m, 1H, ArH), 7.23-7.12 (m, 1H, ArH), 7.11-7.03 (m, 1H, ArH), 6.34 (s, 1H, ArH), 5.01-4.86 (m, 1H, one proton of NCH<sub>2</sub>), 4.34-4.16 (m, 1H, one proton of NCH<sub>2</sub>), 2.50 (s, 1H, OH), 2.22 (t, *J* = 7.1 Hz, 2H, CH<sub>2</sub>), 1.81 (s, 3H, CH<sub>3</sub>), 1.57-1.33 (m, 7H, 2 × CH<sub>2</sub> + CH<sub>3</sub>), 1.24 (s, 3H, CH<sub>3</sub>), 1.17 (s, 3H, CH<sub>3</sub>), 0.93 (t, *J* = 7.2 Hz, 3H, CH<sub>3</sub>); <sup>13</sup>C NMR (75 MHz, CDCl<sub>3</sub>) δ 139.5, 136.9, 127.2, 121.0, 120.1, 119.2, 109.6, 102.5, 85.0, 83.6, 78.5, 42.9, 41.4, 31.1, 28.7, 25.9, 25.5, 22.0, 18.4, 15.7, 13.6; IR (neat) ν (cm<sup>-1</sup>) 3540, 3047, 2961, 2933, 2872, 2231, 1463, 1371, 1344, 1311, 1225, 1181, 1133, 1108, ; MS (70 ev, EI) *m/z* (%) 312 (M<sup>+</sup>+1, 7.88), 311 (M<sup>+</sup>, 21.69), 188 (100), 146 (100); HRMS Calcd for C<sub>21</sub>H<sub>29</sub>NO (M<sup>+</sup>): 311.2249, Found: 311.2248.

The following compounds **2b~2l** were prepared according to **Typical Procedure**

## I.

### (2) 3,3-Dimethyl-2-(1-methyl-1*H*-indol-2-yl)non-4-yn-2-ol (**2b**) (zj-1-100, 1-112)

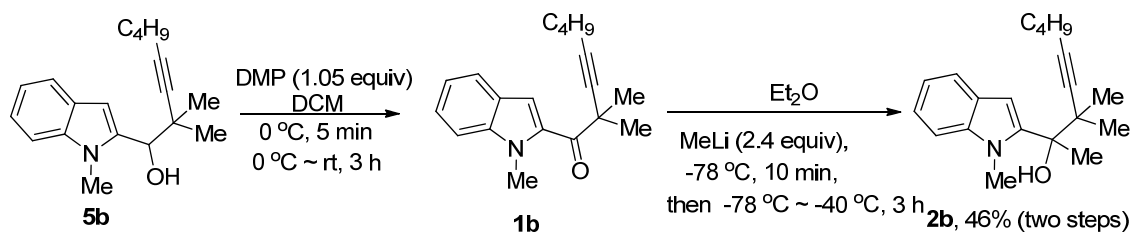

The reaction of **5b** (3.0077 g, 11.0 mmol), DMP (4.8925 g, 11.5 mmol)/DCM (20 mL), and DCM (80 mL) afforded **1b** (1.9562 g) (eluent: petroleum ether/ethyl acetate = 100/1~50/1) as a liquid.

The reaction of **1b** (1.9518 g, 7 mmol, prepared above)/diethyl ether (30 mL) and

MeLi (10.5 mL, 1.6 M in Et<sub>2</sub>O, 16.8 mmol) afforded **2b** (1.4647 g, 46%, two steps) (eluent: petroleum ether/ethyl acetate = 100/1~50/1) as a liquid: <sup>1</sup>H NMR (300 MHz, CDCl<sub>3</sub>) δ 7.53 (d, *J* = 7.5 Hz, 1H, ArH), 7.28 (d, *J* = 8.1 Hz, 1H, ArH), 7.18 (t, *J* = 7.7 Hz, 1H, ArH), 7.07 (t, *J* = 7.4 Hz, 1H, ArH), 6.38 (s, 1H, ArH), 4.04 (s, 3H, NCH<sub>3</sub>), 2.54 (s, 1H, OH), 2.21 (t, *J* = 6.8 Hz, 2H, CH<sub>2</sub>), 1.80 (s, 3H, CH<sub>3</sub>), 1.57-1.33 (m, 4H, 2 × CH<sub>2</sub>), 1.24 (s, 3H, CH<sub>3</sub>), 1.19 (s, 3H, CH<sub>3</sub>), 0.92 (t, *J* = 7.1 Hz, 3H, CH<sub>3</sub>); <sup>13</sup>C NMR (75 MHz, CDCl<sub>3</sub>) δ 140.1, 138.3, 126.8, 121.1, 120.0, 119.3, 109.3, 102.7, 85.0, 83.7, 78.5, 43.0, 33.4, 31.1, 28.4, 26.0, 25.6, 22.0, 18.4, 13.6; IR (neat) ν (cm<sup>-1</sup>) 3539, 2957, 2933, 2872, 2230, 1469, 1371, 1358, 1316, 1236, 1176, 1143, 1104, 1055, 1010; MS (70 ev, EI) *m/z* (%) 298 (M<sup>+</sup>+1, 4.60), 297 (M<sup>+</sup>, 11.30), 174 (100), 132 (100); HRMS Calcd for C<sub>20</sub>H<sub>27</sub>NO (M<sup>+</sup>): 297.2093, Found: 297.2098.

**(3) 2-(1-Benzyl-1*H*-indol-2-yl)-3,3-dimethylnon-4-yn-2-ol (2c) (qya-9-062, 9-068)**

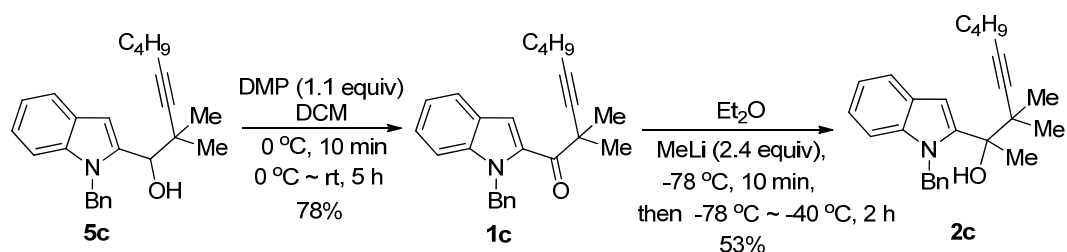

The reaction of **5c** (2.1567 g, 6 mmol), DMP (2.8027 g, 6.6 mmol)/DCM (20 mL), and DCM (80 mL) afforded **1c** (1.6708 g, 78%) (eluent: petroleum ether/ethyl acetate = 50/1~30/1) as a liquid.

The reaction of **1c** (1.4280 g, 4 mmol, prepared above)/diethyl ether (25 mL) and MeLi (6.0 mL, 1.6 M in Et<sub>2</sub>O, 9.6 mmol) afforded **2c** (0.7915 g, 53%) (eluent: petroleum ether/ethyl acetate = 20/1) as a liquid: <sup>1</sup>H NMR (300 MHz, CDCl<sub>3</sub>) δ 7.63-7.51 (m, 1H, ArH), 7.27-7.00 (m, 6H, ArH), 6.98-6.86 (m, 2H, ArH), 6.49 (s, 1H,

ArH), 6.33 (d,  $J = 16.5$  Hz, 1H, one proton of NCH<sub>2</sub>), 5.38 (d,  $J = 17.1$  Hz, 1H, one proton of NCH<sub>2</sub>), 2.36 (s, 1H, OH), 2.19 (t,  $J = 6.9$  Hz, 2H, CH<sub>2</sub>), 1.82 (s, 3H, CH<sub>3</sub>), 1.54-1.33 (m, 4H, 2 × CH<sub>2</sub>), 1.29 (s, 3H, CH<sub>3</sub>), 1.23 (s, 3H, CH<sub>3</sub>), 0.91 (t,  $J = 6.9$  Hz, 3H, CH<sub>3</sub>); <sup>13</sup>C NMR (75 MHz, CDCl<sub>3</sub>) δ 140.4, 139.8, 137.7, 128.4, 127.1, 126.5, 125.6, 121.4, 120.0, 119.6, 110.3, 103.0, 85.1, 83.4, 78.5, 49.9, 42.6, 31.1, 28.7, 25.8, 25.6, 22.0, 18.4, 13.6; IR (neat)  $\nu$  (cm<sup>-1</sup>) 3540, 3057, 3030, 2957, 2931, 2872, 2242, 1496, 1463, 1453, 1371, 1347, 1313, 1252, 1212, 1171, 1142, 1111, 1093, 1066, 1029, 1016; MS (70 ev, EI)  $m/z$  (%) 373 (M<sup>+</sup>, 5.03), 91 (100); HRMS Calcd for C<sub>26</sub>H<sub>31</sub>NO (M<sup>+</sup>): 373.2406, Found: 373.2404.

**(4) 2-(1-Ethyl-1*H*-indol-2-yl)-3,3-dimethyloct-4-yn-2-ol (2d) (zj-1-069, 1-087)**

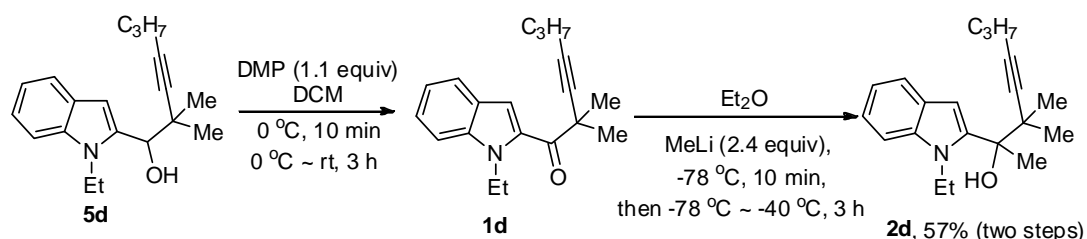

The reaction of **5d** (3.5406 g, 12.5 mmol), DMP (5.8378 g, 13.8 mmol)/DCM (25 mL), and DCM (75 mL) afforded crude **1d** (2.4774 g) (eluent: petroleum ether/ethyl acetate = 100/1~50/1) as a liquid.

The reaction of **1d** (2.4046 g, 8.6 mmol, prepared above)/diethyl ether (50 mL) and MeLi (13.0 mL, 1.6 M in Et<sub>2</sub>O, 20.6 mmol) afforded **2d** (2.0387 g, 57%, two steps) (eluent: petroleum ether ~ petroleum ether/ethyl acetate = 100/1 for the first round afforded 0.5413 g of pure **2d** and 1.5478 g of impure **2d**, which was further purified by chromatography on silica gel (eluent: petroleum ether ~ ether/ethyl acetate = 100/1 ) to afford **2d** 1.4974 g, combined weight 2.0387 g as a liquid: <sup>1</sup>H NMR (300

MHz, CDCl<sub>3</sub>)  $\delta$  7.54 (d,  $J$  = 8.1 Hz, 1H, ArH), 7.32 (d,  $J$  = 7.5 Hz, 1H, ArH), 7.17 (t,  $J$  = 7.7 Hz, 1H, ArH), 7.07 (t,  $J$  = 7.4 Hz, 1H, ArH), 6.34 (s, 1H, ArH), 5.02-4.86 (m, 1H, one proton of NCH<sub>2</sub>), 4.36-4.18 (m, 1H, one proton of NCH<sub>2</sub>), 2.49 (s, 1H, OH), 2.20 (t,  $J$  = 7.1 Hz, 2H, CH<sub>2</sub>), 1.81 (s, 3H, CH<sub>3</sub>), 1.63-1.47 (m, 2H, CH<sub>2</sub>), 1.38 (t,  $J$  = 6.9 Hz, 3H, CH<sub>3</sub>), 1.25 (s, 3H, CH<sub>3</sub>), 1.18 (s, 3H, CH<sub>3</sub>), 1.00 (t,  $J$  = 7.4 Hz, 3H, CH<sub>3</sub>); <sup>13</sup>C NMR (75 MHz, CDCl<sub>3</sub>)  $\delta$  139.6, 136.9, 127.2, 121.0, 120.1, 119.2, 109.6, 102.6, 85.3, 83.5, 78.5, 42.9, 41.4, 28.7, 25.9, 25.6, 22.4, 20.7, 15.6, 13.5; IR (neat)  $\nu$  (cm<sup>-1</sup>) 3546, 3046, 2967, 2933, 2872, 2186, 1461, 1371, 1344, 1310, 1275, 1225, 1180, 1133, 1108, 1096; MS (70 ev, EI)  $m/z$  (%) 298 (M<sup>+</sup>+1, 5.82), 297 (M<sup>+</sup>, 15.90), 188 (100), 188 (100), 146 (100); HRMS Calcd for C<sub>20</sub>H<sub>27</sub>NO (M<sup>+</sup>): 297.2093, Found: 297.2095.

**(5) 2-(1-Ethyl-5-methyl-1*H*-indol-2-yl)-3,3-dimethylnon-4-yn-2-ol (2e)**

**(zj-1-010,1-012)**

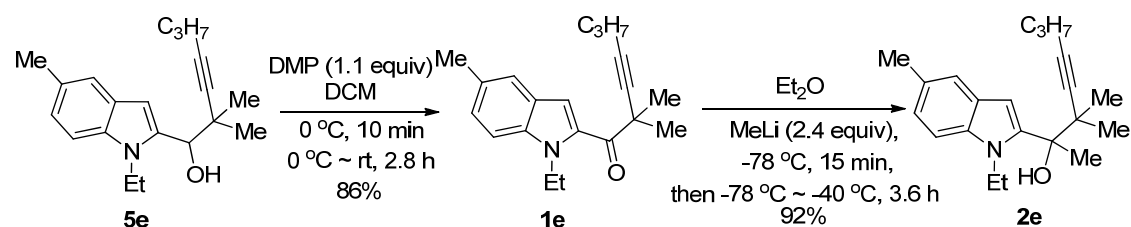

The reaction of **5e** (2.1125 g, 7.1 mmol), DMP (3.3165 g, 7.8 mmol)/DCM (20 mL), and DCM (80 mL) afforded **1e** (1.7911 g, 86%) (eluent: petroleum ether/ethyl acetate = 100/1~50/l) as a liquid.

The reaction of **1e** (1.5293 g, 5.2 mmol, prepared above)/diethyl ether (50 mL) and MeLi (4.2 mL, 3.0 M in Et<sub>2</sub>O, 12.6 mmol) afforded **2e** (1.4814 g, 92%,) (eluent: petroleum ether/ethyl acetate = 30/l) as a liquid: <sup>1</sup>H NMR (300 MHz, CDCl<sub>3</sub>)  $\delta$  7.33 (s, 1H, ArH), 7.20 (d,  $J$  = 8.4 Hz, 1H, ArH), 6.99 (d,  $J$  = 8.4 Hz, 1H, ArH), 6.24 (s, 1H,

ArH), 4.98-4.82 (m, 1H, one proton of NCH<sub>2</sub>), 4.30-4.13 (m, 1H, one proton of NCH<sub>2</sub>), 2.49 (s, 1H, OH), 2.43 (s, 3H, CH<sub>3</sub>), 2.18 (t, *J* = 7.1 Hz, 2H, CH<sub>2</sub>), 1.79 (s, 3H, CH<sub>3</sub>), 1.61-1.42 (m, 2H, CH<sub>2</sub>), 1.35 (t, *J* = 7.1 Hz, 3H, CH<sub>3</sub>), 1.23 (s, 3H, CH<sub>3</sub>), 1.16 (s, 3H, CH<sub>3</sub>), 0.99 (t, *J* = 7.4 Hz, 3H, CH<sub>3</sub>); <sup>13</sup>C NMR (75 MHz, CDCl<sub>3</sub>) δ 139.4, 135.3, 128.3, 127.4, 122.5, 119.7, 109.3, 102.0, 85.3, 83.4, 78.4, 42.9, 41.4, 28.6, 25.8, 25.5, 22.4, 21.3, 20.7, 15.7, 13.5; IR (neat) ν (cm<sup>-1</sup>) 3543, 2967, 2933, 2871, 2221, 1478, 1463, 1370, 1336, 1320, 1298, 1275, 1190, 1229, 1159, 1139, 1112, 1096, 1079, 1056, 1004; MS (70 ev, EI) *m/z* (%) 312 (M<sup>+</sup>+1, 6.02), 311 (M<sup>+</sup>, 16.56), 202 (100), 160 (100); HRMS Calcd for C<sub>21</sub>H<sub>29</sub>NO (M<sup>+</sup>): 311.2249, Found: 311.2247.

**(6) 2-(1-Ethyl-5-methyl-1*H*-indol-2-yl)-3,3-dimethyl-5-phenylpent-4-yn-2-ol (2f)**  
**(qya-9-127, 9-132)**

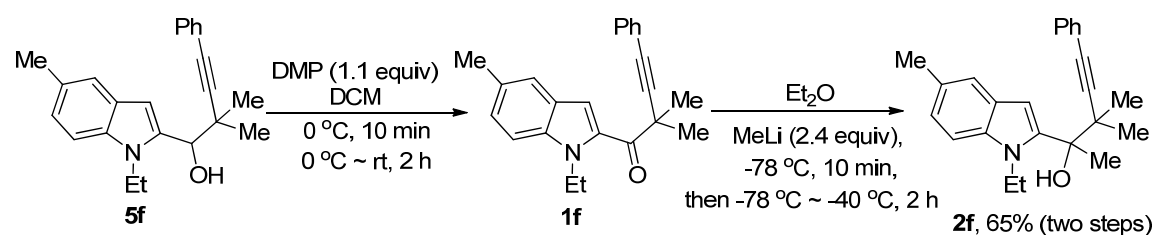

The reaction of **5f** (1.2916 g, 3.9 mmol), DMP (1.8213 g, 4.3 mmol)/DCM (10 mL), and DCM (50 mL) afforded crude **1f** (1.0625 g,) (eluent: petroleum ether/ethyl acetate = 100/1~50/1) as a liquid.

The reaction of **1f** (1.0513 g, 3.2 mmol, prepared above)/diethyl ether (20 mL) and MeLi (4.8 mL, 1.6 M in Et<sub>2</sub>O, 7.7 mmol) afforded **2f** (0.8625 g, 65%, two steps) (eluent: petroleum ether/ethyl acetate = 50/1) as a solid; m.p. 104.9~106.2 °C (*n*-hexane/ethyl acetate); <sup>1</sup>H NMR (300 MHz, CDCl<sub>3</sub>) δ 7.51-7.15 (m, 7H, ArH), 7.07-6.96 (m, 1H, ArH), 6.32 (d, *J* = 1.8 Hz, 1H, ArH), 5.04-4.82 (m, 1H, one proton



of NCH<sub>2</sub>), 4.35-4.16 (m, 1H, one proton of NCH<sub>2</sub>), 2.44 (s, 3H, CH<sub>3</sub>), 2.34 (s, 1H, OH), 1.89 (d, *J* = 1.8 Hz, 3H, CH<sub>3</sub>), 1.44-1.19 (m, 9H, 3 × CH<sub>3</sub>); <sup>13</sup>C NMR (75 MHz, CDCl<sub>3</sub>) δ 139.6, 135.5, 131.6, 128.5, 128.3, 128.0, 127.5, 123.4, 122.8, 119.9, 109.4, 102.2, 95.0, 83.4, 78.7, 43.3, 41.4, 28.7, 25.7, 25.3, 21.3, 15.7; IR (KBr) ν (cm<sup>-1</sup>) 3554, 2977, 2935, 2866, 2218, 1597, 1477, 1459, 1371, 1335, 1298, 1269, 1229, 1191, 1136, 1107; MS (70 ev, EI) *m/z* (%) 346 (M<sup>+</sup>+1, 6.61), 345 (M<sup>+</sup>, 15.62), 202 (100), 160 (100); Elemental analysis calcd (%) for C<sub>24</sub>H<sub>27</sub>NO: C, 83.44; H, 7.88; N, 4.05; Found: C, 83.46, H, 8.06; N, 3.80.

**(7) 2-(1-Ethyl-5-methyl-1*H*-indol-2-yl)-3,3-dimethylnon-4-yn-2-ol (2g) (zj-1-023, 1-024)**

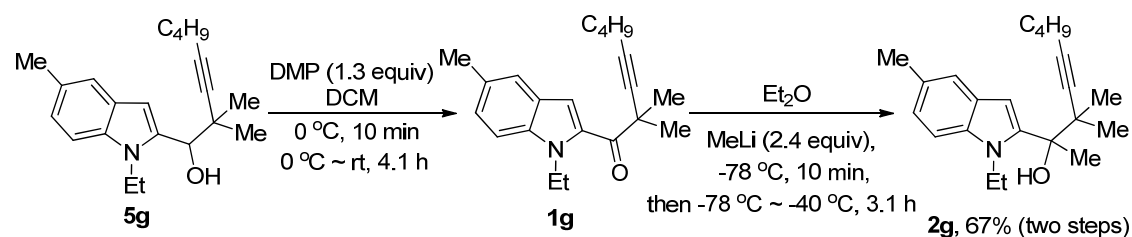

The reaction of **5g** (1.2536 g, 4.0 mmol), DMP (2.1553 g, 5.1 mmol)/DCM (20 mL), and DCM (80 mL) afforded crude **1g** (0.9215 g) (eluent: petroleum ether/ethyl acetate = 50/1~30/1) as a liquid.

The reaction of **1g** (0.8840 g, 2.9 mmol, prepared above)/diethyl ether (30 mL), and MeLi (4.4 mL, 1.6 M in Et<sub>2</sub>O, 7.0 mmol) afforded **2g** (0.8362 g, 67%, two steps) (eluent: petroleum ether/ethyl acetate = 50/1~30/1) as a liquid: <sup>1</sup>H NMR (300 MHz, CDCl<sub>3</sub>) δ 7.36-7.30 (m, 1H, ArH), 7.21 (d, *J* = 8.4 Hz, 1H, ArH), 7.00 (d, *J* = 8.4, 1H, ArH), 6.24 (s, 1H, ArH), 4.99-4.83 (m, 1H, one proton of NCH<sub>2</sub>), 4.30-4.15 (m, 1H, one proton of NCH<sub>2</sub>), 2.49 (s, 1H, OH), 2.43 (s, 3H, CH<sub>3</sub>), 2.21 (t, *J* = 7.1 Hz, 2H,

CH<sub>2</sub>), 1.79 (s, 3H, CH<sub>3</sub>), 1.57-1.30 (m, 7H, 2 × CH<sub>2</sub> + CH<sub>3</sub>), 1.23 (s, 3H, CH<sub>3</sub>), 1.16 (s, 3H, CH<sub>3</sub>), 0.93 (t, *J* = 7.4 Hz, 3H, CH<sub>3</sub>); <sup>13</sup>C NMR (75 MHz, CDCl<sub>3</sub>) δ 139.4, 135.3, 128.4, 127.4, 122.6, 119.7, 109.3, 102.0, 85.1, 83.6, 78.5, 42.9, 41.4, 31.1, 28.7, 25.9, 25.5, 22.0, 21.3, 18.4, 15.7, 13.6; IR (neat) ν (cm<sup>-1</sup>) 3546, 2961, 2932, 2871, 2230, 1477, 1459, 1370, 1335, 1298, 1229, 1189, 1138, 1111, 1096; MS (70 ev, EI) *m/z* (%) 326 (M<sup>+</sup>+1, 11.07), 325 (M<sup>+</sup>, 13.79), 202 (100), 160 (100); HRMS Calcd for C<sub>22</sub>H<sub>31</sub>NO (M<sup>+</sup>): 325.2406, Found: 325.2404.

**(8) 2-(1-Benzyl-5-bromo-1*H*-indol-2-yl)-3,3-dimethylnon-4-yn-2-ol (2h) (zj-1-055, 1-056)**

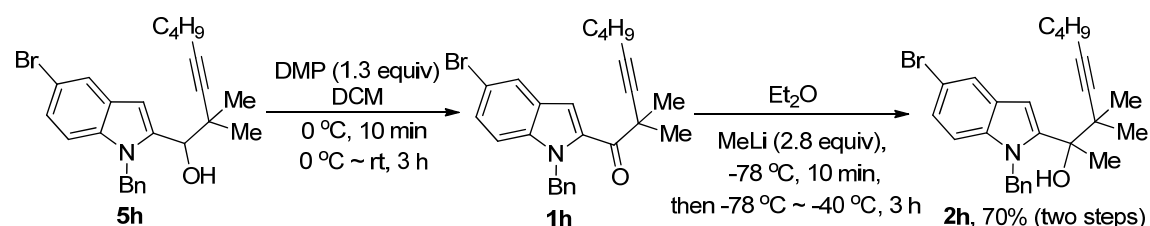

The reaction of **5h** (2.8472 g, 6.5 mmol), DMP (3.5460 g, 8.4 mmol)/DCM (20 mL), and DCM (80 mL) afforded crude **1h** (2.0670 g) (eluent: petroleum ether/ethyl acetate = 50/1~30/1) as a liquid.

The reaction of **1h** (2.0343 g, 4.7 mmol, prepared above)/diethyl ether (50 mL) and MeLi (8.2 mL, 1.6 M in Et<sub>2</sub>O, 13.1 mmol) afforded **2h** (2.0169 g, 70%, two steps) (eluent: petroleum ether/ethyl acetate = 50/1~30/1) as a liquid: <sup>1</sup>H NMR (300 MHz, CDCl<sub>3</sub>) δ 7.68 (s, 1H, ArH), 7.26-7.09 (m, 4H, ArH), 6.97 (d, *J* = 8.7 Hz, 1H, ArH), 6.94-6.85 (m, 2H, ArH), 6.42 (s, 1H, ArH), 6.32 (d, *J* = 16.5 Hz, 1H, one proton of NCH<sub>2</sub>), 5.33 (d, *J* = 16.5 Hz, 1H, one proton of NCH<sub>2</sub>), 2.34 (s, 1H, OH), 2.19 (t, *J* =

6.9 Hz, 2H, CH<sub>2</sub>), 1.80 (s, 3H, CH<sub>3</sub>), 1.55-1.33 (m, 4H, 2 × CH<sub>2</sub>), 1.27 (s, 3H, CH<sub>3</sub>), 1.21 (s, 3H, CH<sub>3</sub>), 0.91 (t, *J* = 7.2 Hz, 3H, CH<sub>3</sub>); <sup>13</sup>C NMR (75 MHz, CDCl<sub>3</sub>) δ 142.0, 139.4, 136.4, 128.8, 128.5, 126.7, 125.6, 124.2, 122.5, 112.9, 111.8, 102.5, 84.9, 83.7, 78.5, 50.1, 42.7, 31.1, 28.6, 25.8, 25.6, 22.0, 18.4, 13.6; IR (neat) ν (cm<sup>-1</sup>) 3537, 3060, 3027, 2956, 2931, 2871, 2227, 1604, 1496, 1463, 1382, 1370, 1328, 1314, 1271, 1207, 1171, 1144, 1105, 1055, 1029; MS (70 ev, EI) *m/z* (%) 453 (M(<sup>81</sup>Br)<sup>+</sup>, 5.31), 451 (M(<sup>79</sup>Br)<sup>+</sup>, 5.22), 91 (100); HRMS Calcd for C<sub>26</sub>H<sub>30</sub>NO<sup>79</sup>Br (M<sup>+</sup>): 451.1511, Found: 451.1508.

**(9) 2-(1-Ethyl-6-methyl-1*H*-indol-2-yl)-3,3-dimethylnon-4-yn-2-ol (2i) (zj-1-089, 1-108)**

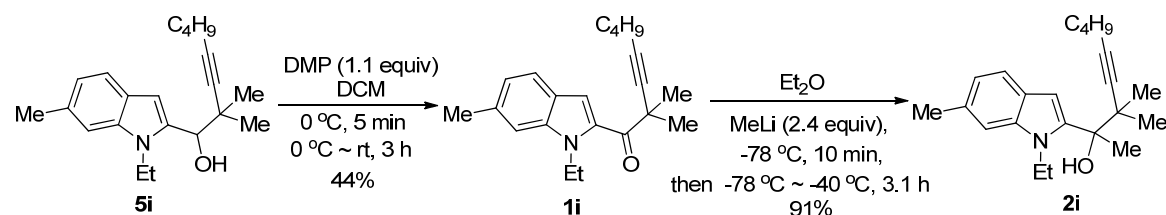

The reaction of **5i** (3.4728 g, 11.2 mmol), DMP (5.2395 g, 12.4 mmol)/DCM (25 mL), and DCM (75 mL) afforded **1i** (1.5249 g, 44%) (eluent: petroleum ether ~ petroleum ether/ethyl acetate = 100/1) as a liquid.

The reaction of **1i** (1.4329 g, 4.6 mmol, prepared above)/diethyl ether (30 mL) and MeLi (6.9 mL, 1.6 M in Et<sub>2</sub>O, 11.0 mmol) afforded **2i** (1.3653 g, 91%) (eluent: petroleum ether/ethyl acetate = 50/1~30/1) as a solid; m.p. 78.1~79.3 °C (*n*-hexane/diethyl ether): <sup>1</sup>H NMR (300 MHz, CD<sub>3</sub>COCD<sub>3</sub>) δ 7.35 (d, *J* = 7.8 Hz, 1H, ArH), 7.16 (s, 1H, ArH), 6.83 (d, *J* = 7.2 Hz, 1H, ArH), 6.33 (s, 1H, ArH), 5.08-4.92 (m, 1H, one proton of NCH<sub>2</sub>), 4.32-4.20 (m, 1H, one proton of NCH<sub>2</sub>), 4.19 (s, 1H,

OH), 2.43 (s, 3H, CH<sub>3</sub>), 2.18 (t, *J* = 6.6 Hz, 2H, CH<sub>2</sub>), 1.82 (s, 3H, CH<sub>3</sub>), 1.52-1.35 (m, 4H, 2 × CH<sub>2</sub>), 1.32 (t, *J* = 7.1 Hz, 3H, CH<sub>3</sub>), 1.26 (s, 3H, CH<sub>3</sub>), 1.21 (s, 3H, CH<sub>3</sub>), 0.90 (t, *J* = 7.2 Hz, 3H, CH<sub>3</sub>); <sup>13</sup>C NMR (75 MHz, CD<sub>3</sub>COCD<sub>3</sub>) δ 142.0, 138.2, 130.8, 126.4, 121.5, 120.6, 110.4, 102.7, 87.3, 82.6, 78.6, 42.7, 41.7, 31.9, 28.4, 26.5, 26.3, 22.6, 22.1, 19.0, 15.9, 13.9; IR (KBr) ν (cm<sup>-1</sup>) 3542, 3024, 2961, 2932, 2872, 2227, 1617, 1521, 1489, 1467, 1371, 1339, 1311, 1269, 1225, 1180, 1139, 1105, 1058; MS (70 ev, EI) *m/z* (%) 326 (M<sup>+</sup>+1, 3.06), 325 (M<sup>+</sup>, 7.27), 202 (100), 160 (100); Elemental analysis calcd (%) for C<sub>22</sub>H<sub>31</sub>NO: C, 81.18; H, 9.60; N, 4.30; Found: C, 81.24; H, 9.53; N, 4.11.

**(10) 2-(1-Ethyl-7-methyl-1*H*-indol-2-yl)-3,3-dimethylnon-4-yn-2-ol (2j) (zj-1-046, 1-049)**

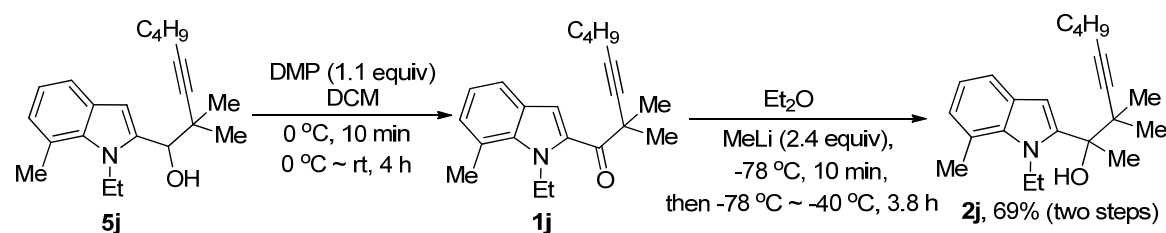

The reaction of **5j** (4.1782 g, 13.4 mmol), DMP (6.3333 g, 14.9 mmol)/DCM (20 mL), and DCM (80 mL) afforded crude **1j** (3.0237 g) (eluent: petroleum ether/ethyl acetate = 100/1~50/l) as a liquid.

The reaction of **1j** (2.9784 g, 9.6 mmol, prepared above)/diethyl ether (50 mL) and MeLi (14.5 mL, 1.6 M in Et<sub>2</sub>O, 23.2 mmol) afforded **2j** (2.9697 g, 69%, two steps) (eluent: petroleum ether/ethyl acetate = 50/l) as a liquid: <sup>1</sup>H NMR (300 MHz, CDCl<sub>3</sub>) δ 7.40 (dd, *J*<sub>1</sub> = 7.5 and *J*<sub>2</sub> = 0.6 Hz, 1H, ArH), 6.95 (t, *J* = 7.4 Hz, 1H, ArH), 6.89 (dd,

$J_1 = 7.4$  and  $J_2 = 0.6$  Hz, 1H, ArH), 6.38 (s, 1H, ArH), 5.28-4.90 (m, 1H, one proton of NCH<sub>2</sub>), 4.63-4.43 (m, 1H, one proton of NCH<sub>2</sub>), 2.75 (s, 3H, CH<sub>3</sub>), 2.48 (s, 1H, OH), 2.22 (t,  $J = 6.9$  Hz, 2H, CH<sub>2</sub>), 1.83 (s, 3H, CH<sub>3</sub>), 1.55-1.38 (m, 4H, 2 × CH<sub>2</sub>), 1.29 (t,  $J = 6.9$  Hz, 3H, CH<sub>3</sub>), 1.23 (s, 3H, CH<sub>3</sub>), 1.19 (s, 3H, CH<sub>3</sub>), 0.93 (t,  $J = 7.2$  Hz, 3H, CH<sub>3</sub>); <sup>13</sup>C NMR (75 MHz, CDCl<sub>3</sub>) δ 139.2, 136.1, 128.3, 125.0, 120.8, 119.4, 118.5, 104.6, 85.2, 83.6, 78.6, 43.0, 42.5, 31.1, 28.6, 26.0, 25.5, 22.0, 20.8, 18.4, 18.0, 13.6; IR (neat) ν (cm<sup>-1</sup>) 3546, 3043, 2960, 2931, 2872, 2230, 1486, 1459, 1409, 1371, 1319, 1303, 1237, 1177, 1141, 1109, 1093, 1049; MS (70 ev, EI)  $m/z$  (%) 325 (M<sup>+</sup>, 3.52), 202 (100); HRMS Calcd for C<sub>22</sub>H<sub>31</sub>NO (M<sup>+</sup>): 325.2406, Found: 325.2408.

**(11) 1-(1-Ethyl-1*H*-indol-2-yl)-3,3-pentamethylenon-4-yn-2-ol (2k) (zj-1-072, 1-173)**

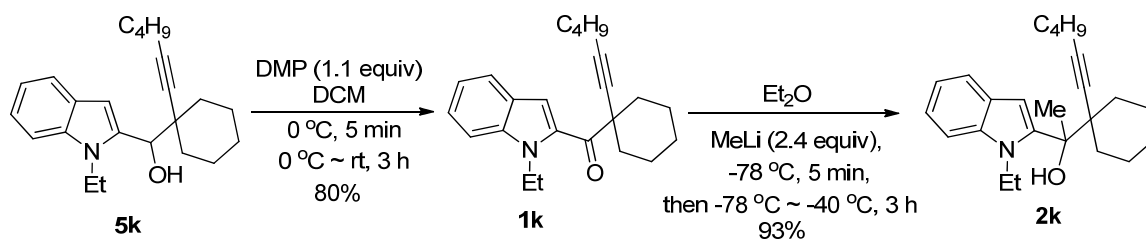

The reaction of **5k** (1.7757 g, 5.3 mmol), DMP (2.5471 g, 6.0 mmol)/DCM (15 mL), and DCM (60 mL) afforded **1k** (1.4110 g, 80%) (eluent: petroleum ether/ethyl acetate = 100/1~50/l) as a liquid.

The reaction of **1k** (1.2480 g, 3.7 mmol, prepared above)/diethyl ether (30 mL) and MeLi (3.0 mL, 3.0 M in Et<sub>2</sub>O, 9.0 mmol) afforded **2k** (1.2188 g, 93%) (eluent: petroleum ether/ethyl acetate = 100/1~50/l) as a liquid: <sup>1</sup>H NMR (300 MHz, CDCl<sub>3</sub>) δ 7.55 (d,  $J = 7.5$  Hz, 1H, ArH), 7.33 (d,  $J = 7.8$  Hz, 1H, ArH), 7.23-7.13 (m, 1H, ArH),

7.12-7.02 (m, 1H, ArH), 6.29 (s, 1H, ArH), 5.02-4.82 (m, 1H, one proton of NCH<sub>2</sub>), 4.33-4.10 (m, 1H, one proton of NCH<sub>2</sub>), 2.61 (s, 1H, OH), 2.27 (t, *J* = 6.9 Hz, 2H, CH<sub>2</sub>), 2.13-1.96 (m, 1H, one proton of CH<sub>2</sub>), 1.78 (s, 3H, CH<sub>3</sub>), 1.84-1.67 (m, 1H, one proton of CH<sub>2</sub>), 1.66-1.31 (m, 13H, 5 × CH<sub>2</sub> + CH<sub>3</sub>), 1.01-0.69 (m, 5H, CH<sub>2</sub> + CH<sub>3</sub>); <sup>13</sup>C NMR (75 MHz, CDCl<sub>3</sub>) δ 140.0, 136.9, 127.2, 120.9, 120.1, 119.1, 109.6, 102.6, 87.1, 82.5, 78.9, 49.4, 41.5, 32.4, 32.2, 31.3, 28.4, 25.3, 23.6, 23.2, 22.1, 18.5, 15.6, 13.6; IR (neat) ν (cm<sup>-1</sup>) 3538, 3046, 3032, 2932, 2858, 2226, 1463, 1373, 1345, 1311, 1276, 1224, 1202, 1172, 1147, 1110, 1082, 1045, 1015; MS (70 ev, EI) *m/z* (%) 352 (M<sup>+</sup>+1, 6.75), 351 (M<sup>+</sup>, 3.00), 188 (100); HRMS Calcd for C<sub>24</sub>H<sub>33</sub>NO (M<sup>+</sup>): 351.2562, Found: 351.2563.

**(12) 3-Ethyl-2-(1-ethyl-1*H*-indol-2-yl)-3-methylnon-4-yn-2-ol (2I) (zj-1-019, 1-021)**

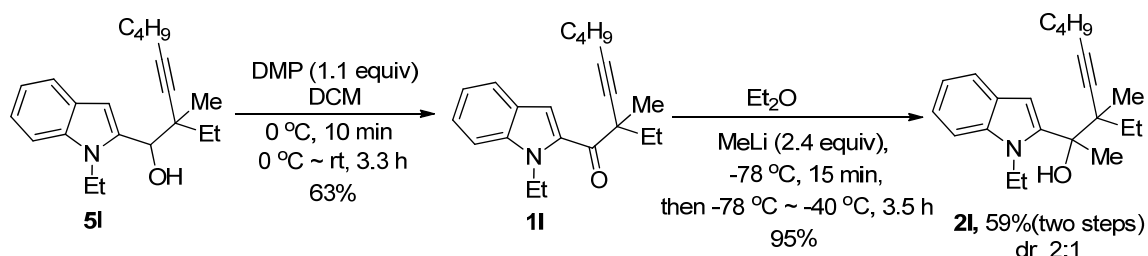

The reaction of **5I** (2.3447 g, 7.9 mmol), DMP (3.6815 g, 8.69 mmol)/DCM (25 mL), and DCM (75 mL) afforded crude **1I** (1.4618 g) (petroleum ether/ethyl acetate = 50/1~30/1) as a liquid.

The reaction of **1I** (1.3854 g, 4.5 mmol, prepared above)/diethyl ether (30 mL) and MeLi (6.8 mL, 1.6 M in Et<sub>2</sub>O, 10.9 mmol) afforded **2I** (1.3803 g, 59%, two steps) (petroleum ether/ethyl acetate = 30/1) as a liquid (dr 2:1): <sup>1</sup>H NMR (300 MHz, CDCl<sub>3</sub>)

$\delta$  7.54 (d,  $J = 7.5$  Hz, 1H, ArH), 7.32 (d,  $J = 7.8$  Hz, 1H, ArH), 7.21-7.13 (m, 1H, ArH), 7.10-7.02 (m, 1H, ArH), [6.31 (s, 0.65H), 6.30 (s, 0.33H), ArH], 5.06-4.86 (m, 1H, one proton of NCH<sub>2</sub>), 4.35-4.19 (m, 1H, one proton of NCH<sub>2</sub>), 2.54 (s, 1H, OH), 2.23 (t,  $J = 6.9$  Hz, 2H, CH<sub>2</sub>), [2.04-1.91 (m, 0.35H), 1.73-1.59 (m, 0.72H), one proton of CH<sub>2</sub>], [1.82 (s, 1.01H), 1.80 (s, 1.96H), CH<sub>3</sub>], 1.57-1.32 (m, 8H, 2  $\times$  CH<sub>2</sub> + CH<sub>3</sub> + one proton of CH<sub>2</sub>), [1.18 (s, 1.00H), 1.10 (s, 1.99H), CH<sub>3</sub>], 0.99-0.85 (m, 6H, 2  $\times$  CH<sub>3</sub>); IR (neat)  $\nu$  (cm<sup>-1</sup>) 3540, 2964, 2933, 2874, 2224, 1523, 1463, 1377, 1344, 1310, 1275, 1225, 1180, 1133, 1108, 1015; MS (70 eV, EI)  $m/z$  (%) 325 (M<sup>+</sup>, 6.69), 326 (M<sup>+</sup>+1, 3.60), 188 (100), 146(100); HRMS Calcd for C<sub>22</sub>H<sub>31</sub>NO (M<sup>+</sup>): 325.2406, Found: 325.2400.

**(13) 3,3-Dimethyl-2-(1-methyl-1H-indol-2-yl)hept-4-yn-2-ol (2m) (zj-8-008, 8-009)**

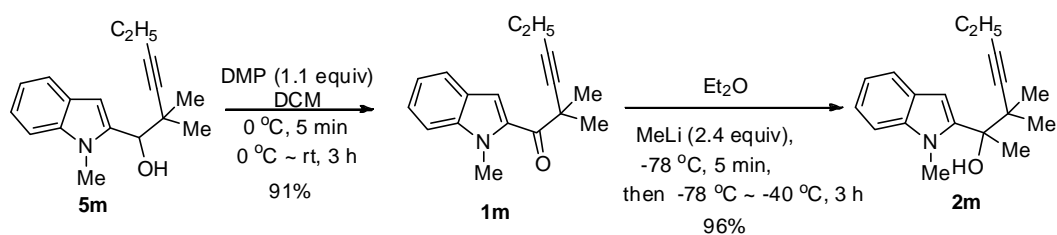

The reaction of **5m** (0.3561 g, 1.4 mmol), DMP (0.6875 g, 1.54 mmol)/DCM (5 mL), and DCM (35 mL) afforded **1m** (0.3211 g, 91%) [eluent: petroleum ether/ethyl acetate = 100/1 (500 mL) ~ 50/1 (400 mL)] as a liquid: <sup>1</sup>H NMR (300 MHz, CDCl<sub>3</sub>)  $\delta$  8.02 (s, 1H, ArH), 7.75-7.65 (m, 1H, ArH), 7.40-7.29 (m, 2H, ArH), 7.18-7.08 (m, 1H, ArH), 4.00 (s, 3H, NCH<sub>3</sub>), 2.22 (q,  $J = 7.4$  Hz, 2H, CH<sub>2</sub>), 1.59 (s, 6H, CH<sub>3</sub>  $\times$  2), 1.13 (t,  $J = 7.5$  Hz, 3H, CH<sub>3</sub>); <sup>13</sup>C NMR (75 MHz, CDCl<sub>3</sub>)  $\delta$  194.3, 139.4, 131.9, 125.64, 125.55, 123.0, 120.5, 113.1, 110.2, 85.5, 84.4, 42.3, 32.5, 28.8, 13.7, 12.6; IR (neat)  $\nu$  (cm<sup>-1</sup>) 2975, 2936, 2876, 2236, 1660, 1614, 1511, 1462, 1385, 1374, 1360, 1321,

1243, 1218, 1152, 1121, 1101; MS (70 ev, EI)  $m/z$  (%) 254 ( $M^+ + 1$ , 2.58), 253 ( $M^+$ , 12.81), 158 (100); HRMS Calcd for  $C_{17}H_{19}NO$  ( $M^+$ ): 253.1467, Found: 253.1469.

The reaction of **1m** (0.2862 g, 1.13 mmol, prepared above)/diethyl ether (25 mL) MeLi (1.7 mL, 1.6 M in  $Et_2O$ , 2.712 mmol) afforded **2m** (0.2914 g, 96%) [eluent: petroleum ether/ethyl acetate = 50/1 (500 mL)  $\sim$  30/1 (500 mL)  $\sim$  20/1 (400 mL)] as a oil:  $^1H$  NMR (300 MHz,  $CDCl_3$ )  $\delta$  7.55 (d,  $J = 7.8$  Hz, 1H, ArH), 7.30 (d,  $J = 8.1$  Hz, 1H, ArH), 7.23-7.15 (m, 1H, ArH), 7.13-7.01 (m, 1H, ArH), 6.38 (s, 1H, ArH), 4.05 (s, 3H,  $NCH_3$ ), 2.55 (s, 1H, OH), 2.22 (q,  $J = 7.5$  Hz, 2H,  $CH_2$ ), 1.80 (s, 3H,  $CH_3$ ), 1.24 (s, 3H,  $CH_3$ ), 1.19 (s, 3H,  $CH_3$ ), 1.16 (t,  $J = 7.7$  Hz, 3H,  $CH_3$ );  $^{13}C$  NMR (75 MHz,  $CDCl_3$ )  $\delta$  140.0, 138.3, 126.8, 121.1, 120.0, 119.3, 109.3, 102.7, 85.0, 84.3, 78.4, 42.9, 33.4, 28.4, 25.9, 25.6, 14.2, 12.4; IR (neat)  $\nu$  ( $cm^{-1}$ ) 3538, 2976, 2937, 2874, 2233, 1522, 1468, 1371, 1356, 1315, 1236, 1176, 1143, 1069, 1048, 1012; MS (70 ev, EI)  $m/z$  (%) 270 ( $M^+ + 1$ , 1.89), 269 ( $M^+$ , 8.50), 174 (100); HRMS Calcd for  $C_{18}H_{23}NO$  ( $M^+$ ): 269.1780, Found: 269.1776.

**(14) 2-(1-Ethyl-5-methoxy-1H-indol-2-yl)-3,3-dimethylnon-4-yn-2-ol (2n)**  
(zj-1-084, 1-107)

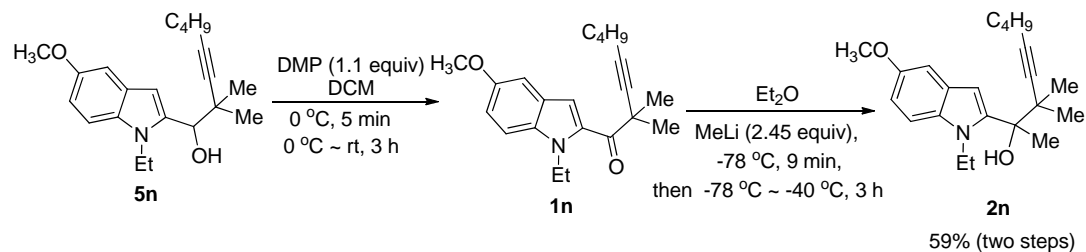

The reaction of **5n** (1.5959 g, 4.9 mmol), DMP (2.3105 g, 5.39 mmol)/DCM (20 mL), and DCM (55 mL) afforded **1n** (1.2898 g) (eluent: petroleum ether/ethyl acetate = 50/1) as a liquid.



The reaction of **1n** (1.2523 g, 3.85 mmol, prepared above)/diethyl ether (30 mL) and MeLi (5.9 mL, 1.6 M in Et<sub>2</sub>O, 9.44 mmol) afforded **2n** (0.9582 g, 59%, two steps) (eluent: petroleum ether/ethyl acetate = 50/1~30/1) as a liquid: <sup>1</sup>H NMR (300 MHz, CDCl<sub>3</sub>) δ 7.20 (d, *J* = 8.7 Hz, 1H, ArH), 7.01 (d, *J* = 2.4 Hz, 1H, ArH), 6.83 (dd, *J*<sub>1</sub> = 9.0 Hz, *J*<sub>2</sub> = 2.4 Hz, 1H, ArH), 6.26 (s, 1H, ArH), 4.97-4.83 (m, 1H, one proton of NCH<sub>2</sub>), 4.28-4.14 (m, 1H, one proton of NCH<sub>2</sub>), 3.83 (s, 3H, OCH<sub>3</sub>), 2.49 (s, 1H, OH), 2.21 (t, *J* = 7.1 Hz, 2H, CH<sub>2</sub>), 1.79 (s, 3H, CH<sub>3</sub>), 1.58-1.39 (m, 4H, 2 × CH<sub>2</sub>), 1.36 (t, *J* = 7.1 Hz, 3H, CH<sub>3</sub>), 1.24 (s, 3H, CH<sub>3</sub>), 1.17 (s, 3H, CH<sub>3</sub>), 0.93 (t, *J* = 7.1 Hz, 3H, CH<sub>3</sub>); <sup>13</sup>C NMR (75 MHz, CDCl<sub>3</sub>) δ 153.9, 140.1, 132.3, 127.4, 111.2, 110.3, 102.1, 101.9, 85.1, 83.6, 78.4, 55.9, 42.9, 41.4, 31.1, 28.6, 25.9, 25.5, 22.0, 18.4, 15.7, 13.6; IR (neat) ν (cm<sup>-1</sup>) 3539, 2955, 2933, 2872, 2831, 2226, 1620, 1581, 1522, 1476, 1455, 1400, 1371, 1319, 1299, 1271, 1228, 1210, 1181, 1151, 1110; MS (70 ev, EI) *m/z* (%) 342 (M<sup>+</sup>+1, 6.95), 341 (M<sup>+</sup>, 17.00), 218 (100), 176 (100); HRMS Calcd for C<sub>22</sub>H<sub>31</sub>NO<sub>2</sub> (M<sup>+</sup>): 341.2355, Found: 341.2356.

## 2. Synthesis of 4a~4n and 3o.

### (1) 1-Butyl-9-ethyl-2,3,4-trimethyl-9H-carbazole (4a) (zj-1-113)

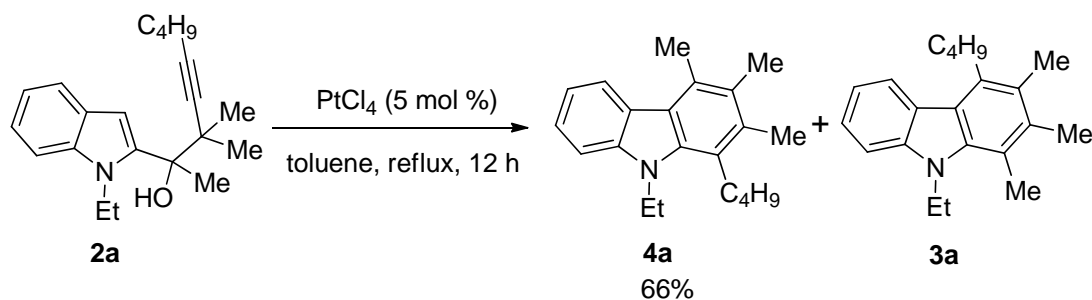

**Typical Procedure II:** To a dry Schlenk tube were added sequentially  $\text{PtCl}_4$  (17.0 mg, 0.05 mmol, weighed in glove box), **2a** (311.7 mg, 1.0 mmol), and toluene (50 mL) under  $\text{N}_2$ . After continuous stirring for 12 h under reflux, the reaction was complete as monitored by TLC. Filtration through a short column of silica gel (eluent:  $\text{Et}_2\text{O}$  (20 mL  $\times$  3)) and evaporation afforded a crude mixture of **4a** and **3a** (98 : 2, as determined by  $^1\text{H}$  NMR analysis). Column chromatography on silica gel (eluent: petroleum ether/dichloromethane = 50:1) afforded **4a** (193.6 mg, 66%) as a liquid;  $^1\text{H}$  NMR (300 MHz,  $\text{CDCl}_3$ )  $\delta$  8.20 (d,  $J = 7.8$  Hz, 1H, ArH), 7.37-7.30 (m, 1H, ArH), 7.28 (d,  $J = 7.5$  Hz, 1H, ArH), 7.18-7.10 (m, 1H, ArH), 4.37 (q,  $J = 7.1$  Hz, 2H,  $\text{NCH}_2$ ), 3.06-2.95 (m, 2H,  $\text{ArCH}_2$ ), 2.77 (s, 3H,  $\text{CH}_3$ ), 2.37 (s, 3H,  $\text{CH}_3$ ), 2.32 (s, 3H,  $\text{CH}_3$ ), 1.70-1.42 (m, 4H,  $2 \times \text{CH}_2$ ), 1.33 (t,  $J = 7.1$  Hz, 3H,  $\text{CH}_3$ ), 0.98 (t,  $J = 7.2$  Hz, 3H,  $\text{CH}_3$ );  $^{13}\text{C}$  NMR (75 MHz,  $\text{CDCl}_3$ )  $\delta$  141.4, 137.0, 133.3, 128.9, 126.2, 124.3, 124.1, 122.6, 121.1, 120.9, 118.5, 108.3, 39.5, 33.5, 28.5, 22.9, 17.2, 16.5, 16.1, 15.1, 13.9; IR (neat)  $\nu$  ( $\text{cm}^{-1}$ ) 3047, 2957, 2927, 2871, 2727, 1608, 1581, 1483, 1455, 1397, 1377, 1333, 1303, 1261, 1247, 1198, 1176, 1152, 1138, 1104, 1077, 1033, 1008; MS (70 ev, EI)  $m/z$  (%) 294 ( $\text{M}^+ + 1$ , 13.59), 293 ( $\text{M}^+$ , 55.90), 250 (100); HRMS Calcd for  $\text{C}_{21}\text{H}_{27}\text{N}$

(M<sup>+</sup>): 293.2144, Found: 293.2144.

The compounds **4b~4l** and **3m** were prepared according to **Typical Procedure II**.

**(2) 1-Butyl-2,3,4,9-tetramethyl-9H-carbazole (4b) (zj-1-141-2)**

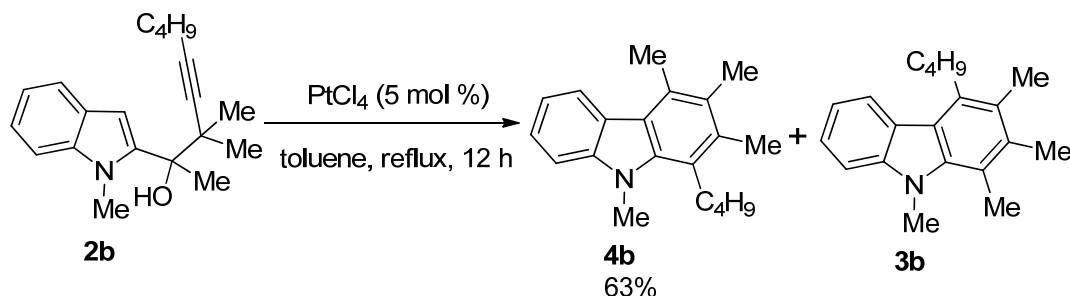

The reaction of PtCl<sub>4</sub> (17.1 mg, 0.05 mmol) and **2b** (295.4 mg, 1.0 mmol) in toluene (50 mL) under reflux for 12 h afforded **4b** (175.4 mg, 63%) (eluent: petroleum ether) (**4b** : **3b** = 96 : 4 as determined by <sup>1</sup>H NMR analysis of the crude product) as a solid: m. p. 119.6~120.7 °C (*n*-hexane/dichloromethane); <sup>1</sup>H NMR (300 MHz, CDCl<sub>3</sub>) δ 8.20 (d, *J* = 7.8 Hz, 1H, ArH), 7.43-7.33 (m, 1H, ArH), 7.29 (d, *J* = 8.4 Hz, 1H, ArH), 7.19-7.10 (m, 1H, ArH), 3.93 (s, 3H, NCH<sub>3</sub>), 3.13-2.96 (m, 2H, CH<sub>2</sub>), 2.79 (s, 3H, CH<sub>3</sub>), 2.36 (s, 3H, CH<sub>3</sub>), 2.34 (s, 3H, CH<sub>3</sub>), 1.71-1.41 (m, 4H, 2 × CH<sub>2</sub>), 0.99 (t, *J* = 7.2 Hz, 3H, CH<sub>3</sub>); <sup>13</sup>C NMR (75 MHz, CDCl<sub>3</sub>) δ 142.5, 138.4, 133.4, 128.8, 126.4, 124.3, 123.8, 122.5, 121.3, 120.9, 118.4, 108.3, 34.0, 32.9, 28.5, 23.0, 17.2, 16.4, 16.1, 13.9; IR (KBr) ν (cm<sup>-1</sup>) 2958, 2913, 2871, 2854, 1577, 1482, 1459, 1431, 1390, 1339, 1304, 1290, 1240, 1202, 1184, 1175, 1150, 1099, 1057, 1029; MS (70 ev, EI) *m/z* (%) 280 (M<sup>+</sup>+1, 12.85), 279 (M<sup>+</sup>, 52.36), 236 (100); Elemental analysis calcd (%) for C<sub>20</sub>H<sub>25</sub>N: C, 85.97; H, 9.02; N, 5.01; Found: C, 85.95; H, 9.18; N, 4.77.

**(3) 9-Benzyl-1-butyl-2,3,4-trimethyl-9H-carbazole (4c) (qya-12-176)**

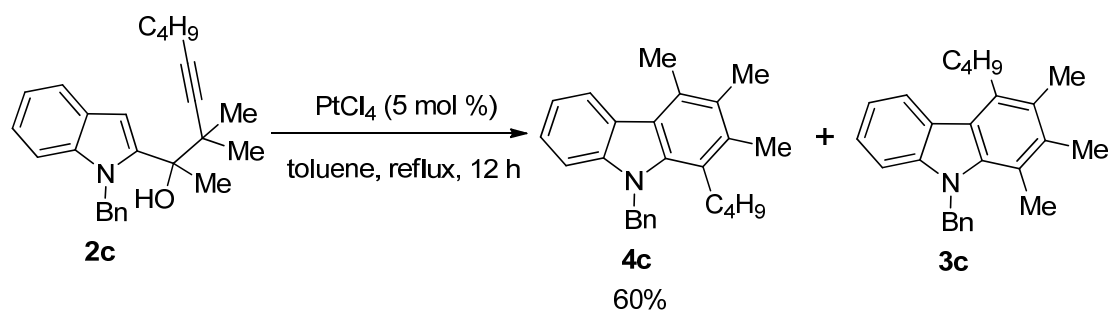

The reaction of  $\text{PtCl}_4$  (8.6 mg, 0.025 mmol) and **2c** (186.8 mg, 0.5 mmol) in toluene (25 mL) under reflux for 12 h afforded **4c** (106.4 mg, 60%) (eluent: petroleum ether/ dichloromethane = 100/1~50/1) (**4c** : **3c** = 96 : 4 as determined by  $^1\text{H}$  NMR analysis of the crude product) as a solid: m. p. 102.4~103.4 °C (*n*-hexane/ethyl acetate);  $^1\text{H}$  NMR (300 MHz,  $\text{CDCl}_3$ )  $\delta$  8.28 (d,  $J = 7.8$  Hz, 1H, ArH), 7.37-7.28 (m, 1H, ArH), 7.27-7.13 (m, 5H, ArH), 7.07-6.97 (m, 2H, ArH), 5.65 (s, 2H,  $\text{NCH}_2$ ), 2.93-2.73 (m, 2H,  $\text{CH}_2$ ), 2.87 (s, 3H,  $\text{CH}_3$ ), 2.39 (s, 3H,  $\text{CH}_3$ ), 2.36 (s, 3H,  $\text{CH}_3$ ), 1.67-1.51 (m, 2H,  $\text{CH}_2$ ), 1.43-1.28 (m, 2H,  $\text{CH}_2$ ), 0.90 (t,  $J = 7.2$  Hz, 3H,  $\text{CH}_3$ );  $^{13}\text{C}$  NMR (75 MHz,  $\text{CDCl}_3$ )  $\delta$  142.2, 138.7, 137.8, 133.7, 129.0, 128.8, 127.0, 126.8, 125.4, 124.6, 124.0, 122.6, 121.3, 121.0, 119.0, 108.6, 48.9, 34.2, 28.3, 22.9, 17.4, 16.5, 16.2, 14.0; IR (KBr)  $\nu$  ( $\text{cm}^{-1}$ ) 3027, 2955, 2926, 2870, 1605, 1582, 1495, 1461, 1396, 1376, 1355, 1330, 1295, 1235, 1171, 1160, 1117, 1068; MS (70 eV, EI)  $m/z$  (%) 356 ( $\text{M}^+ + 1$ , 6.85), 355 ( $\text{M}^+$ , 24.38), 91 (100); Elemental analysis calcd (%) for  $\text{C}_{26}\text{H}_{29}\text{N}$ : C, 87.84; H, 8.22; N, 3.94; Found: C, 87.77; H, 8.31; N, 3.70.

**(4) 9-Ethyl-2,3,4-trimethyl-1-propyl-9H-carbazole (4d) (zj-1-190)**

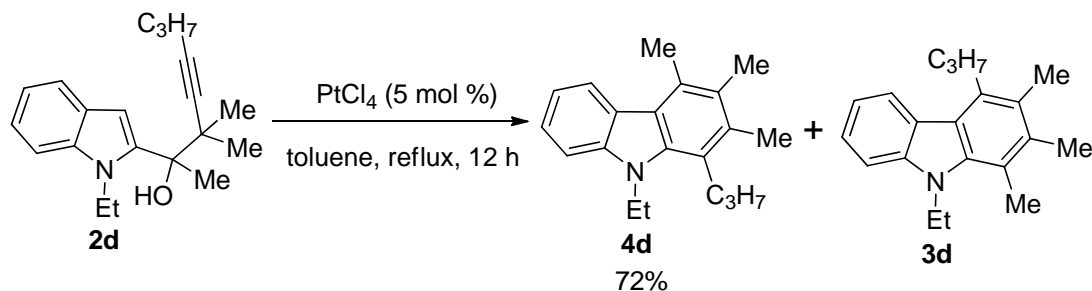

The reaction of  $\text{PtCl}_4$  (17.1 mg, 0.05 mmol) and **2d** (296.1 mg, 1.0 mmol) in toluene (50 mL) under reflux for 12 h afforded **4d** (201.5 mg, 72%) (eluent: petroleum ether/ dichloromethane = 100/1~50/1) (**4d** : **3d** = 93 : 7 as determined by  $^1\text{H}$  NMR analysis of the crude product) as a liquid;  $^1\text{H}$  NMR (300 MHz,  $\text{CDCl}_3$ )  $\delta$  8.21 (d,  $J = 7.8$  Hz, 1H, ArH), 7.39-7.31 (m, 1H, ArH), 7.29 (d,  $J = 7.8$  Hz, 1H, ArH), 7.21-7.12 (m, 1H, ArH), 4.36 (q,  $J = 7.1$  Hz, 2H,  $\text{NCH}_2$ ), 3.03-2.90 (m, 2H,  $\text{ArCH}_2$ ), 2.78 (s, 3H,  $\text{CH}_3$ ), 2.37 (s, 3H,  $\text{CH}_3$ ), 2.33 (s, 3H,  $\text{CH}_3$ ), 1.73-1.55 (m, 2H,  $\text{CH}_2$ ), 1.34 (t,  $J = 7.1$  Hz, 3H,  $\text{CH}_3$ ), 1.06 (t,  $J = 7.2$  Hz, 3H,  $\text{CH}_3$ );  $^{13}\text{C}$  NMR (75 MHz,  $\text{CDCl}_3$ )  $\delta$  141.3, 137.0, 133.3, 128.9, 126.2, 124.3, 124.1, 122.6, 121.0, 120.9, 118.5, 108.3, 39.5, 30.9, 24.5, 17.3, 16.5, 16.1, 15.1, 14.2; IR (neat)  $\nu$  ( $\text{cm}^{-1}$ ) 3046, 2958, 2928, 2869, 2728, 1607, 1579, 1455, 1397, 1377, 1332, 1302, 1259, 1240, 1222, 1177, 1152, 1138, 1104, 1077, 1033, 1008; MS (70 ev, EI)  $m/z$  (%) 280 ( $\text{M}^+ + 1$ , 19.63), 279 ( $\text{M}^+$ , 77.18), 250 (100); HRMS Calcd for  $\text{C}_{20}\text{H}_{25}\text{N}$  ( $\text{M}^+$ ): 279.1987, Found: 279.1990.

### 3.5 mmol scale (zj-2-185)

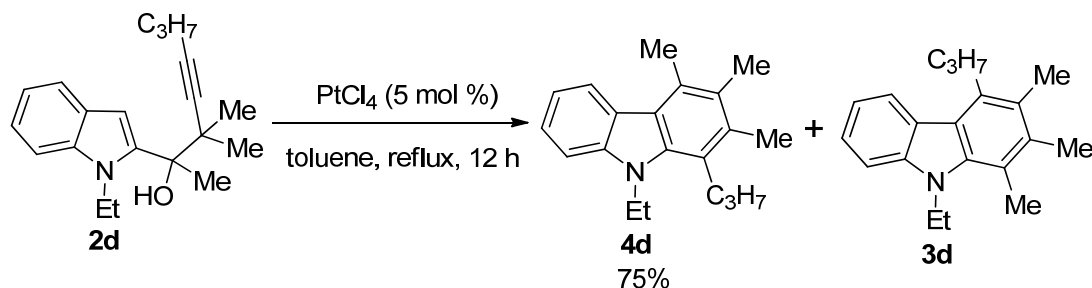

The reaction of PtCl<sub>4</sub> (59.1 mg, 0.15 mmol) and **2d** (1054.7 mg, 3.5 mmol) in toluene (175 mL) under reflux for 12 h afforded **4d** (746.2 mg, 75%) (eluent: petroleum ether/ dichloromethane = 100/1) (**4d** : **3d** = 93 : 7 as determined by <sup>1</sup>H NMR analysis of the crude product) as a liquid; <sup>1</sup>H NMR (300 MHz, CDCl<sub>3</sub>) δ 8.17 (d, *J* = 8.1 Hz, 1H, ArH), 7.35-7.26 (m, 1H, ArH), 7.18 (d, *J* = 8.1 Hz, 1H, ArH), 7.16-7.07 (m, 1H, ArH), 4.23 (q, *J* = 7.1 Hz, 2H, NCH<sub>2</sub>), 2.99-2.84 (m, 2H, ArCH<sub>2</sub>), 2.72 (s, 3H, CH<sub>3</sub>), 2.31 (s, 3H, CH<sub>3</sub>), 2.27 (s, 3H, CH<sub>3</sub>), 1.70-1.50 (m, 2H, CH<sub>2</sub>), 1.24 (t, *J* = 7.1 Hz, 3H, CH<sub>3</sub>), 1.01 (t, *J* = 7.4 Hz, 3H, CH<sub>3</sub>); <sup>13</sup>C NMR (75 MHz, CDCl<sub>3</sub>) δ 141.3, 137.0, 133.2, 128.8, 126.1, 124.3, 124.1, 122.6, 121.0, 120.8, 118.5, 108.2, 39.4, 30.8, 24.5, 17.2, 16.4, 16.0, 15.0, 14.1.

**(5) 9-Ethyl-2,3,4,6-tetramethyl-1-propyl-9H-carbazole (4e) (zj-1-037)**

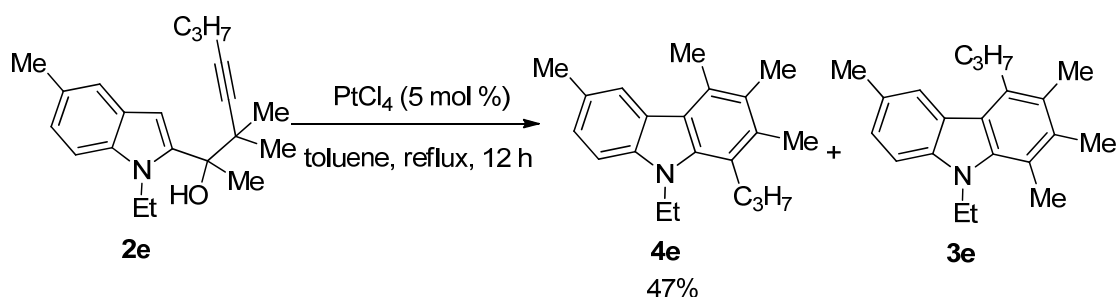

The reaction of PtCl<sub>4</sub> (16.8 mg, 0.05 mmol) and **2e** (311.4 mg, 1.0 mmol) in toluene (50 mL) under reflux for 12 h afforded **4e** (137.7 mg, 47%) (eluent: petroleum ether/ dichloromethane = 50/1 for the first round afforded 135.3 mg of pure **4e** and the impure part, which was further purified by chromatography on silica gel (eluent: petroleum ether/ dichloromethane = 50/1 ) to afford **4e** (2.4 mg, combined weight 137.7 mg) (**4e** : **3e** = 96 : 4 as determined by <sup>1</sup>H NMR analysis of the crude product) as a solid: m. p. 94.9~95.9 °C (*n*-hexane/ dichloromethane); <sup>1</sup>H

NMR (300 MHz, CDCl<sub>3</sub>)  $\delta$  8.02 (s, 1H, ArH), 7.27-7.12 (m, 2H, ArH), 4.37 (q,  $J$  = 7.0 Hz, 2H, NCH<sub>2</sub>), 3.06-2.91 (m, 2H, CH<sub>2</sub>), 2.79 (s, 3H, CH<sub>3</sub>), 2.51 (s, 3H, CH<sub>3</sub>), 2.38 (s, 3H, CH<sub>3</sub>), 2.35 (s, 3H, CH<sub>3</sub>), 1.75-1.52 (m, 2H, CH<sub>2</sub>), 1.34 (t,  $J$  = 7.1 Hz, 3H, CH<sub>3</sub>), 1.07 (t,  $J$  = 7.4 Hz, 3H, CH<sub>3</sub>); <sup>13</sup>C NMR (75 MHz, CDCl<sub>3</sub>)  $\delta$  139.7, 137.3, 133.2, 129.0, 127.5, 126.0, 125.6, 124.3, 122.8, 120.91, 120.88, 108.0, 39.6, 30.9, 24.5, 21.6, 17.4, 16.5, 16.1, 15.1, 14.2; IR (KBr)  $\nu$  (cm<sup>-1</sup>) 2959, 2927, 2869, 1583, 1488, 1470, 1447, 1376, 1335, 1308, 1261, 1240, 1178, 1149, 1102, 1077; MS (70 ev, EI)  $m/z$  (%) 293 (M<sup>+</sup>, 67.29), 264 (100); Elemental analysis calcd (%) for C<sub>21</sub>H<sub>27</sub>N: C, 85.95; H, 9.27; N, 4.77; Found: C, 86.06; H, 9.23; N, 4.60.

**(6) 9-Ethyl-2,3,4,6-tetramethyl-1-phenyl-9H-carbazole (4f) (zj-1-158)**

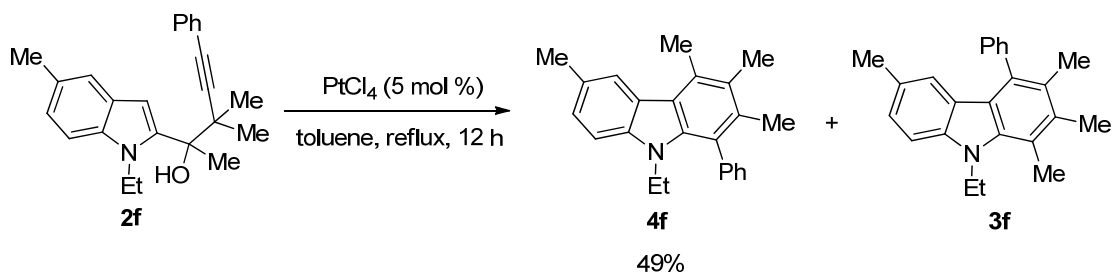

The reaction of PtCl<sub>4</sub> (17.0 mg, 0.05 mmol) and **2f** (345.9 mg, 1.0 mmol) in toluene (50 mL) under reflux for 12 h afforded **4f** (167.0 mg, 49%, purity: 97%) (eluent: petroleum ether) (**4f** : **3f** = 97 : 3 as determined by <sup>1</sup>H NMR analysis of the crude product) as a solid: m. p. 112.7~113.5 °C (*n*-hexane/ ether); <sup>1</sup>H NMR (300 MHz, CDCl<sub>3</sub>)  $\delta$  8.07 (s, 1H, ArH), 7.48-7.26 (m, 5H, ArH), 7.23-7.07 (m, 2H, ArH), 3.52 (q,  $J$  = 7.0 Hz, 2H, NCH<sub>2</sub>), 2.87 (s, 3H, CH<sub>3</sub>), 2.52 (s, 3H, CH<sub>3</sub>), 2.38 (s, 3H, CH<sub>3</sub>), 2.07 (s, 3H, CH<sub>3</sub>), 0.83 (t,  $J$  = 6.9 Hz, 3H, CH<sub>3</sub>); <sup>13</sup>C NMR (75 MHz, CDCl<sub>3</sub>)  $\delta$  140.5, 139.3, 136.4, 133.0, 130.5, 130.4, 128.2, 127.6, 127.2, 125.6, 125.3, 123.9, 122.8, 122.7, 120.5, 108.3, 38.2, 21.7, 18.2, 17.4, 15.8, 13.8; IR (KBr)  $\nu$  (cm<sup>-1</sup>) 2923,

1601, 1580, 1481, 1494, 1484, 1470, 1442, 1374, 1351, 13363, 1311, 1298, 1270, 1250, 1180, 1147, 1123, 1094, 1075, 1003; MS (70 ev, EI)  $m/z$  (%) 328 ( $M^{+1}$ , 31.11), 327 (100); Elemental analysis calcd (%) for  $C_{24}H_{25}N$ : C, 88.03; H, 7.70; N, 4.28; Found: C, 87.75; H, 7.83; N, 4.01.

**(7) 1-Butyl-9-ethyl-2,3,4,6-tetramethyl-9H-carbazole (4g) (zj-1-033)**

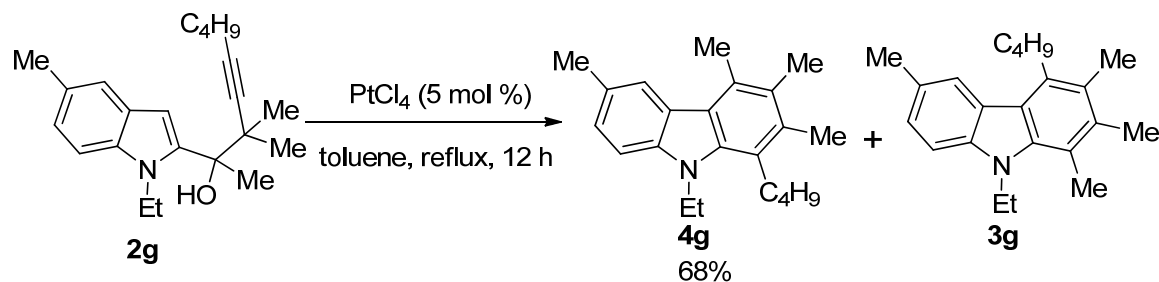

The reaction of  $PtCl_4$  (16.5 mg, 0.05 mmol) and **2g** (325.5 mg, 1.0 mmol) in toluene (50 mL) under reflux for 12 h afforded **4g** (209.1 mg, 68%) (eluent: petroleum ether/ dichloromethane = 40/1) (**4g** : **3g** = 95 : 5 as determined by  $^1H$  NMR analysis of the crude product) as a liquid;  $^1H$  NMR (300 MHz,  $CDCl_3$ )  $\delta$  8.02 (s, 1H, ArH), 7.27 (d,  $J = 8.4$  Hz, 1H, ArH), 7.22 (d,  $J = 8.4$  Hz, 1H, ArH), 4.44 (q,  $J = 7.1$  Hz, 2H,  $NCH_2$ ), 3.09-2.98 (m, 2H,  $CH_2$ ), 2.82 (s, 3H,  $CH_3$ ), 2.53 (s, 3H,  $CH_3$ ), 2.41 (s, 3H,  $CH_3$ ), 2.38 (s, 3H,  $CH_3$ ), 1.73-1.46 (m, 4H,  $2 \times CH_2$ ), 1.38 (t,  $J = 7.1$  Hz, 3H,  $CH_3$ ), 1.01 (t,  $J = 7.4$  Hz, 3H,  $CH_3$ );  $^{13}C$  NMR (75 MHz,  $CDCl_3$ )  $\delta$  139.8, 137.4, 133.2, 129.0, 127.5, 126.1, 125.6, 124.3, 122.9, 120.99, 120.96, 108.1, 39.7, 33.5, 28.6, 23.0, 21.6, 17.4, 16.5, 16.1, 15.1, 13.9; IR (neat)  $\nu$  ( $cm^{-1}$ ) 2959, 2925, 2871, 1583, 1489, 1464, 1376, 1335, 1309, 1262, 1176, 1150, 1104, 1077; MS (70 ev, EI)  $m/z$  (%) 308 ( $M^{+1}$ , 16.46), 307 ( $M^+$ , 66.58), 264 (100); HRMS Calcd for  $C_{22}H_{29}N$  ( $M^+$ ): 307.2300, Found: 307.2296.

**(8) 6-Bromo-1-butyl-9-benzyl-2,3,4-trimethyl-9H-carbazole (4h) (zj-1-062)**



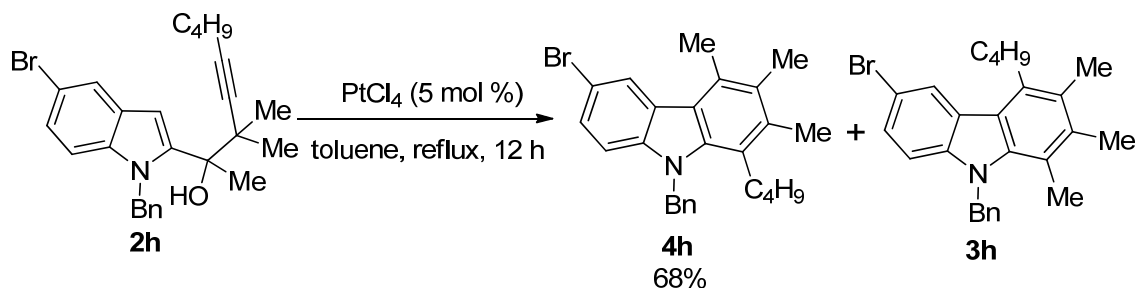

The reaction of  $\text{PtCl}_4$  (16.4 mg, 0.05 mmol) and **2h** (457.0 mg, 1.0 mmol) in toluene (50 mL) under reflux for 12 h afforded **4h** (297.8 mg, 68%) (eluent: petroleum ether, then petroleum ether / dichloromethane = 100/1) (**4h** : **3h** = 92 : 8 as determined by  $^1\text{H}$  NMR analysis of the crude product) as a solid: m. p. 122.4~123.9 °C (*n*-hexane/ dichloromethane);  $^1\text{H}$  NMR (300 MHz,  $\text{CDCl}_3$ )  $\delta$  8.31 (d,  $J = 2.1$  Hz, 1H, ArH), 7.29 (dd,  $J_1 = 8.7$  and  $J_2 = 1.8$  Hz, 1H, ArH), 7.22-7.07 (m, 3H, ArH), 6.97-6.87 (m, 3H, ArH), 5.47 (s, 2H,  $\text{NCH}_2$ ), 2.82-2.65 (m, 2H,  $\text{CH}_2$ ), 2.70 (s, 3H,  $\text{CH}_3$ ), 2.30 (s, 3H,  $\text{CH}_3$ ), 2.29 (s, 3H,  $\text{CH}_3$ ), 1.62-1.43 (m, 2H,  $\text{CH}_2$ ), 1.40-1.19 (m, 2H,  $\text{CH}_2$ ), 0.87 (t,  $J = 7.4$  Hz, 3H,  $\text{CH}_3$ );  $^{13}\text{C}$  NMR (75 MHz,  $\text{CDCl}_3$ )  $\delta$  140.7, 138.1, 138.0, 134.6, 129.0, 128.8, 127.2, 127.1, 125.5, 125.2, 124.9, 121.3, 120.0, 111.8, 109.9, 48.8, 34.0, 28.2, 22.8, 17.2, 16.5, 16.1, 13.9; IR (KBr)  $\nu$  ( $\text{cm}^{-1}$ ) 3063, 3024, 2956, 2926, 2871, 2725, 1604, 1582, 1495, 1485, 1454, 1391, 1355, 1296, 1236, 1194, 1156, 1127, 1103, 1074, 1029, 1002; MS (70 ev, EI)  $m/z$  (%) 435 ( $\text{M}(\text{Br}^{81})^+$ , 99.54), 433 ( $\text{M}(\text{Br}^{79})^+$ , 100); Elemental analysis calcd (%) for  $\text{C}_{26}\text{H}_{28}\text{BrN}$ : C, 71.89; H, 6.50; N, 3.22; Found: C, 71.55; H, 6.49; N, 3.13.

**(9) 1-Butyl-9-ethyl-2,3,4,7-tetramethyl-9H-carbazole (4i) (zj-1-126)**

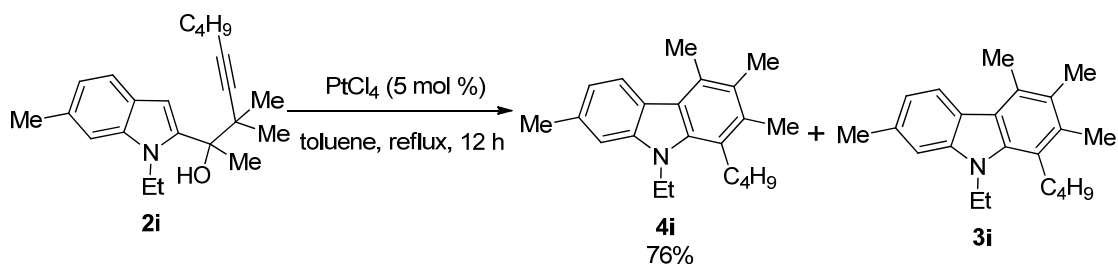

The reaction of  $\text{PtCl}_4$  (16.7 mg, 0.05 mmol) and **2i** (324.9 mg, 1.0 mmol) in toluene (50 mL) under reflux for 12 h afforded **4i** (231.9 mg, 76%) (eluent: petroleum ether/ dichloromethane = 50/1) (**4i** : **3i** = 95 : 5 as determined by  $^1\text{H}$  NMR analysis of the crude product) as a oil;  $^1\text{H}$  NMR (300 MHz,  $\text{CDCl}_3$ )  $\delta$  8.07 (d,  $J = 7.8$  Hz, 1H, ArH), 7.14 (s, 1H, ArH), 6.98 (dd,  $J_1 = 8.1$  and  $J_2 = 0.9$  Hz, 1H, ArH), 4.40 (q,  $J = 7.1$  Hz, 2H,  $\text{NCH}_2$ ), 3.07-2.94 (m, 2H,  $\text{CH}_2$ ), 2.77 (s, 3H,  $\text{CH}_3$ ), 2.52 (s, 3H,  $\text{CH}_3$ ), 2.38 (s, 3H,  $\text{CH}_3$ ), 2.34 (s, 3H,  $\text{CH}_3$ ), 1.72-1.43 (m, 4H,  $2 \times \text{CH}_2$ ), 1.38 (t,  $J = 7.1$  Hz, 3H,  $\text{CH}_3$ ), 1.00 (t,  $J = 7.2$  Hz, 3H,  $\text{CH}_3$ );  $^{13}\text{C}$  NMR (75 MHz,  $\text{CDCl}_3$ )  $\delta$  141.9, 137.1, 134.2, 132.7, 128.6, 126.1, 122.4, 121.9, 121.2, 120.9, 120.0, 108.6, 39.5, 33.5, 28.5, 23.0, 22.1, 17.2, 16.4, 16.1, 15.2, 13.9; IR (neat)  $\nu$  ( $\text{cm}^{-1}$ ) 2956, 2924, 2871, 1617, 1583, 1489, 1455, 1397, 1377, 1332, 1302, 1287, 1264, 1247, 1193, 1170, 1103, 1077, 1013; MS (70 eV, EI)  $m/z$  (%) 308 ( $\text{M}^+ + 1$ , 16.31), 307 ( $\text{M}^+$ , 60.42), 264 (100); HRMS Calcd for  $\text{C}_{22}\text{H}_{29}\text{N}$  ( $\text{M}^+$ ): 307.2300, Found: 307.2307.

**(10) 1-Butyl-9-ethyl-2,3,4,8-tetramethyl-9H-carbazole (4j) (zj-1-078)**

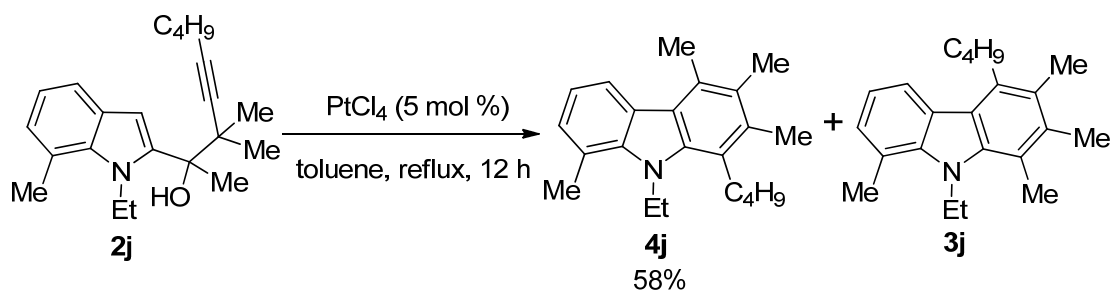

The reaction of  $\text{PtCl}_4$  (17.1 mg, 0.05 mmol) and **2j** (327.7 mg, 1.0 mmol) in

toluene (50 mL) under reflux for 12 h afforded **4j** (178.3 mg, 58%) (eluent: petroleum ether ~ petroleum ether/ dichloromethane = 100/1) (**4j** : **3j** = 94: 6 as determined by <sup>1</sup>H NMR analysis of the crude product) as a oil; <sup>1</sup>H NMR (300 MHz, CDCl<sub>3</sub>) δ 8.11-7.98 (m, 1H, ArH), 7.12-7.02 (m, 2H, ArH), 4.52 (q, *J* = 7.1 Hz, 2H, NCH<sub>2</sub>), 3.07-2.92 (m, 2H, CH<sub>2</sub>), 2.74 (s, 3H, CH<sub>3</sub>), 2.68 (s, 3H, CH<sub>3</sub>), 2.36 (s, 3H, CH<sub>3</sub>), 2.32 (s, 3H, CH<sub>3</sub>), 1.74-1.60 (m, 2H, CH<sub>2</sub>), 1.58-1.42 (m, 2H, CH<sub>2</sub>), 1.00 (t, *J* = 7.4 Hz, 3H, CH<sub>3</sub>), 0.88 (t, *J* = 7.1 Hz, 3H, CH<sub>3</sub>); <sup>13</sup>C NMR (75 MHz, CDCl<sub>3</sub>) δ 142.4, 140.2, 133.5, 128.5, 128.1, 127.6, 127.4, 123.3, 122.6, 121.2, 120.6, 119.7, 41.5, 32.2, 29.3, 23.2, 21.1, 17.3, 16.7, 16.2, 14.02, 13.96; IR (neat) ν (cm<sup>-1</sup>) 3093, 3042, 2957, 2870, 2731, 1575, 1455, 1407, 1377, 1327, 1297, 1254, 1236, 1206, 1162, 1117, 1091, 1077, 1050; MS (70 ev, EI) *m/z* (%) 308 (M<sup>+</sup>+1, 21.86), 307 (M<sup>+</sup>, 88.14), 264 (100); HRMS Calcd for C<sub>22</sub>H<sub>29</sub>N (M<sup>+</sup>): 307.2300, Found: 307.2304.

**(11) 1-Butyl-9-ethyl-4-methyl-2,3-pentamethylene-9H-carbazole (4k) (zj-2-007)**

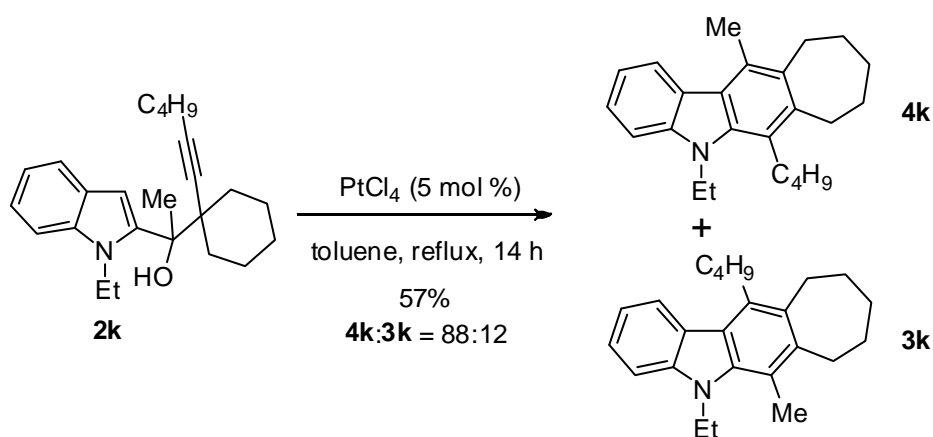

The reaction of PtCl<sub>4</sub> (17.0 mg, 0.05 mmol) and **2k** (352.7 mg, 1.0 mmol) in toluene (50 mL) under reflux for 12 h afforded **4k** and **3k** (190.2 mg, 57%, **4k** : **3k** = 88:12 as determined by <sup>1</sup>H NMR analysis of the crude product) (eluent: petroleum ether/ dichloromethane = 50/1~30/1 for the first round, petroleum ether/

dichloromethane = 50/1~30/1 for the second round (impure part)) as a liquid;  $^1\text{H}$  NMR (300 MHz,  $\text{CDCl}_3$ )  $\delta$  8.32-8.15 (m, 1H, ArH), 7.45-7.26 (m, 2H, ArH), 7.23-7.07 (m, 1H, ArH), 4.53-4.29 (m, 2H,  $\text{NCH}_2$ ), 3.11-2.88 (m, 6H,  $3 \times \text{CH}_2$ ), 2.82 (s, 3H,  $\text{CH}_3$ ), 1.88-1.45 (m, 10H,  $5 \times \text{CH}_2$ ), 1.41 (t,  $J = 7.1$  Hz, 3H,  $\text{CH}_3$ ), 1.01 (t,  $J = 7.1$  Hz, 3H,  $\text{CH}_3$ );  $^{13}\text{C}$  NMR (75 MHz,  $\text{CDCl}_3$ )  $\delta$  141.4, 1406, 137.2, 133.2, 127.8, 124.2, 122.7, 120.9, 119.8, 118.5, 108.3, 39.8, 34.5, 31.0, 29.0, 28.7, 28.3, 28.1, 27.6, 23.0, 17.1, 15.3, 14.0; the following signals are discernible for **3k**: 3.56-3.44 (m, 2H,  $\text{CH}_2$ ), 2.42 (s, 3H,  $\text{CH}_3$ ), 1.31 (t,  $J = 7.1$  Hz, 3H,  $\text{CH}_3$ ); IR (neat)  $\nu$  ( $\text{cm}^{-1}$ ) 3045, 2957, 2929, 2852, 1607, 1577, 1483, 1452, 1397, 1377, 1350, 1333, 1350, 1293, 1261, 1201, 1173, 1137, 1104, 1075, 1033, 1007; GC-MS (GC condition: injector:  $280^\circ\text{C}$ ; column: DB5 column  $30 \text{ m} \times 0.25 \text{ mm}$ , temperature programming:  $60^\circ\text{C}$  (2 min),  $20^\circ\text{C}/\text{min}$  to  $280^\circ\text{C}$ ,  $280^\circ\text{C}$  (30 min); detector:  $280^\circ\text{C}$ ) (70 ev, EI)  $m/z$  (%) for **3k**:  $T_R$  4.9 min: 334 ( $M^+ + 1$ , 20.68), 333 ( $M^+$ , 79.60), 290 (100); for **4k**:  $T_R$  5.0 min: 334 ( $M^+ + 1$ , 26.13), 333 ( $M^+$ , 95.56), 290 (100); HRMS Calcd for  $\text{C}_{24}\text{H}_{31}\text{N}$  ( $M^+$ ): 333.2457, Found: 333.2454.

**(12) 1-Butyl-2,9-diethyl-3,4-dimethyl-9H-carbazole (4l) (zj-5-176-2)**

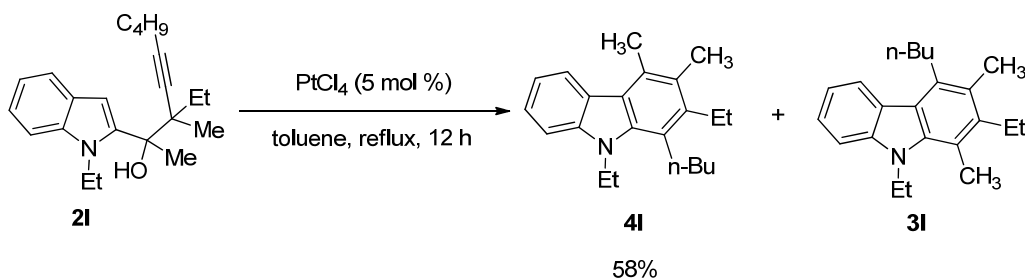

The reaction of  $\text{PtCl}_4$  (16.9 mg, 0.05 mmol) and **2l** (324.8 mg, 1.0 mmol) in toluene (50 mL) under reflux for 12 h afforded a mixture of **4l** and **3l** (**4l** : **3l** = 98 : 2 as determined by  $^1\text{H}$  NMR analysis of the crude product) with an impurity. Purification by column chromatography afforded **4l** (195.1 mg, 58%, purity: 92%)

[eluent: petroleum ether (500 mL) ~ petroleum ether/dichloromethane = 100/1 (500 mL × 4) ~ 30/1 (310 mL)].

After repeated recrystallization from the *n*-hexane/ dichloromethane, pure **4l** was afforded as a solid: m. p. 98.1~99.2 °C; <sup>1</sup>H NMR (300 MHz, CDCl<sub>3</sub>) δ 8.23 (d, *J* = 7.8 Hz, 1H, ArH), 7.45-7.34 (m, 2H, ArH), 7.23-7.11 (m, 1H, ArH), 4.48 (q, *J* = 7.2 Hz, 2H, NCH<sub>2</sub>), 3.12-2.95 (m, 2H, CH<sub>2</sub>), 2.88 (q, *J* = 7.5 Hz, 2H, CH<sub>2</sub>), 2.82 (s, 3H, CH<sub>3</sub>), 2.43 (s, 3H, CH<sub>3</sub>), 1.75-1.47 (m, 4H, 2 × CH<sub>2</sub>), 1.38 (t, *J* = 7.1 Hz, 3H, CH<sub>3</sub>), 1.23 (t, *J* = 7.5 Hz, 3H, CH<sub>3</sub>), 1.02 (t, *J* = 7.2 Hz, 3H, CH<sub>3</sub>); <sup>13</sup>C NMR (75 MHz, CDCl<sub>3</sub>) δ 141.4, 139.2, 137.1, 129.7, 125.6, 124.4, 124.2, 122.7, 121.3, 120.6, 118.5, 108.3, 39.4, 34.5, 28.0, 23.1, 17.3, 15.5, 15.1, 15.0, 13.9; IR (neat) ν (cm<sup>-1</sup>) 3048, 2959, 2927, 2870, 1608, 1580, 1447, 1397, 1377, 1352, 1332, 1307, 1263, 1248, 1231, 1194, 1175, 1152, 1136, 1104, 1073, 1052, 1034, 1016; MS (70 ev, EI) *m/z* (%) 308 (M<sup>+</sup>+1, 19.79), 307 (M<sup>+</sup>, 75.30), 264 (100); Elemental analysis calcd (%) for C<sub>22</sub>H<sub>29</sub>N: C, 85.94; H, 9.51; N, 4.56; Found: C, 85.99 ; H, 9.35 ; N, 4.33.

**(13) 1-Ethyl-2,3,4,9-tetramethyl-9H-carbazole (4m) (zj-8-010-2)**

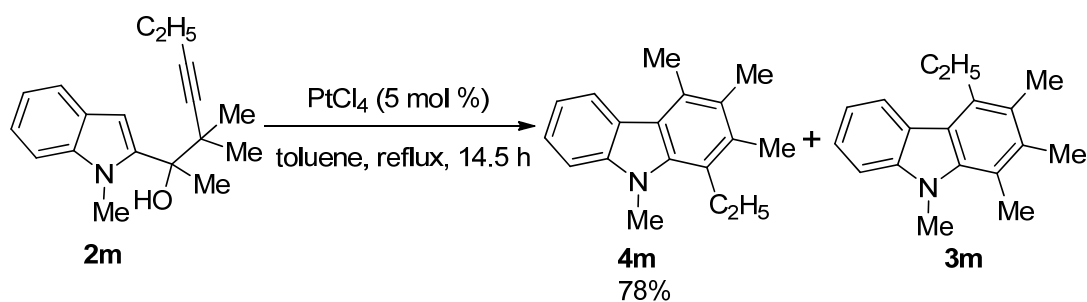

The reaction of PtCl<sub>4</sub> (16.9 mg, 0.05 mmol) and **2m** (268.7 mg, 1.0 mmol) in toluene (50 mL) under reflux for 14.5 h afforded **4m** (196.1 mg, 78%) [eluent: petroleum ether (500 mL × 5) (**4m** : **3m** = 97 : 3 as determined by <sup>1</sup>H NMR analysis

of the crude product) as a solid: m. p. 94.6 ~ 95.7 °C (*n*-hexane/ diethyl ether); <sup>1</sup>H NMR (300 MHz, CDCl<sub>3</sub>) δ 8.22 (d, *J* = 7.8 Hz, 1H, ArH), 7.44-7.31 (m, 2H, ArH), 7.22-7.12 (m, 1H, ArH), 4.00 (s, 3H, NCH<sub>3</sub>), 3.15 (q, *J* = 7.5 Hz, 2H, CH<sub>2</sub>), 2.81 (s, 3H, CH<sub>3</sub>), 2.40 (s, 3H, CH<sub>3</sub>), 2.37 (s, 3H, CH<sub>3</sub>), 1.32 (t, *J* = 7.5 Hz, 3H, CH<sub>3</sub>); <sup>13</sup>C NMR (75 MHz, CDCl<sub>3</sub>) δ 142.4, 138.2, 133.3, 128.9, 126.4, 124.3, 123.8, 122.51, 122.47, 120.9, 118.4, 108.3, 32.9, 21.6, 17.2, 16.2, 16.10, 16.06; IR (KBr) ν (cm<sup>-1</sup>) 2957, 2927, 2867, 1607, 1582, 1462, 1393, 1328, 1304, 1284, 1241, 1188, 1152, 1105, 1092, 1050, 1030; MS (70 ev, EI) *m/z* (%) 252 (M<sup>+</sup>+1, 19.31), 251 (M<sup>+</sup>, 82.06), 236 (100); Elemental analysis calcd (%) for C<sub>18</sub>H<sub>21</sub>N: C, 86.01; H, 8.42; N, 5.57; Found: C, 86.11; H, 8.30; N, 5.37.

**(14) 1-Butyl-9-ethyl-6-methoxy-2,3,4-trimethyl-9H-carbazole (4n) (zj-1-123-2)**

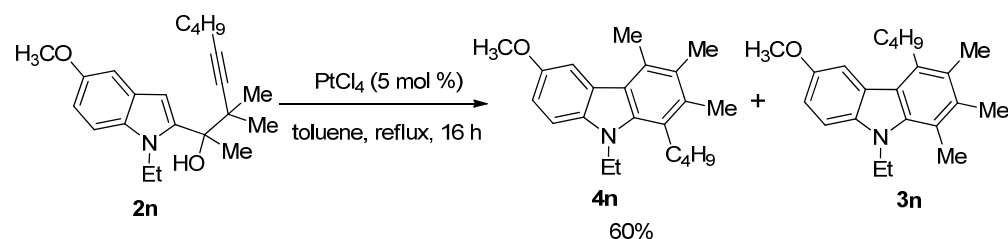

The reaction of PtCl<sub>4</sub> (17.0 mg, 0.05 mmol) and **2n** (341.2 mg, 1.0 mmol) in toluene (50 mL) under reflux for 16 h afforded **4n** (194.0 mg, 60%) (eluent: petroleum ether/ dichloromethane = 50/1~30/1~10:1) (**4n** : **3n** = 98 : 2 as determined by <sup>1</sup>H NMR analysis of the crude product) as a liquid: <sup>1</sup>H NMR (300 MHz, CDCl<sub>3</sub>) δ 7.77 (d, *J* = 2.1 Hz, 1H, ArH), 7.28 (d, *J* = 8.7 Hz, 1H, ArH), 7.06 (dd, *J*<sub>1</sub> = 8.7 Hz, *J*<sub>2</sub> = 2.4 Hz, 1H, ArH), 4.43 (q, *J* = 7.1 Hz, 2H, NCH<sub>2</sub>), 3.91 (s, 3H, CH<sub>3</sub>), 3.11-2.92 (m, 2H, CH<sub>2</sub>), 2.81 (s, 3H, CH<sub>3</sub>), 2.41 (s, 3H, CH<sub>3</sub>), 2.37 (s, 3H, CH<sub>3</sub>), 1.71-1.45 (m, 4H, 2 × CH<sub>2</sub>), 1.38 (t, *J* = 7.1 Hz, 3H, CH<sub>3</sub>), 1.01 (t, *J* = 7.2 Hz, 3H, CH<sub>3</sub>); <sup>13</sup>C NMR (75

MHz, CDCl<sub>3</sub>)  $\delta$  153.0, 137.7, 136.6, 133.5, 128.9, 125.9, 124.5, 121.1, 120.9, 112.3, 108.7, 107.1, 56.2, 39.7, 33.4, 28.5, 23.0, 17.2, 16.5, 16.1, 15.1, 13.9; IR (neat)  $\nu$  (cm<sup>-1</sup>) 2953, 2928, 2869, 2827, 1617, 1581, 1487, 1377, 1353, 1311, 1296, 1259, 1219, 1175, 1143, 1105, 1077, 1041; GC-MS (GC condition: injector: 280 °C; column: DB5 column 30 m  $\times$  0.25 mm, temperature programming: 60 °C (2 min), 20 °C/min to 280 °C, 280 °C (30 min); detector: 280 °C) (70 ev, EI)  $m/z$  (%) for **4n**: T<sub>R</sub> 6.4 min: 324 (M<sup>+</sup>+1, 24.29), 323 (M<sup>+</sup>, 94.81), 280 (100); HRMS Calcd for C<sub>22</sub>H<sub>29</sub>NO (M<sup>+</sup>): 323.2249, Found: 323.2254.

**(15) 4-Butyl-9-ethyl-2,3-dimethyl-9H-carbazole (3o) (zj-2-117)**

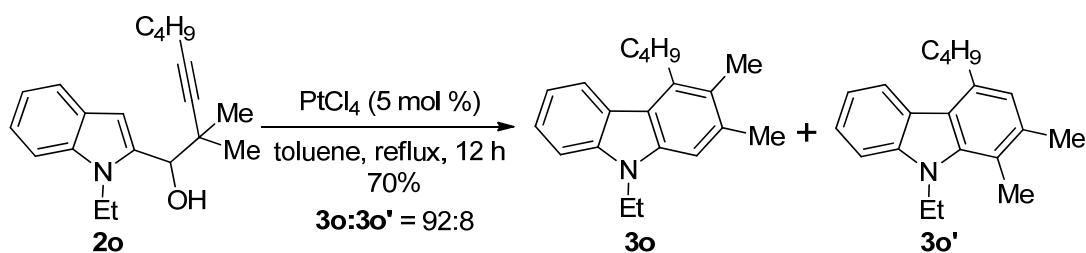

The reaction of PtCl<sub>4</sub> (3.5 mg, 0.01 mmol) and **2o** (58.4 mg, 0.2 mmol) in toluene (10 mL) under reflux for 12 h afforded **3o** and **3o'** (38.5 mg, 70%, **3o** : **3o'** = 92 : 8 as determined by <sup>1</sup>H NMR analysis of the crude product) (petroleum ether/dichloromethane = 50/1~30/1) (**3o** : **3o'** = 91 : 9 determined by <sup>1</sup>H NMR of crude product) as a liquid: <sup>1</sup>H NMR of **3o**<sup>2b</sup> (300 MHz, CDCl<sub>3</sub>)  $\delta$  8.12 (d,  $J$  = 8.1 Hz, 1H, ArH), 7.46-7.33 (m, 2H, ArH), 7.25-7.15 (m, 1H, ArH), 7.09 (s, 1H, ArH), 4.31 (q,  $J$  = 7.2 Hz, 2H, NCH<sub>2</sub>), 3.33-3.19 (m, 2H, ArCH<sub>2</sub>), 2.49 (s, 3H, ArCH<sub>3</sub>), 2.37 (s, 3H, ArCH<sub>3</sub>), 1.85-1.52 (m, 4H, 2  $\times$  CH<sub>2</sub>), 1.39 (t,  $J$  = 7.4 Hz, 3H, CH<sub>3</sub>), 1.03 (t,  $J$  = 7.1 Hz, 3H, CH<sub>3</sub>); the following signals are discernible for **3o'**: 8.07 (d,  $J$  = 8.1 Hz, 1H, ArH), 6.86 (s, 1H, ArH), 4.58 (q,  $J$  = 7.1 Hz, 2H, NCH<sub>2</sub>), 3.17-3.10 (m, 2H, ArCH<sub>2</sub>), 2.68 (s,

3H, ArCH<sub>3</sub>), 2.46 (s, 3H, ArCH<sub>3</sub>); <sup>13</sup>C NMR of **3o** (75 MHz, CDCl<sub>3</sub>) δ 140.0, 138.6, 136.4, 135.0, 124.9, 124.2, 123.1, 122.2, 119.3, 118.4, 108.0, 107.2, 37.1, 31.4, 30.4, 23.4, 22.3, 14.5, 14.1, 13.6; the following signals are discernible for **3o'**: 135.3, 134.5, 124.4, 123.0, 118.8, 115.8, 108.5, 39.9, 33.9, 32.0, 29.7, 23.0, 20.915.5, 14.8; IR (neat) ν (cm<sup>-1</sup>) 3048, 2955, 2929, 2872, 2852, 1619, 1598, 1569, 1469, 1456, 1377, 1349, 1330, 1314, 1264, 1239, 1207, 1180, 1153, 1132, 1110, 1082, 1029, 1004; GC-MS (GC condition: injector: 280 °C; column: DB5 column 30 m × 0.25 mm, temperature programming: 60 °C (2 min), 20 °C/min to 280 °C, 280 °C (30 min); detector: 280 °C) (70 eV, EI) *m/z* (%) for **3o**: T<sub>R</sub> 3.8 min: 280 (M<sup>+</sup>+1, 21.34), 279 (M<sup>+</sup>, 100), for **3o'**: T<sub>R</sub> 3.9 min: 280 (M<sup>+</sup>+1, 22.20), 279 (M<sup>+</sup>, 100).



### 3. Computational details

All calculations were performed with the Gaussian 09 program.<sup>3</sup> Geometries have been fully optimized with the density functional theory of B3LYP method.<sup>4,5</sup> The 6-31G(d) basis set was used for C, H, O, N, and Cl atoms and LANL2DZ basis set<sup>6</sup> with effective core potential (ECP) for Pt atom. Harmonic vibration frequency calculations were carried out for all the stationary points to confirm each structure being either a minimum (no imaginary frequency) or a transition structure (one imaginary frequency). Solvent effect has been considered by using the CPCM<sup>7</sup>(UAHF atomic radii) model based on the gas-phase-optimized structures. The reported relative energies are free energies ( $\Delta G_{\text{sol}}$ ) in toluene (dielectric constant  $\epsilon = 2.37$ ).

**Table S1.** Electronic energies ( $E_{\text{elec}}$ ), Gibbs free energies ( $G_{298}$ ), enthalpies ( $H_{298}$ ) and free energies ( $\text{delt } G_{\text{sol}}$ ) in toluene ( $\epsilon = 2.37$ ) for all stationary points.

| species     | $E_{\text{elec}}$ | $H_{298}$    | $G_{298}$    | $\text{delt } G_{\text{sol}}$ | $G_{\text{sol}}$ |
|-------------|-------------------|--------------|--------------|-------------------------------|------------------|
| <b>M1_1</b> | -2789.672282      | -2789.263502 | -2789.350036 | -18.42                        | -2789.37939      |
| <b>TS1</b>  | -2789.663559      | -2789.255900 | -2789.341829 | -16.50                        | -2789.368123     |
| <b>M2_1</b> | -2789.69833       | -2789.287797 | -2789.374180 | -19.94                        | -2789.405956     |
| <b>TS2</b>  | -2789.646753      | -2789.238215 | -2789.324259 | -15.81                        | -2789.349454     |
| <b>M2_2</b> | -2789.672632      | -2789.262542 | -2789.348296 | -24.46                        | -2789.387275     |

**S2.** Calculated Cartesian coordinates of all stationary points **M1\_1**.

|   |             |             |             |
|---|-------------|-------------|-------------|
| C | 1.40650900  | 1.90811300  | 0.10155800  |
| C | -0.04318000 | 1.80243400  | -0.53366600 |
| C | 2.95852000  | 0.41431800  | -1.22345300 |
| C | 4.20136100  | 0.03342600  | -0.79962600 |
| C | 1.99654500  | 0.43842700  | -0.08346100 |
| C | 4.09672400  | -0.24988300 | 0.62094800  |
| C | 5.45274900  | -0.13020000 | -1.47617000 |
| C | 5.22898500  | -0.71126700 | 1.34407400  |
| C | 6.52827200  | -0.56793500 | -0.75685800 |
| H | 5.52665900  | 0.09214900  | -2.53603000 |

|            |             |             |             |
|------------|-------------|-------------|-------------|
| C          | 6.40385200  | -0.85704000 | 0.64568700  |
| H          | 5.17224500  | -0.92961300 | 2.40428200  |
| H          | 7.49322800  | -0.70401600 | -1.23371500 |
| H          | 7.28655400  | -1.20437800 | 1.17585900  |
| N          | 2.85323100  | -0.03294600 | 1.04738100  |
| C          | 2.34498400  | -0.45502400 | 2.35345300  |
| H          | 1.26172000  | -0.57847500 | 2.29269100  |
| H          | 2.78663500  | -1.41892600 | 2.62040000  |
| H          | 2.58399600  | 0.28163600  | 3.12589400  |
| C          | -0.35992900 | 0.33191700  | -0.21300100 |
| C          | 0.73811500  | -0.45317800 | -0.20325100 |
| H          | 2.68202200  | 0.72676800  | -2.21972800 |
| O          | 2.27762600  | 2.78810200  | -0.60832900 |
| H          | 1.93501000  | 3.69076000  | -0.49966200 |
| C          | -0.95192000 | 2.92450900  | -0.00927800 |
| H          | -1.92070600 | 2.88409700  | -0.50807000 |
| H          | -1.13604600 | 2.87240600  | 1.06132700  |
| H          | -0.49438500 | 3.89538200  | -0.24934800 |
| C          | -0.00015500 | 1.94636400  | -2.07824600 |
| H          | 0.35354800  | 2.94276600  | -2.36225400 |
| H          | 0.63780900  | 1.19925700  | -2.55733500 |
| H          | -1.01037000 | 1.80888100  | -2.47026800 |
| Cl         | -1.56671700 | -1.88197600 | 1.81109200  |
| C          | 0.94577500  | -1.94281700 | -0.31828600 |
| H          | 1.69411300  | -2.27505200 | 0.41401900  |
| H          | 0.01756900  | -2.45046000 | -0.06546900 |
| Pt         | -2.23785400 | -0.35958400 | 0.08496500  |
| Cl         | -2.88696100 | 1.09351900  | 1.86148000  |
| C          | 1.36810000  | 2.34890000  | 1.56902200  |
| H          | 2.37497500  | 2.32957500  | 1.99447600  |
| H          | 1.00945800  | 3.38100100  | 1.62096900  |
| H          | 0.69061600  | 1.74345000  | 2.17589100  |
| Cl         | -2.10850700 | -2.03020100 | -1.60296200 |
| Cl         | -3.39478000 | 0.98835800  | -1.50039800 |
| C          | 1.38589100  | -2.38920000 | -1.72563400 |
| H          | 0.62403600  | -2.12396400 | -2.46285600 |
| H          | 2.34322500  | -1.94796800 | -2.03050300 |
| H          | 1.50830500  | -3.47804000 | -1.74234700 |
| <b>TS1</b> |             |             |             |
| C          | 1.50623500  | 1.84743000  | 0.16141500  |
| C          | 0.08963100  | 1.72725300  | -0.42096900 |
| C          | 2.96957100  | 0.16968700  | -1.28883700 |
| C          | 4.27523900  | 0.02853000  | -0.80946900 |
| C          | 2.05241500  | -0.11181100 | -0.23508000 |

|    |             |             |             |
|----|-------------|-------------|-------------|
| C  | 4.16537400  | -0.47264900 | 0.53285000  |
| C  | 5.55803300  | 0.24899000  | -1.37649600 |
| C  | 5.31159800  | -0.75825200 | 1.30232200  |
| C  | 6.67041300  | -0.03840500 | -0.61775000 |
| H  | 5.64953300  | 0.62670300  | -2.39056800 |
| C  | 6.54155200  | -0.53880900 | 0.70955300  |
| H  | 5.23521100  | -1.14248100 | 2.31396600  |
| H  | 7.66380400  | 0.11319000  | -1.02805800 |
| H  | 7.44406300  | -0.75596300 | 1.27392100  |
| N  | 2.85075300  | -0.59079200 | 0.85292300  |
| C  | 2.35327100  | -1.18425800 | 2.09078800  |
| H  | 1.26247000  | -1.20609000 | 2.07190500  |
| H  | 2.72030900  | -2.21116900 | 2.18536400  |
| H  | 2.68711900  | -0.60547800 | 2.95856300  |
| C  | -0.32811000 | 0.25474200  | -0.20530100 |
| C  | 0.65574600  | -0.66065800 | -0.33490400 |
| H  | 2.67630300  | 0.53236600  | -2.26324100 |
| O  | 2.25913300  | 2.75580100  | -0.49337900 |
| H  | 3.03113600  | 3.00449700  | 0.04437900  |
| C  | -0.71296900 | 2.86222000  | 0.27165100  |
| H  | -1.71251100 | 2.90689900  | -0.16129800 |
| H  | -0.82539600 | 2.71064000  | 1.34298100  |
| H  | -0.20550400 | 3.81450700  | 0.07925500  |
| C  | 0.06525800  | 2.01175600  | -1.94369300 |
| H  | 0.39528300  | 3.03356200  | -2.15154000 |
| H  | 0.69200000  | 1.31416500  | -2.50457600 |
| H  | -0.96086800 | 1.89481400  | -2.29822300 |
| Cl | -2.39710700 | -1.67320600 | -1.79628600 |
| C  | 0.62084300  | -2.15718400 | -0.59106700 |
| H  | 1.25639700  | -2.67406900 | 0.13924700  |
| H  | -0.38810000 | -2.53191400 | -0.45067800 |
| Pt | -2.27588200 | -0.24173600 | 0.09831500  |
| Cl | -1.75046000 | -2.02713600 | 1.60642000  |
| Cl | -3.36918900 | 1.39176900  | -1.25132800 |
| Cl | -2.67753400 | 1.03986400  | 2.07399100  |
| C  | 1.67571100  | 1.90344800  | 1.66241900  |
| H  | 2.71693000  | 1.71994700  | 1.94913100  |
| H  | 1.40674200  | 2.91481400  | 1.98918900  |
| H  | 1.02117500  | 1.19953200  | 2.17601300  |
| C  | 1.09706600  | -2.51378800 | -2.01052800 |
| H  | 0.44691100  | -2.05047300 | -2.75827900 |
| H  | 2.13289900  | -2.20535000 | -2.20061600 |
| H  | 1.04620300  | -3.59949500 | -2.14785500 |

**M2\_1**

|    |             |             |             |
|----|-------------|-------------|-------------|
| C  | -1.77759800 | -1.75691100 | -0.00810100 |
| C  | -0.25167900 | -1.60660300 | -0.47063800 |
| C  | -2.59123500 | -0.63111100 | -0.68310000 |
| C  | -4.04282400 | -0.47725900 | -0.33588500 |
| C  | -1.98510900 | 0.66762200  | -0.25938000 |
| C  | -4.21545100 | 0.80361200  | 0.19547700  |
| C  | -5.13598400 | -1.32158500 | -0.48420100 |
| C  | -5.45803000 | 1.29576100  | 0.57915900  |
| C  | -6.39645500 | -0.85115600 | -0.09552600 |
| H  | -5.00530100 | -2.32037400 | -0.88593300 |
| C  | -6.55318000 | 0.43854000  | 0.42342400  |
| H  | -5.59378200 | 2.29786300  | 0.97142000  |
| H  | -7.26497100 | -1.49389200 | -0.20286300 |
| H  | -7.54087900 | 0.78723300  | 0.70932400  |
| N  | -2.93994600 | 1.44967400  | 0.26075300  |
| C  | -2.75642100 | 2.69602200  | 1.01201200  |
| H  | -1.83510900 | 2.63894900  | 1.59144200  |
| H  | -2.72462600 | 3.55881700  | 0.34174000  |
| H  | -3.59589700 | 2.80108600  | 1.69919700  |
| C  | 0.24721800  | -0.15719900 | -0.23009000 |
| C  | -0.57840700 | 0.95165700  | -0.35621200 |
| H  | -2.46747600 | -0.75916500 | -1.76546300 |
| O  | -2.35141900 | -2.94570400 | -0.53555800 |
| H  | -2.09493900 | -3.68840300 | 0.03312800  |
| C  | 0.50489200  | -2.76896200 | 0.20347700  |
| H  | 1.53196600  | -2.83190900 | -0.14609800 |
| H  | 0.53088100  | -2.68854800 | 1.28763900  |
| H  | 0.01084500  | -3.70520000 | -0.08148500 |
| C  | -0.12740600 | -1.81195400 | -2.01105800 |
| H  | -0.61471800 | -2.75218500 | -2.28362500 |
| H  | -0.57547100 | -1.00055700 | -2.59343800 |
| H  | 0.92855900  | -1.86367100 | -2.28465500 |
| Cl | 2.69311400  | 1.42309200  | -1.77865000 |
| C  | -0.20911400 | 2.39411500  | -0.69609600 |
| H  | -0.51269000 | 3.09195400  | 0.08336900  |
| H  | 0.86708200  | 2.48395000  | -0.76446500 |
| Pt | 2.22638000  | 0.12076300  | 0.17081500  |
| Cl | 1.84238200  | 2.00966500  | 1.60033700  |
| Cl | 3.37188100  | -1.60877700 | -1.01155600 |
| Cl | 2.37869000  | -1.10483100 | 2.21189100  |
| C  | -1.93011600 | -1.73034500 | 1.52196600  |
| H  | -2.98763900 | -1.67039000 | 1.79492400  |
| H  | -1.52378300 | -2.64474700 | 1.96214400  |
| H  | -1.39064800 | -0.89450800 | 1.97715300  |

|            |             |             |             |
|------------|-------------|-------------|-------------|
| C          | -0.81232000 | 2.80842900  | -2.05125700 |
| H          | -0.43212000 | 2.16654700  | -2.85275300 |
| H          | -1.90962600 | 2.76728300  | -2.07107200 |
| H          | -0.51412300 | 3.83671700  | -2.28224900 |
| <b>TS2</b> |             |             |             |
| C          | 1.12091900  | 2.27894400  | -0.16280800 |
| C          | -0.16904100 | 1.72102400  | -0.95601800 |
| C          | 2.38417600  | 0.28614100  | -1.10970400 |
| C          | 3.67281100  | -0.29289400 | -0.82443300 |
| C          | 1.98299400  | 1.03426700  | 0.05663400  |
| C          | 4.02227000  | 0.11197400  | 0.48489100  |
| C          | 4.56191600  | -1.05065100 | -1.59922900 |
| C          | 5.23683400  | -0.27837000 | 1.06299200  |
| C          | 5.78026400  | -1.41332700 | -1.04081500 |
| H          | 4.29654400  | -1.34916000 | -2.60904600 |
| C          | 6.10115500  | -1.03746400 | 0.27951200  |
| H          | 5.51429500  | 0.01777000  | 2.06891900  |
| H          | 6.49153300  | -1.99437600 | -1.61892300 |
| H          | 7.05798400  | -1.33913900 | 0.69606500  |
| N          | 3.01004300  | 0.90345300  | 1.01586000  |
| C          | 2.86729400  | 1.12301700  | 2.45540500  |
| H          | 1.81890800  | 1.03114600  | 2.74353300  |
| H          | 3.42796000  | 0.35183900  | 2.98894900  |
| H          | 3.24574100  | 2.10491400  | 2.75665100  |
| C          | -0.26114700 | 0.30914700  | -0.36111900 |
| C          | 0.95175700  | -0.30086700 | -0.08313000 |
| H          | 2.01959100  | 0.48253700  | -2.10186500 |
| O          | 1.92148200  | 3.14855400  | -0.95057800 |
| H          | 1.56222600  | 4.04700500  | -0.87307000 |
| C          | -1.33271400 | 2.71091800  | -0.77657100 |
| H          | -2.21714600 | 2.35823400  | -1.30571700 |
| H          | -1.61437600 | 2.88101100  | 0.25843000  |
| H          | -1.02762900 | 3.66551600  | -1.22755200 |
| C          | 0.03388000  | 1.61348100  | -2.50851900 |
| H          | 0.80722500  | 2.31512300  | -2.83267500 |
| H          | 0.28030500  | 0.60536300  | -2.84995000 |
| H          | -0.90383900 | 1.86821400  | -3.00313900 |
| Cl         | -1.44348800 | -0.97964200 | 2.38966900  |
| C          | 1.27956800  | -1.62574100 | 0.57632000  |
| H          | 2.07224400  | -1.45665700 | 1.31478400  |
| H          | 0.40275300  | -1.91957300 | 1.14968200  |
| Pt         | -2.05575600 | -0.46497400 | 0.13098500  |
| Cl         | -3.39804400 | 1.24926900  | 1.10552600  |
| C          | 0.74171900  | 2.98364800  | 1.14486500  |

|             |             |             |             |
|-------------|-------------|-------------|-------------|
| H           | 1.64718500  | 3.27692400  | 1.68001100  |
| H           | 0.18038000  | 3.89637700  | 0.92789600  |
| H           | 0.11553700  | 2.36338200  | 1.79290500  |
| Cl          | -1.57655900 | -2.65569000 | -0.64967100 |
| Cl          | -3.02954900 | -0.05408200 | -2.00494300 |
| C           | 1.69051700  | -2.78675100 | -0.34968300 |
| H           | 1.02434900  | -2.86013800 | -1.21033500 |
| H           | 2.72079700  | -2.70346300 | -0.69964800 |
| H           | 1.60311000  | -3.72401300 | 0.20942300  |
| <b>M2_2</b> |             |             |             |
| C           | -1.38821400 | 2.08691200  | 1.00425300  |
| C           | -0.24191400 | 1.72722900  | -0.07215300 |
| C           | -2.21585200 | -0.30107200 | 0.89043300  |
| C           | -3.39266900 | -0.98942500 | 0.22529000  |
| C           | -2.48730400 | 1.13755700  | 0.62641500  |
| C           | -4.21226700 | 0.01036300  | -0.30503400 |
| C           | -3.82215200 | -2.31212600 | 0.14082500  |
| C           | -5.41725000 | -0.23406000 | -0.95265500 |
| C           | -5.02837300 | -2.59058700 | -0.51282200 |
| H           | -3.24418100 | -3.12128300 | 0.56893100  |
| C           | -5.81274100 | -1.56985100 | -1.05830200 |
| H           | -6.03072700 | 0.56128900  | -1.36151900 |
| H           | -5.35939600 | -3.62120100 | -0.59526500 |
| H           | -6.74256700 | -1.81221000 | -1.56312600 |
| N           | -3.61317700 | 1.28646200  | -0.03745200 |
| C           | -4.26314100 | 2.49666200  | -0.55032100 |
| H           | -4.26925700 | 2.45438800  | -1.64284400 |
| H           | -5.29184200 | 2.51875700  | -0.18233200 |
| H           | -3.74149500 | 3.38484400  | -0.21893200 |
| C           | 0.15071800  | 0.22902700  | 0.17083400  |
| C           | -0.75255600 | -0.71441900 | 0.52505700  |
| H           | -2.29069000 | -0.43237000 | 1.98207500  |
| O           | -0.98158300 | 1.74467400  | 2.32492500  |
| H           | -0.24405700 | 1.10863000  | 2.26974500  |
| Pt          | 2.11653700  | -0.30284200 | -0.23774500 |
| C           | -0.59465500 | -2.21111200 | 0.70494600  |
| H           | 0.40747900  | -2.51529400 | 0.43192000  |
| H           | -1.25507100 | -2.70263100 | -0.01922300 |
| C           | -0.76232400 | 1.84340600  | -1.52721100 |
| H           | 0.07554500  | 1.67497100  | -2.20714900 |
| H           | -1.52625100 | 1.09742600  | -1.76859900 |
| H           | -1.15951500 | 2.84654500  | -1.72631900 |
| C           | 0.84609900  | 2.79935600  | 0.13494400  |
| H           | 1.17227300  | 2.86110600  | 1.17352400  |

|    |             |             |             |
|----|-------------|-------------|-------------|
| H  | 1.71419300  | 2.59401200  | -0.48465300 |
| H  | 0.44747900  | 3.76985500  | -0.17493100 |
| Cl | 2.56288400  | 1.04442900  | -2.16630800 |
| Cl | 3.34603500  | 1.18808700  | 1.16250000  |
| Cl | 2.42487700  | -1.84068500 | 1.56535200  |
| Cl | 1.42786400  | -1.97241800 | -1.80152000 |
| C  | -1.75501100 | 3.57439400  | 1.08276100  |
| H  | -1.89139200 | 4.04325500  | 0.10567500  |
| H  | -2.65857300 | 3.70788200  | 1.68708300  |
| H  | -0.94557200 | 4.08990200  | 1.59816000  |
| C  | -0.88731900 | -2.71504600 | 2.12860900  |
| H  | -1.91813800 | -2.53772800 | 2.46343200  |
| H  | -0.71523200 | -3.79587700 | 2.17060600  |
| H  | -0.20466600 | -2.24847300 | 2.84497400  |

References:

- (1) (a) Dess, D. B.; Martin, J. C. *J. Org. Chem.*, **1983**, *48*, 4156. (b) Hirose, T.; Noguchi, Y.; Furuya, Y.; Ishiyama, A.; Iwatsuki, M.; Otaguro, K.; Ōmura, S.; Sunazuka, T. *Chem. Eur. J.*, **2013**, *19*, 10741.
- (2) (a) Qiu, Y.; Kong, W.; Fu, C.; Ma, S. *Org. Lett.*, **2012**, *14*, 6198. (b) Qiu, Y.; Ma, D.; Kong, W.; Fu, C.; Ma, S. *Org. Chem. Front.*, **2014**, *1*, 62.
- (3) Gaussian 09, Revision A.01, Frisch, M. J.; Trucks, G. W.; Schlegel, H. B.; Scuseria, G. E.; Robb, M. A.; Cheeseman, J. R.; Scalmani, G.; Barone, V.; Mennucci, B.; Petersson, G. A.; Nakatsuji, H.; Caricato, M.; Li, X.; Hratchian, H. P.; Izmaylov, A. F.; Bloino, J.; Zheng, G.; Sonnenberg, J. L.; Hada, M.; Ehara, M.; Toyota, K.; Fukuda, R.; Hasegawa, J.; Ishida, M.; Nakajima, T.; Honda, Y.; Kitao, O.; Nakai, H.; Vreven, T.; Montgomery, Jr., J. A.; Peralta, J. E.; Ogliaro, F.; Bearpark, M.; Heyd, J. J.; Brothers, E.; Kudin, K. N.; Staroverov, V. N.; Kobayashi, R.; Normand, J.; Raghavachari, K.; Rendell, A.; Burant, J. C.; Iyengar, S. S.; Tomasi, J.; Cossi, M.; Rega, N.; Millam, J. M.; Klene, M.; Knox, J. E.; Cross, J. B.; Bakken, V.; Adamo, C.; Jaramillo, J.; Gomperts, R.; Stratmann, R. E.; Yazyev, O.; Austin, A. J.; Cammi, R.; Pomelli, C.; Ochterski, J. W.; Martin, R. L.; Morokuma, K.; Zakrzewski, V. G.; Voth, G. A.; Salvador, P.; Dannenberg, J. J.; Dapprich, S.; Daniels, A. D.; Farkas, O.; Foresman, J. B.; Ortiz, J. V.; Cioslowski, J. and Fox, D. J., Gaussian, Inc., Wallingford CT, **2009**.
- (4) (a) Becke, A. D. *J. Chem. Phys.* **1993**, *98*, 5648. (b) Lee, C.; Yang, W.; Parr, R. *Phys. Rev. B* **1988**, *37*, 785.



- (5) For reviews of density-functional methods, see: (a) Parr, R. G.; Yang, W. *Density Functional Theory of Atoms and Molecules*; Oxford University Press: New York, 1989. (b) Ziegler, T. *Chem. Rev.* **1991**, *91*, 651. (c) *Density Functional Methods in Chemistry*; Labanowski, J., Andzelm, J., Eds.; Springer: Berlin, **1991**.
- (6) (a) Hay, P. J.; Wadt, W. R. *J. Chem. Phys.* **1985**, *82*, 270. (b) Wadt, W. R.; Hay, P. *J. J. Chem. Phys.* **1985**, *82*, 284.
- (7) (a) Barone, V.; Cossi, M. *J. Phys. Chem. A* **1998**, *102*, 1995; (b) Cossi, M.; Rega, N.; Scalmani, G.; Barone, V. *J. Comput. Chem.* **2003**, *24*, 669; (c) Takano, Y.; Houk, K. N. *J. Chem. Theory Comput.* **2005**, *1*, 70.

7.565  
7.562  
7.558  
7.536  
7.532  
7.339  
7.337  
7.311  
7.309  
7.210  
7.199  
7.195  
7.176  
7.172  
7.168  
7.149  
7.145  
7.095  
7.092  
7.072  
7.069  
7.067  
7.046  
7.043  
6.336  
4.999  
4.975  
4.952  
4.929  
4.905  
4.881  
4.316  
4.294  
4.271  
4.247  
4.224  
4.201  
2.503  
2.241  
2.218  
2.194  
1.809  
1.543  
1.513  
1.503  
1.490  
1.465  
1.454  
1.429  
1.398  
1.374  
1.351  
1.242  
1.168  
0.953  
0.929  
0.905  
0.000

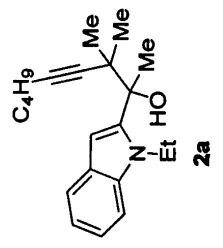

spect, CDCl3,  
Mon Apr 07 11:33:04 2014  
USER: nmr  
SOLVENT:  
Experiment = z930  
Pulse length = 14.000 usec  
Recycle delay = 1.000 sec  
NA = 8  
PTS1d = 32768  
F1 = 300.131866 MHz  
F2 = 1.000000 MHz  
SW1 = 6188.12 Hz

zj-1-036

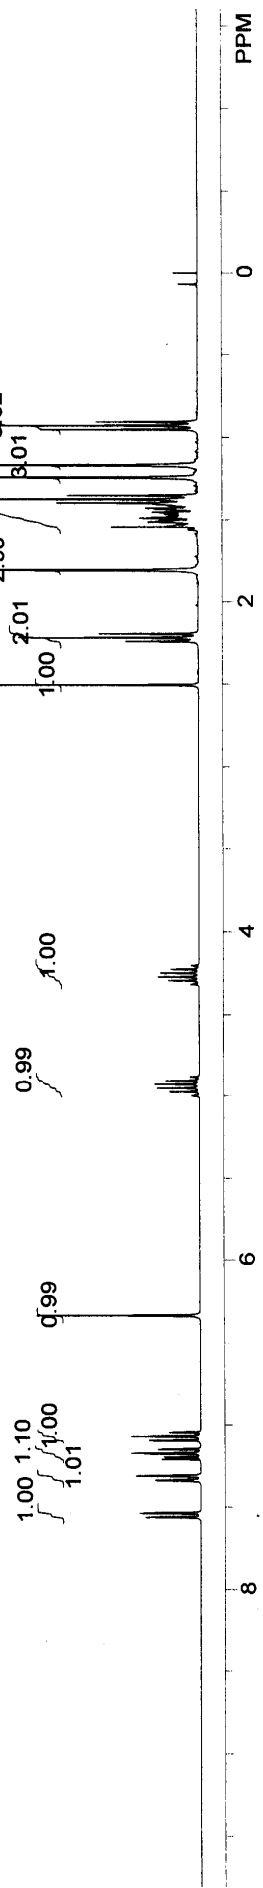

spect. CDCl3,  
 Mon Apr 07 11:34:48 2014  
 USER: nmr  
 SOLVENT:  
 Experiment = zgpg30  
 Pulse length = 9.500 usec  
 Recycle delay = 2.000 sec  
 NA = 327  
 PTS1d = 32768  
 F1 = 75.476807 MHz  
 F2 = 1.000000 MHz  
 SW1 = 22727.27 Hz

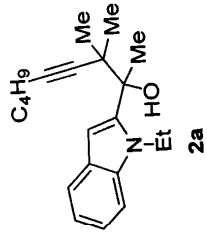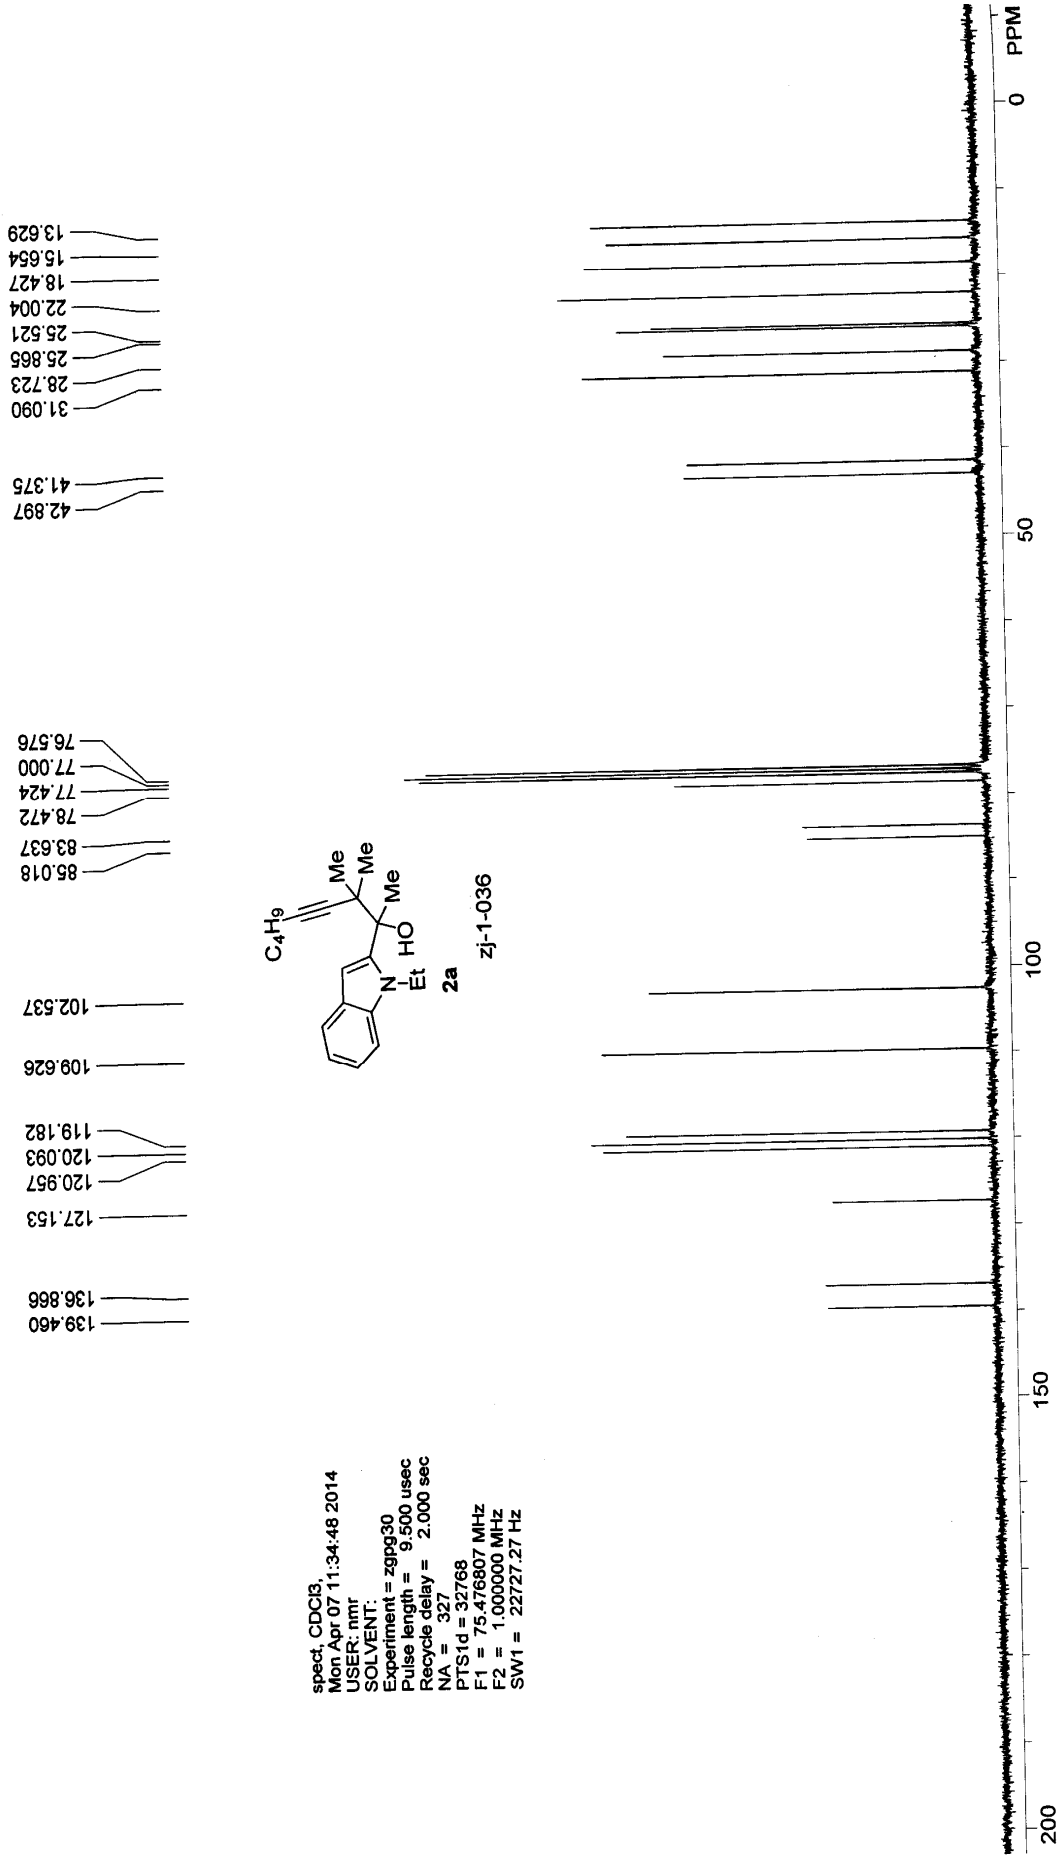

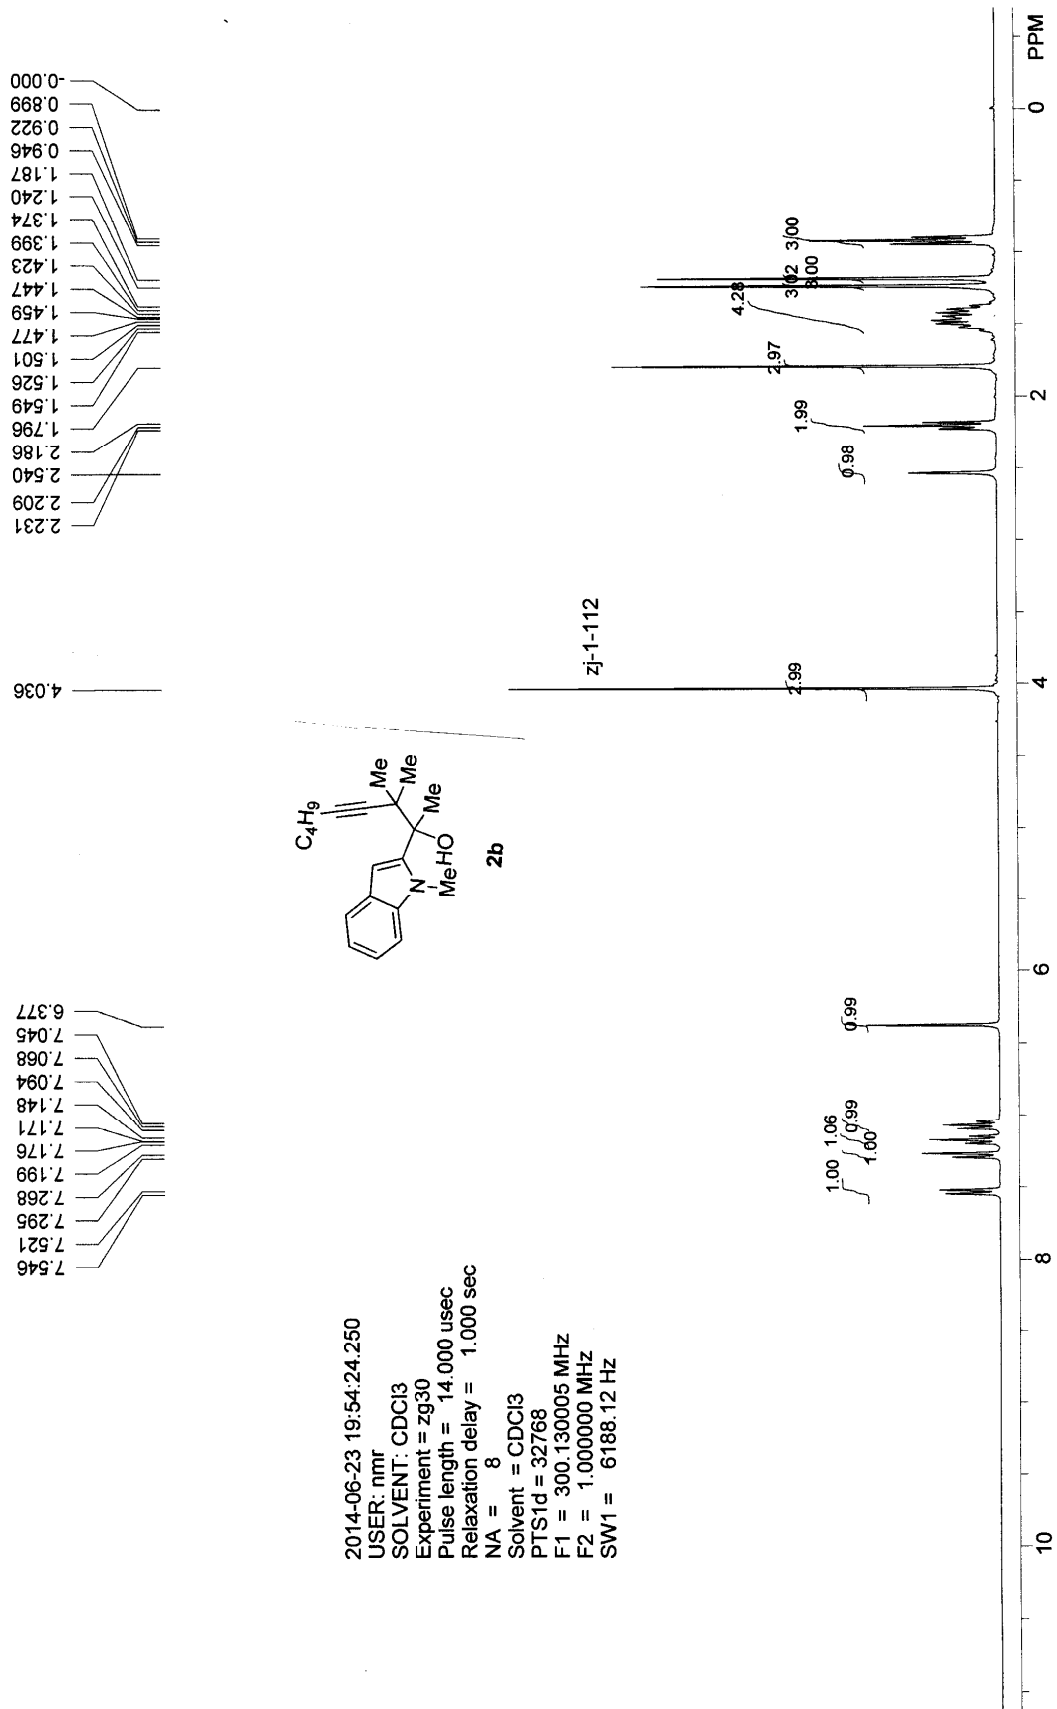

2014-06-23 19:54:24.250  
 USER: nmr  
 SOLVENT: CDCl3  
 Experiment = zg30  
 Pulse length = 14.000 usec  
 Relaxation delay = 1.000 sec  
 NA = 8  
 Solvent = CDCl3  
 PTS1d = 32768  
 F1 = 300.130005 MHz  
 F2 = 1.000000 MHz  
 SW1 = 6188.12 Hz

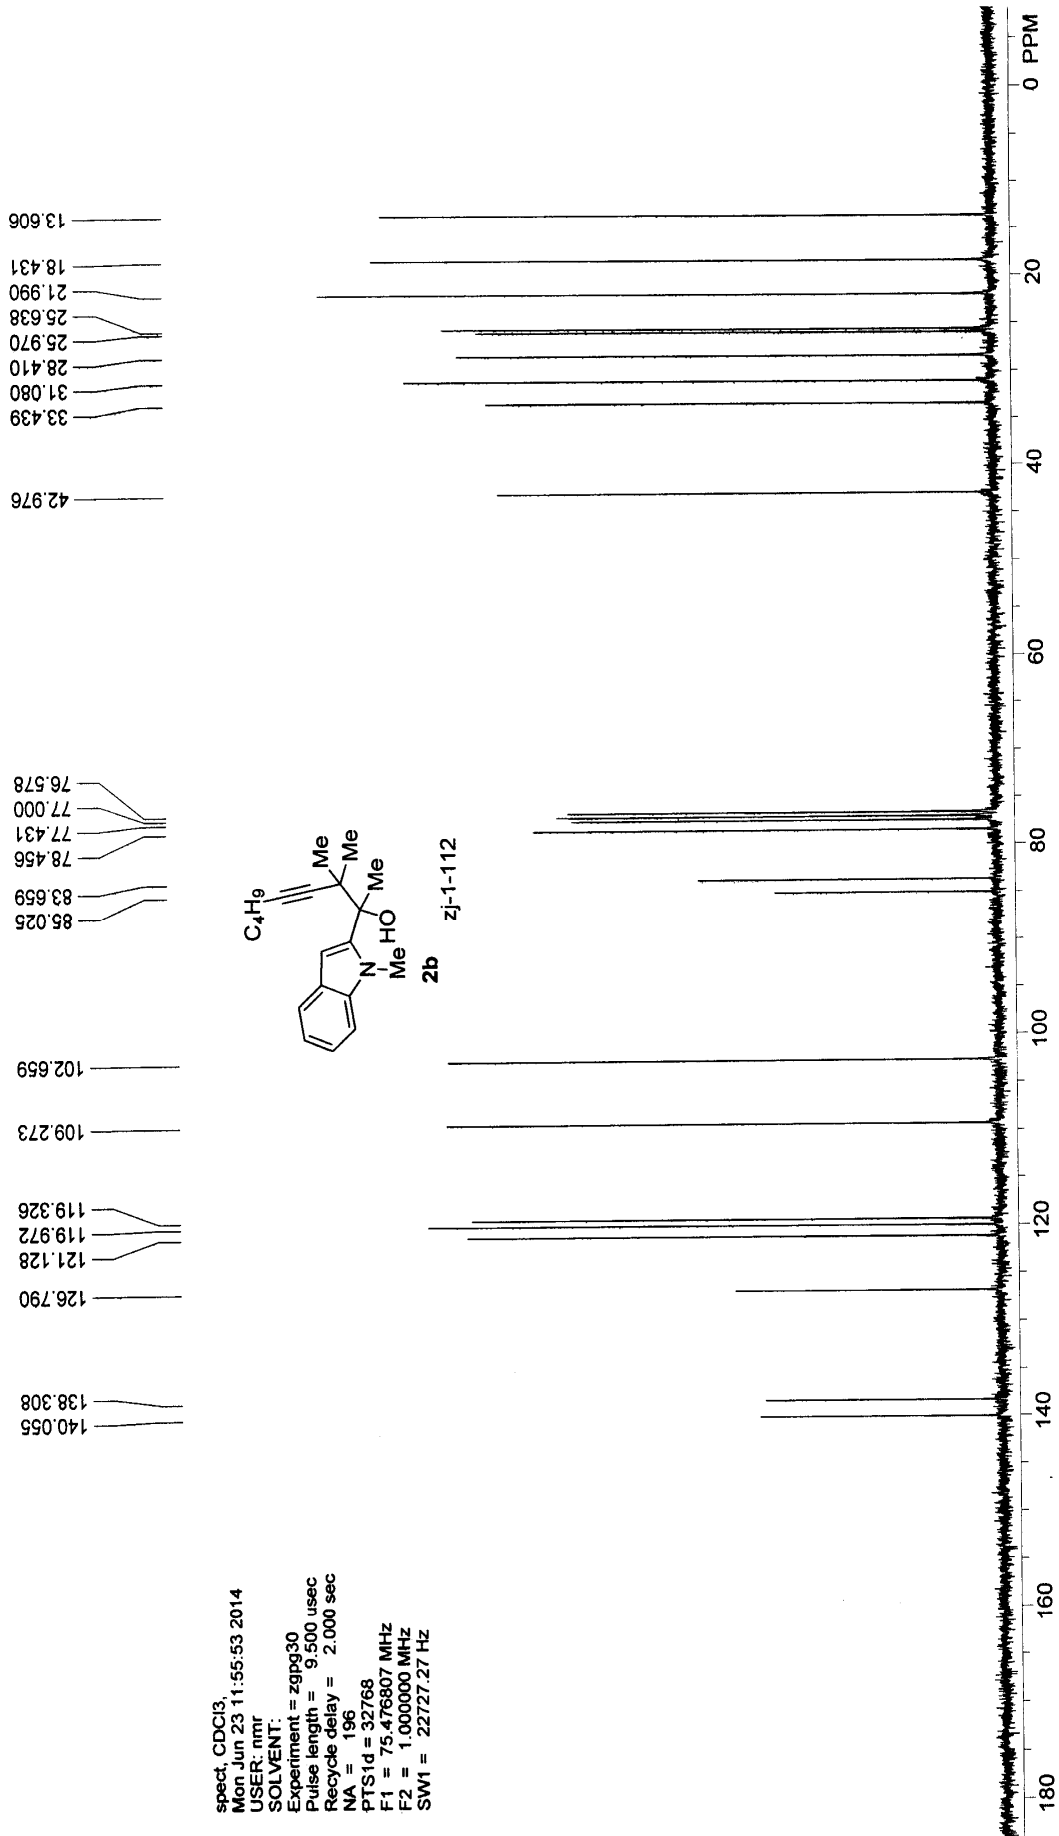

spect, CDCI3  
 Mon Jun 23 11:55:53 2014  
 USER: nmr  
 SOLVENT:  
 Experiment = zgpg30  
 Pulse length = 9.500 usec  
 Recycle delay = 2.000 sec  
 NA = 196  
 P1 = 32768  
 F1 = 75.476807 MHz  
 F2 = 1.000000 MHz  
 SW1 = 22727.27 Hz

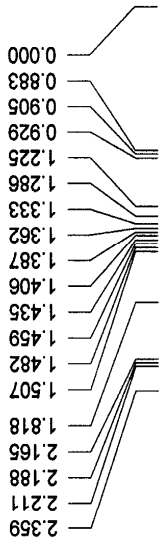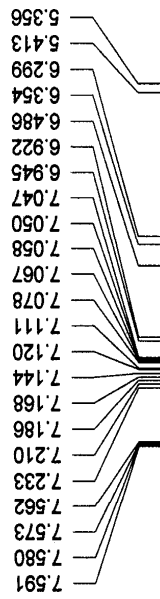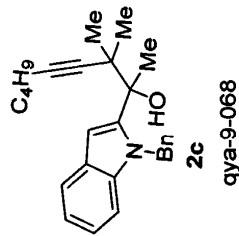

spect, CDCl3,  
 Fri Nov 15 02:35:26 2013  
 USER: nmr  
 SOLVENT:  
 Experiment = zg30  
 Pulse length = 14.000 usec  
 Recycle delay = 1.000 sec  
 NA = 8  
 PTS1d = 32768  
 F1 = 300.131866 MHz  
 F2 = 1.000000 MHz  
 SW1 = 6188.12 Hz

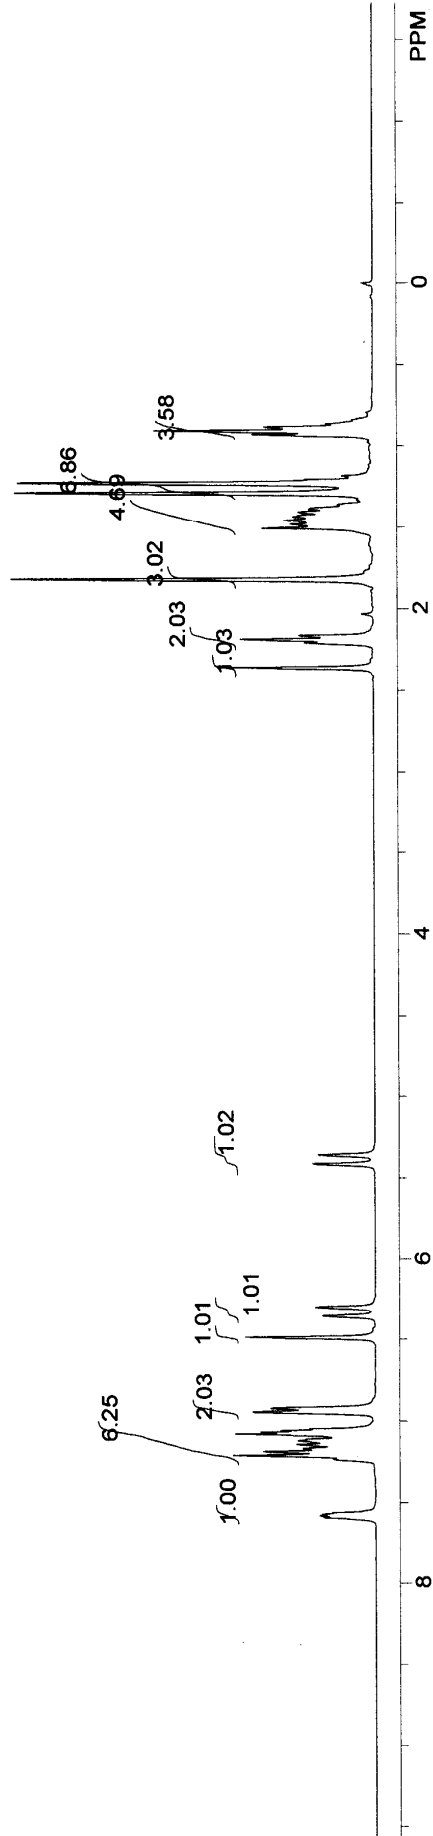

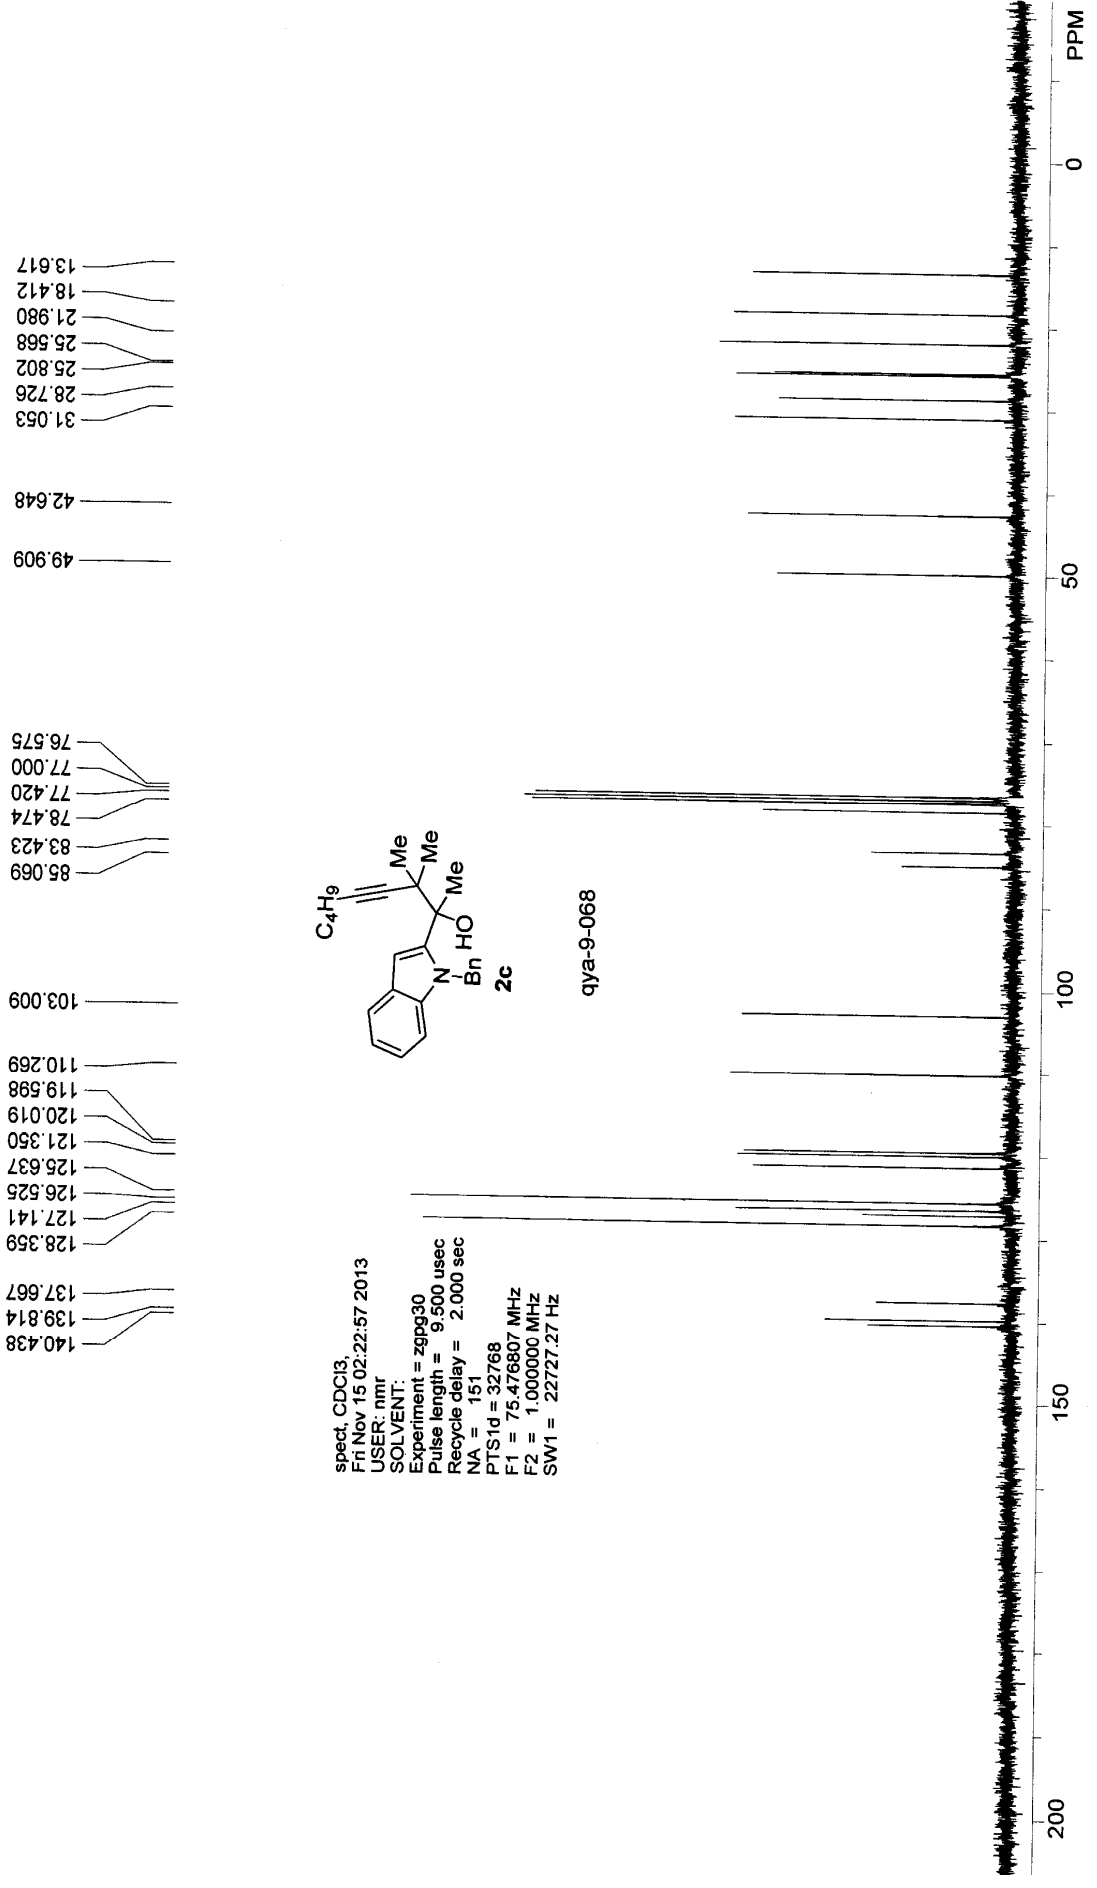

spect, CDCl3  
 Fri Nov 15 02:22:57 2013  
 USER: nmr  
 SOLVENT:  
 Experiment = zgpg30  
 Pulse length = 9.500 usec  
 Recycle delay = 2.000 sec  
 NA = 151  
 PTS1d = 32768  
 F1 = 75.476807 MHz  
 F2 = 1.000000 MHz  
 SW1 = 22727.27 Hz

2014-05-31 14:53:12.046  
 USER: nmr  
 SOLVENT: CDCl3  
 Experiment = zg30  
 Pulse length = 14.000 usec  
 Relaxation delay = 1.000 sec  
 NA = 10  
 Solvent = CDCl3  
 PTS1d = 32768  
 F1 = 300.130005 MHz  
 F2 = 1.000000 MHz  
 SW1 = 6188.12 Hz

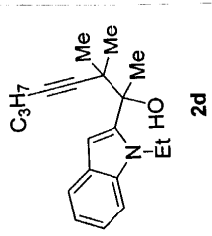

zj-1-087

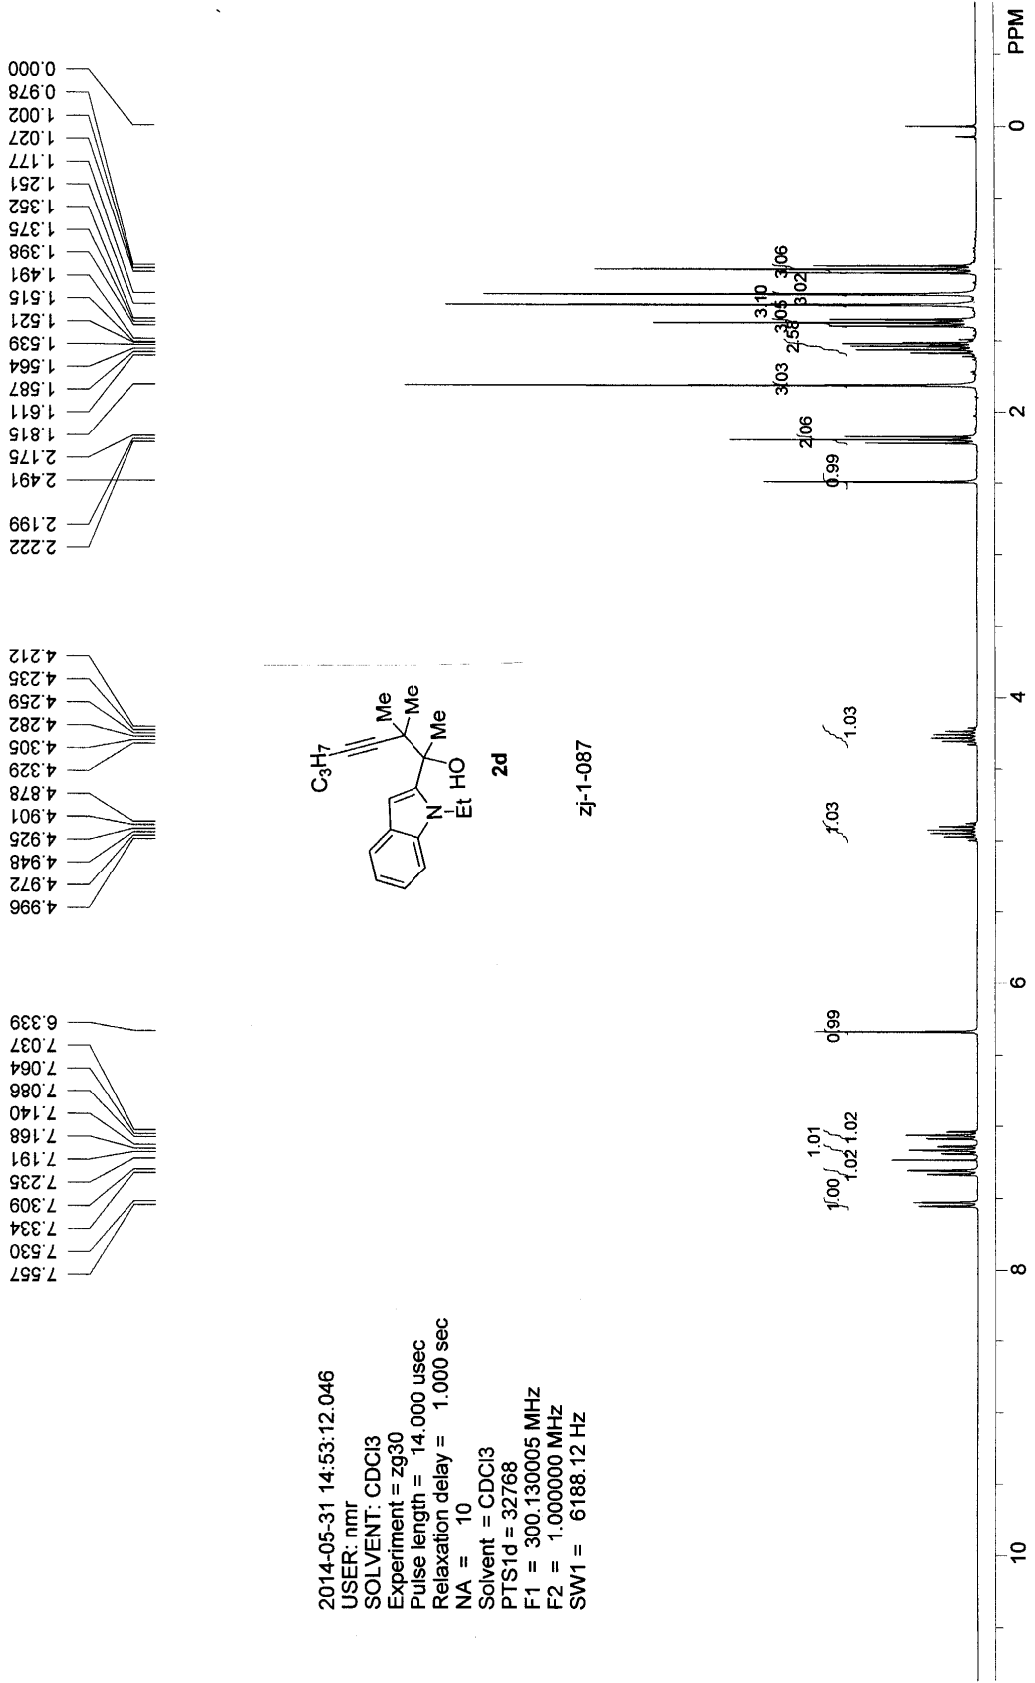



28.739  
25.906  
25.579  
22.434  
20.748  
15.648  
13.522

42.948  
41.391

85.312  
83.523  
78.505  
77.424  
77.000  
76.576

102.587

109.648

119.214

120.120

120.985

127.231

136.946

139.554

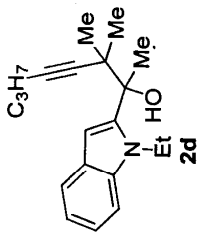

spect. CDCl3,  
Sun Jun 01 02:36:55 2014  
USER: nmr  
SOLVENT:  
Experiment = zgpg30  
Pulse length = 9.500 usec  
Recycle delay = 2.000 sec  
NA = 2517  
PTSD = 32768  
F1 = 75.476807 MHz  
F2 = 1.000000 MHz  
SW1 = 22727.27 Hz

zj-1-87

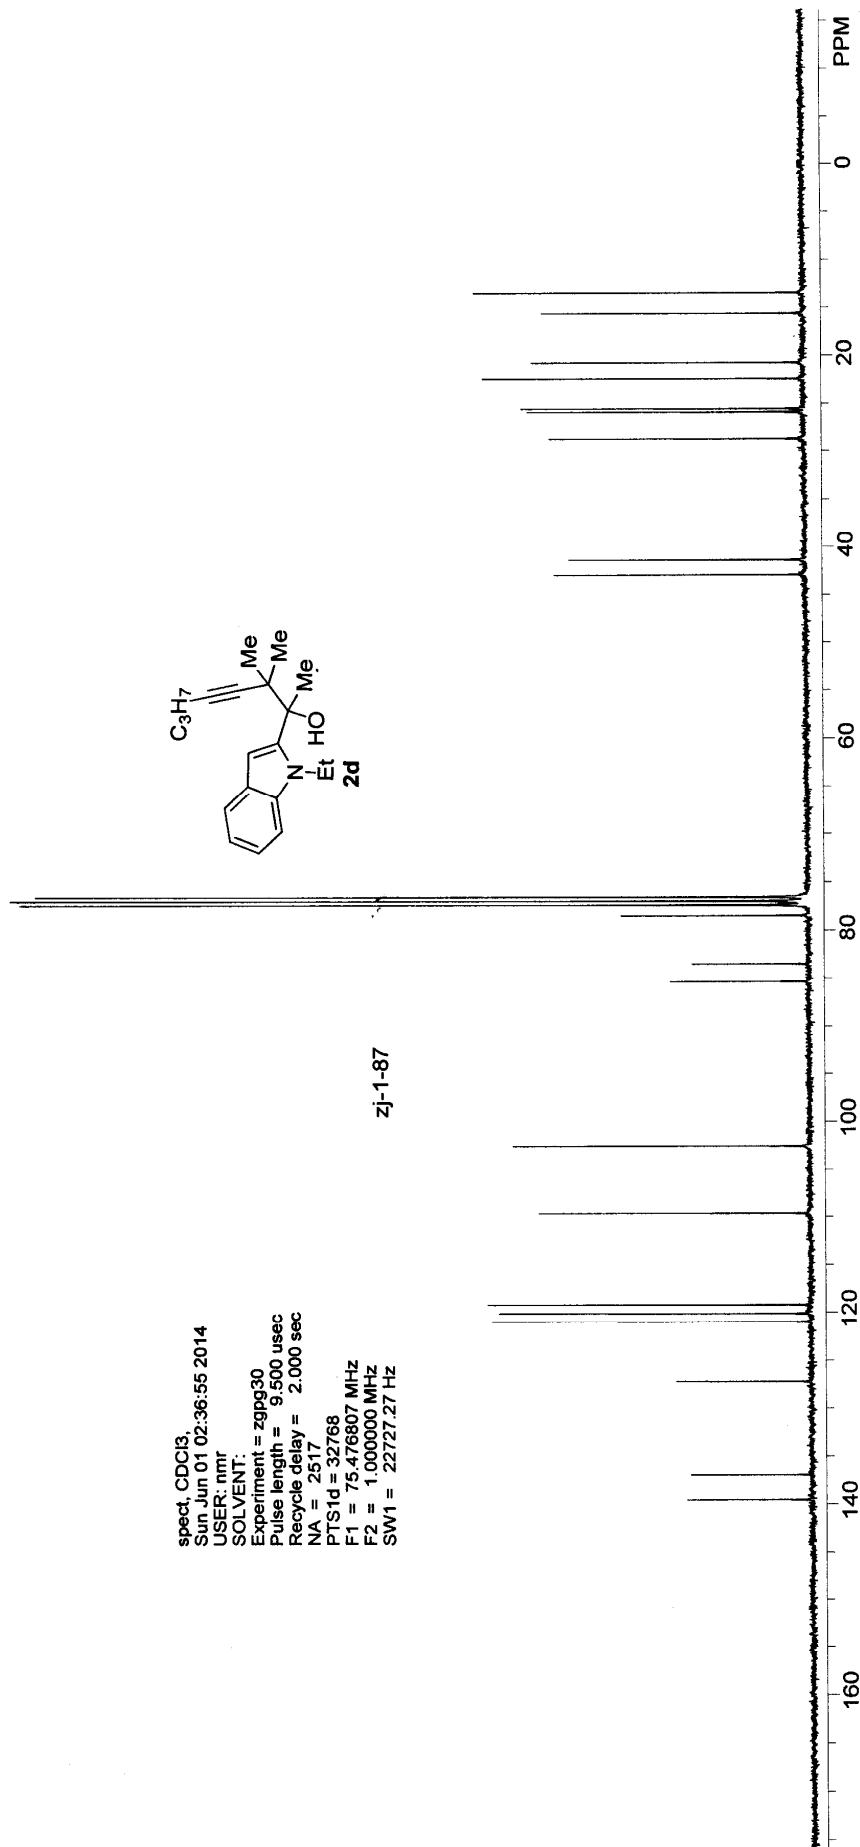

2014-03-17 21:08:40.625  
 USER: nmr  
 SOLVENT: CDCl3  
 Experiment = zg30  
 Pulse length = 14.000 usec  
 Relaxation delay = 1.000 sec  
 NA = 8  
 Solvent = CDCl3  
 PTS1d = 32768  
 F1 = 300.130005 MHz  
 F2 = 1.000000 MHz  
 SW1 = 6188.12 Hz

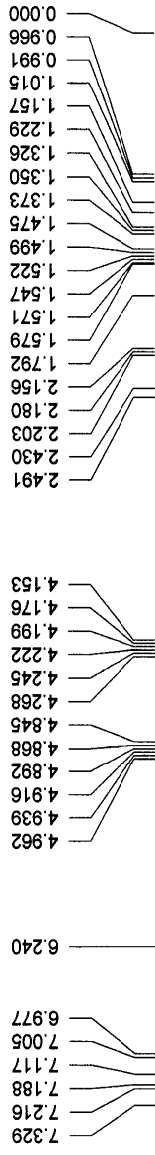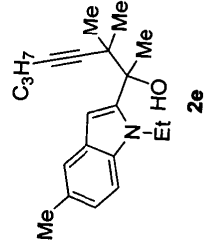

zi-1-012

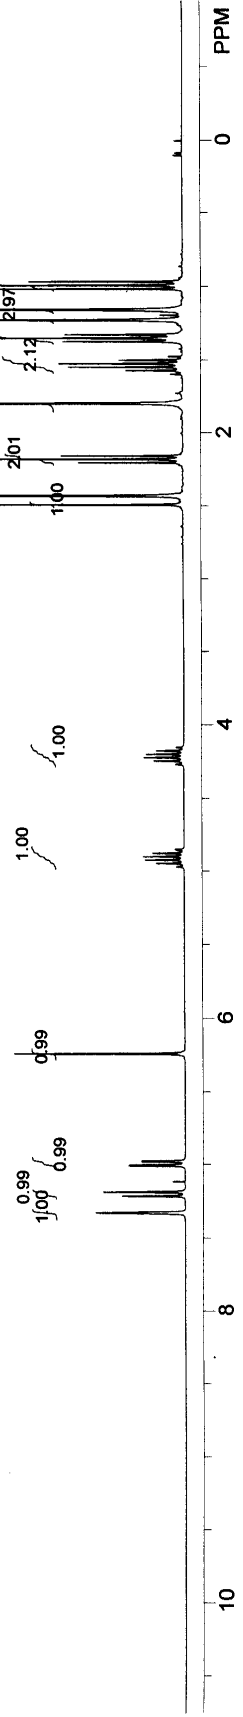

139.395  
 135.250  
 128.326  
 127.367  
 122.545  
 119.704  
 109.313  
 102.009  
 85.260  
 83.408  
 78.414  
 77.425  
 77.000  
 76.575  
 42.891  
 41.350  
 28.633  
 25.839  
 25.470  
 22.391  
 21.294  
 20.688  
 15.653  
 13.499

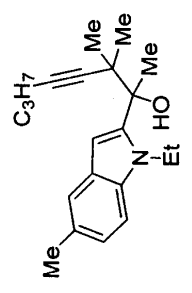

**2e**  
 zj-1-012

spect. CDCl<sub>3</sub>  
 Mon Mar 17 13:11:08 2014  
 USER: nmr  
 SOLVENT: zppg30  
 Experiment = zppg30  
 Pulse length = 9.500 usec  
 Recycle delay = 2.000 sec  
 NA = 184  
 PTS1d = 32768  
 F1 = 75.476807 MHz  
 F2 = 1.000000 MHz  
 SW1 = 22727.27 Hz

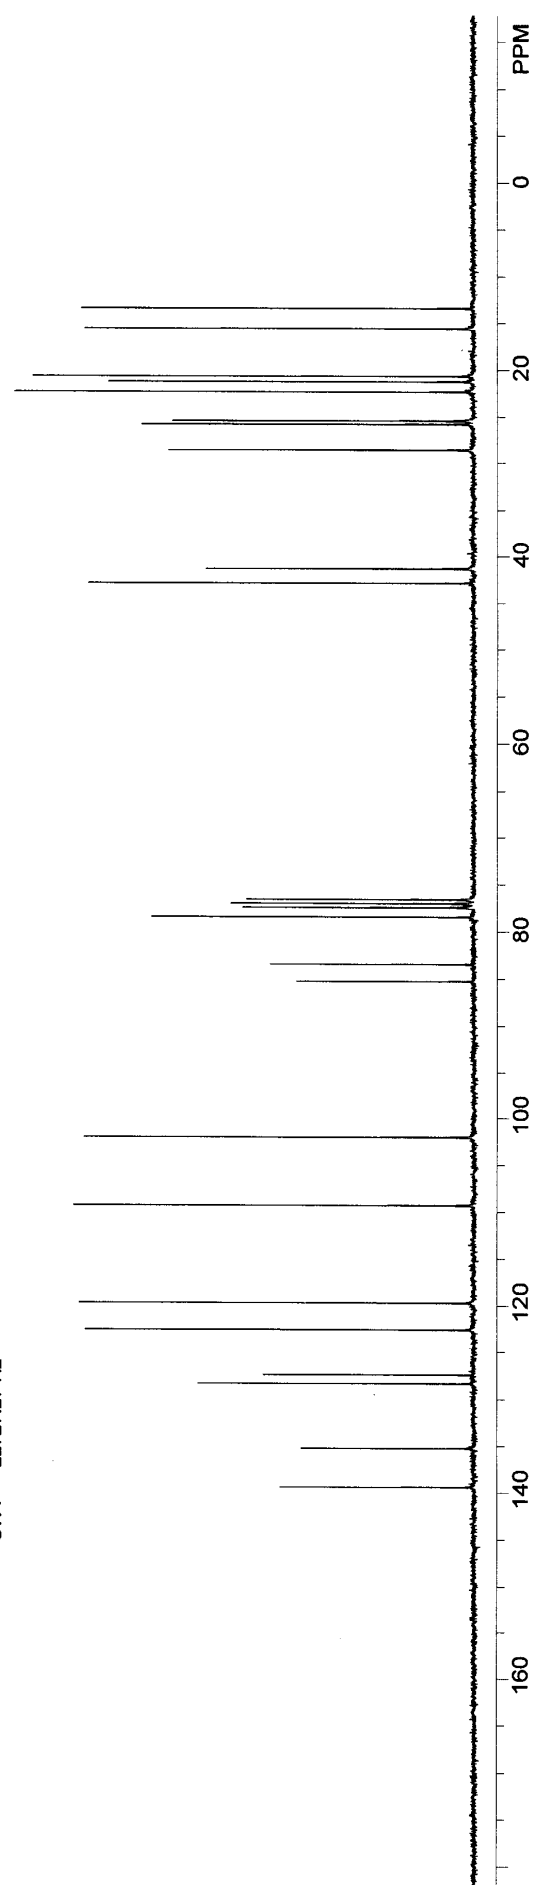

specd, CDC13,  
 Sat Jul 12 02:38:09 2014  
 USER: nmr  
 SOLVENT:  
 Experiment = zg30  
 Pulse length = 14.000 usec  
 Recycle delay = 1.000 sec  
 NA = 8  
 P1 = 32768  
 F1 = 300.131866 MHz  
 F2 = 1.000000 MHz  
 SW1 = 6188.12 Hz

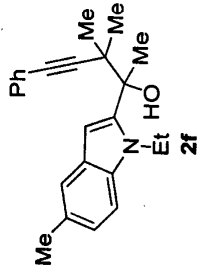

qya-9-132

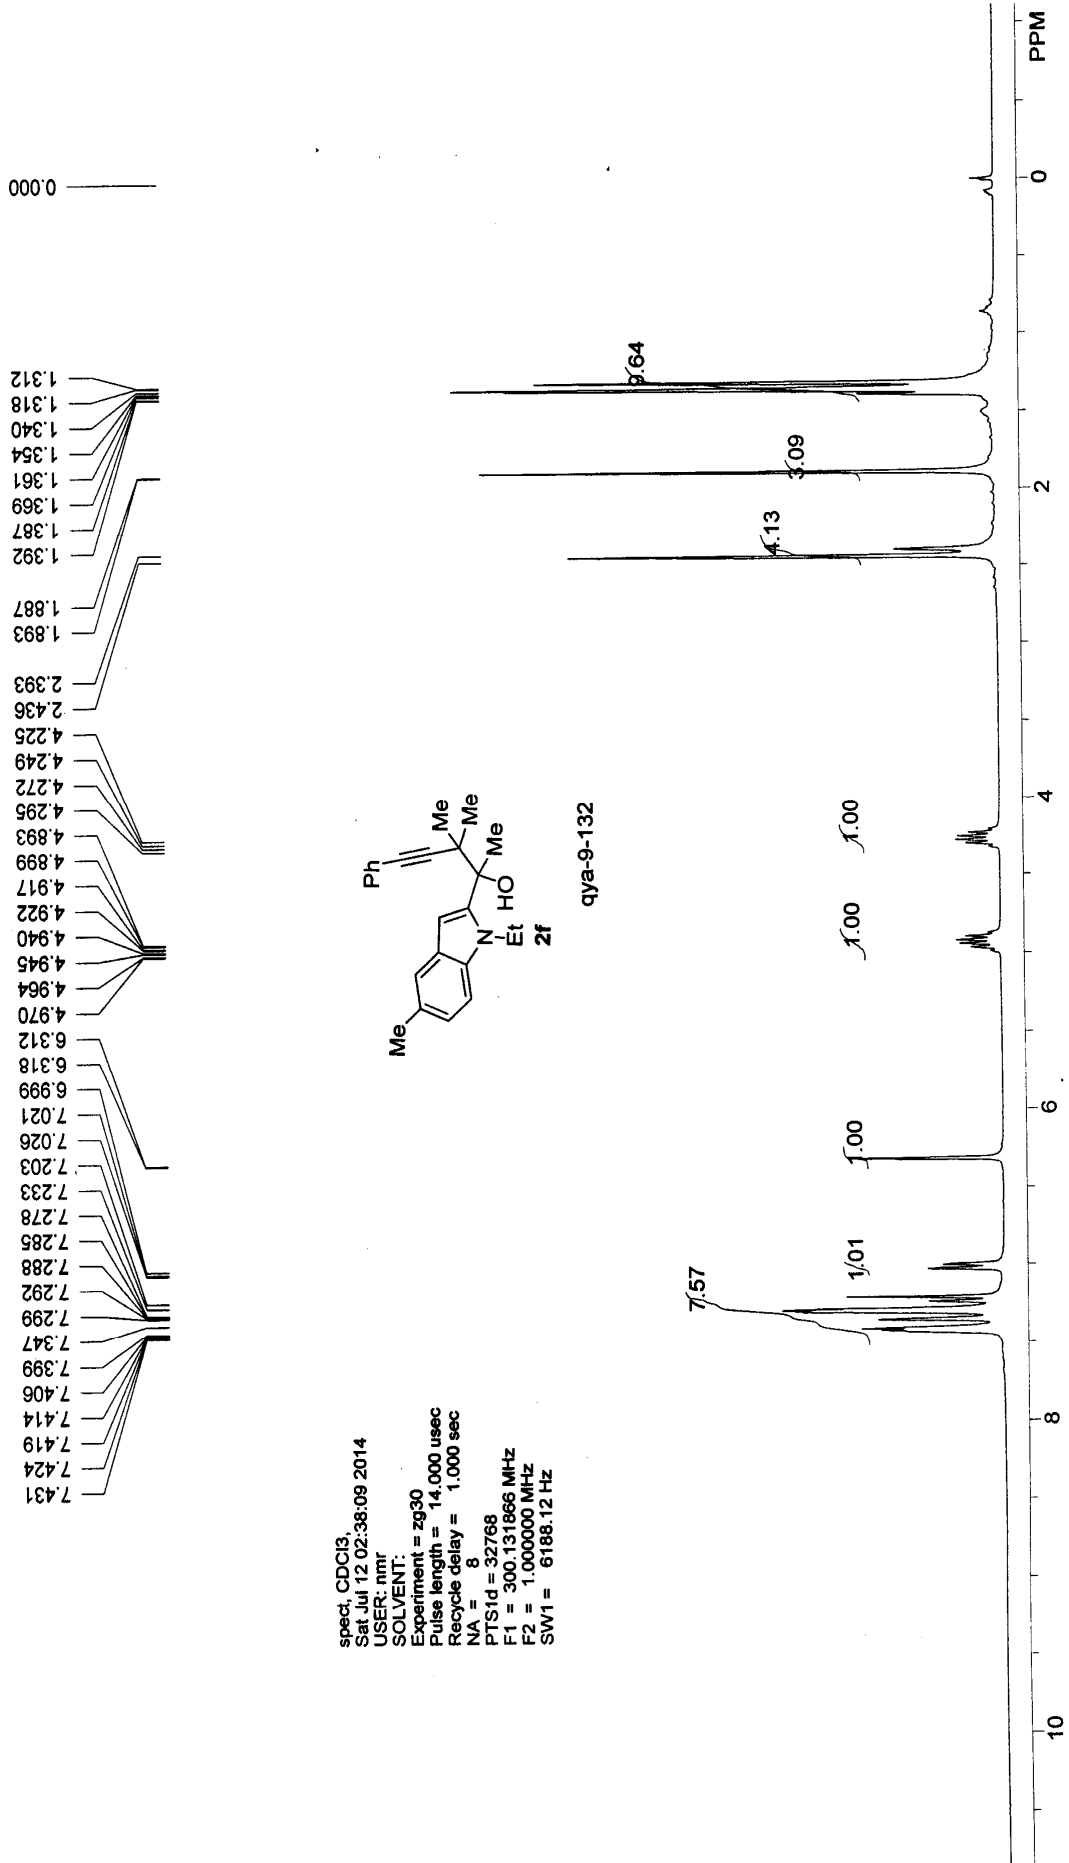

spect, CDC13,  
 Sat Jul 12 02:40:56 2014  
 USER: nmr  
 SOLVENT:  
 Experiment = zgpg30  
 Pulse length = 9.500 usec  
 Recycle delay = 2.000 sec  
 NA = 491  
 PTS1d = 32768  
 F1 = 75.476807 MHz  
 F2 = 1.000000 MHz  
 SW1 = 22727.27 Hz

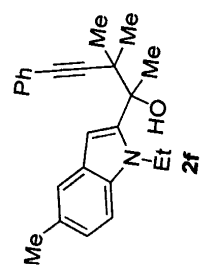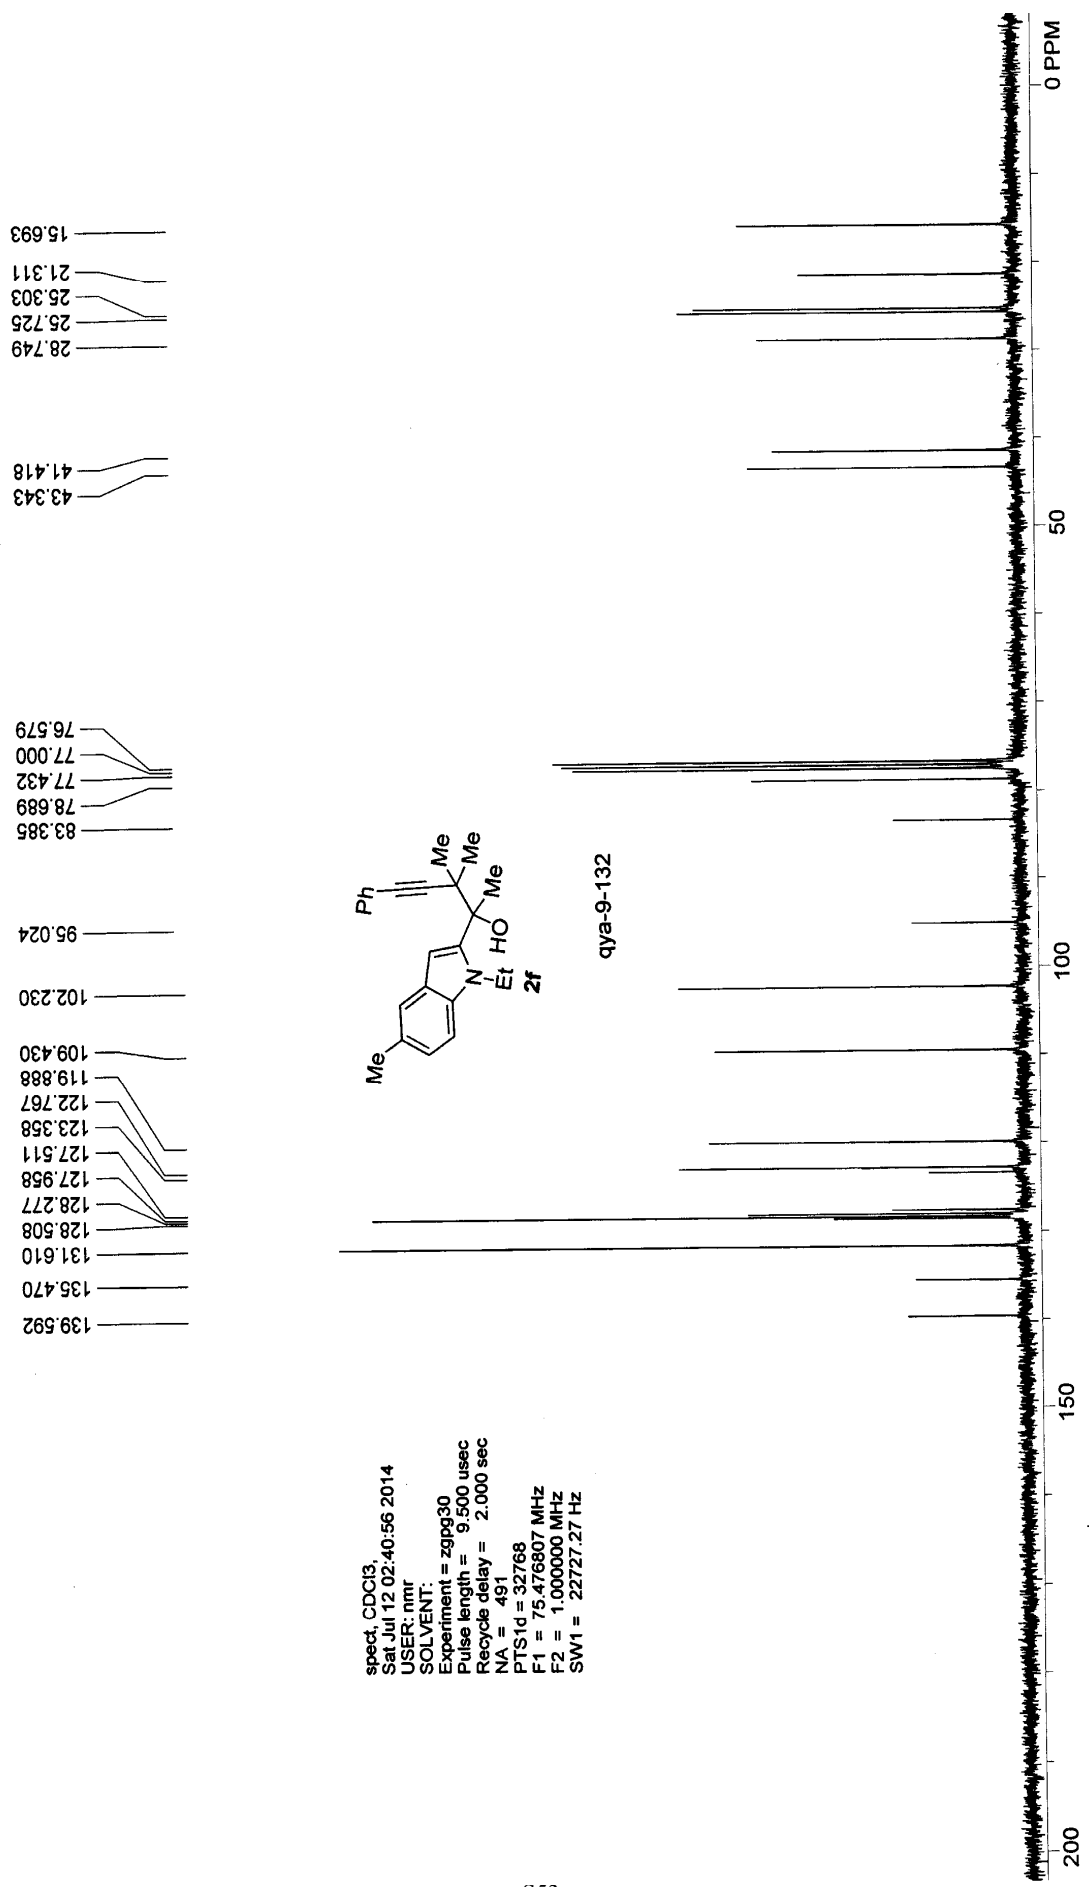

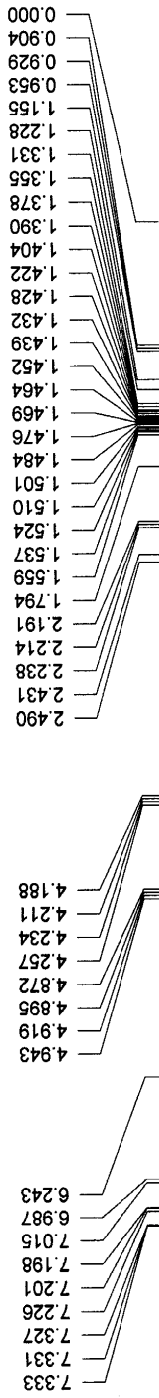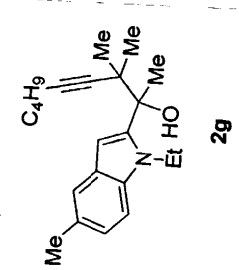

2014-03-28 21:32:15.640  
 USER: nmr  
 SOLVENT: CDCl3  
 Experiment = zg30  
 Pulse length = 14.000 usec  
 Relaxation delay = 1.000 sec  
 NA = 8  
 Solvent = CDCl3  
 PTS1d = 32768  
 F1 = 300.130005 MHz  
 F2 = 1.000000 MHz  
 SW1 = 6188.12 Hz

zj-1-024

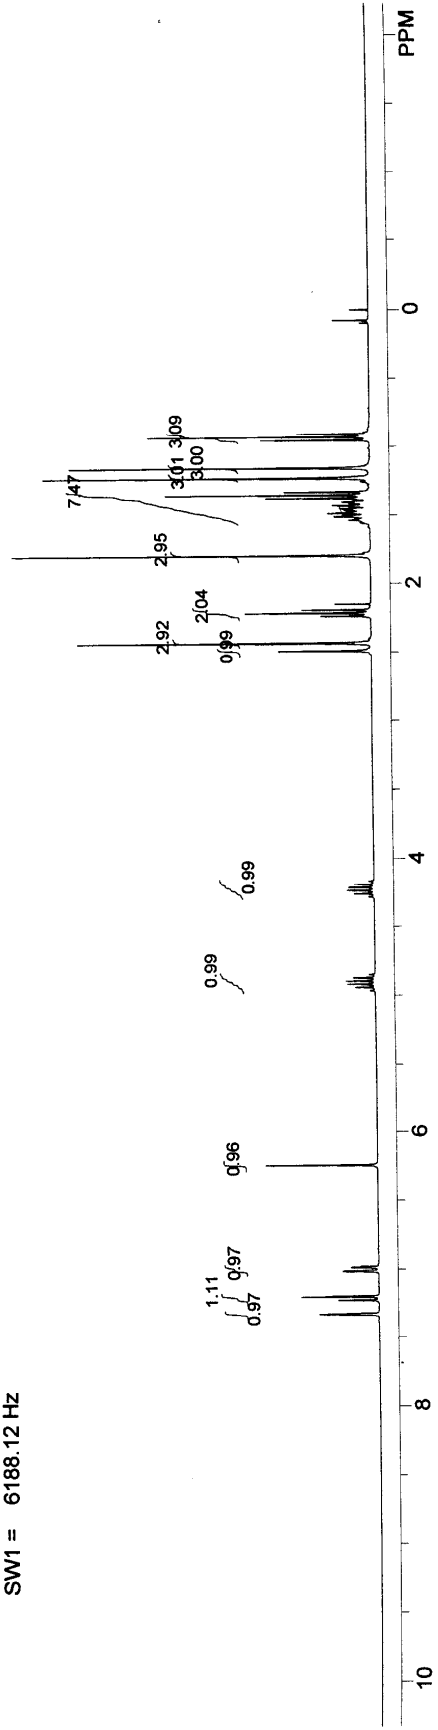

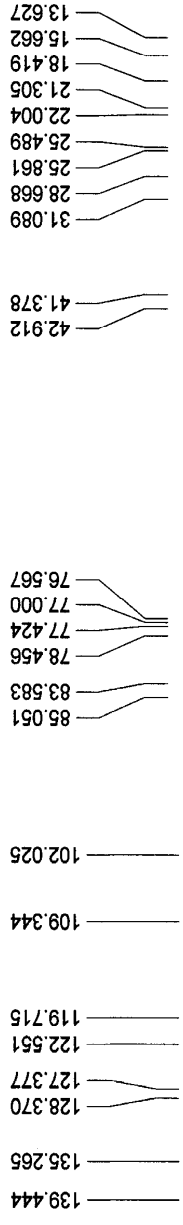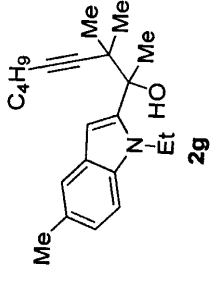

zj-1-024

spect, CDCl3,  
Fri Mar 28 13:33:44 2014  
USER: nmr  
SOLVENT:   
Experiment = zgpg30  
Pulse length = 9.500 usec  
Recycle delay = 2.000 sec  
NA = 96  
PTS1d = 32768  
F1 = 75.476807 MHz  
F2 = 1.000000 MHz  
SW1 = 22727.27 Hz

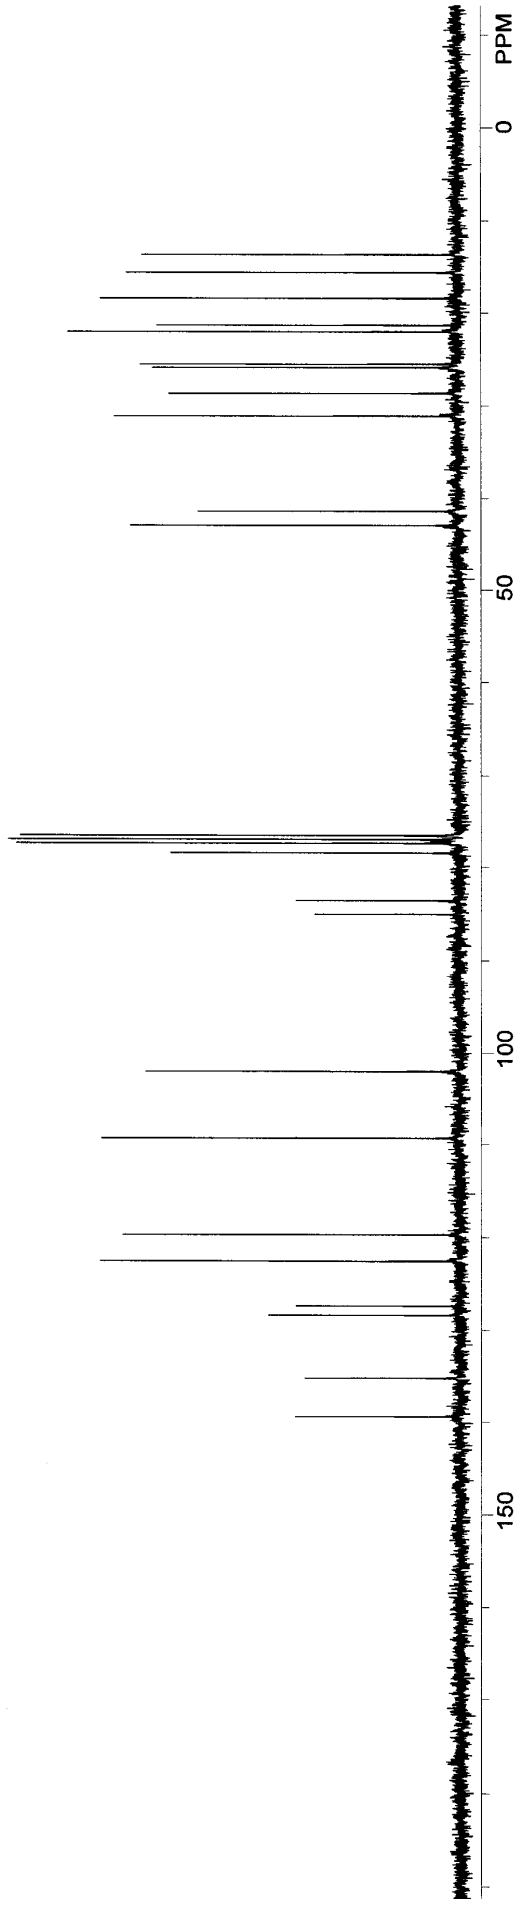

2.339  
2.209  
2.187  
2.163  
1.802  
1.530  
1.508  
1.496  
1.481  
1.472  
1.459  
1.448  
1.435  
1.423  
1.409  
1.399  
1.385  
1.376  
1.350  
1.270  
1.211  
0.929  
0.905  
0.882  
-0.000

7.682  
7.238  
7.218  
7.213  
7.198  
7.194  
7.180  
7.175  
7.157  
7.146  
7.140  
7.117  
7.110  
6.989  
6.960  
6.918  
6.913  
6.891  
6.418  
6.349  
6.294  
5.361  
5.306

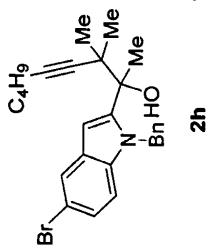

2014-06-02 19:39:36.437  
 USER: nmr  
 SOLVENT: CDCl3  
 Experiment = zg30  
 Pulse length = 14,000 usec  
 Relaxation delay = 1,000 sec  
 NA = 8  
 Solvent = CDCl3  
 PTS1d = 32768  
 F1 = 300.130005 MHz  
 F2 = 1,000000 MHz  
 SW1 = 6188.12 Hz

zj-1-056

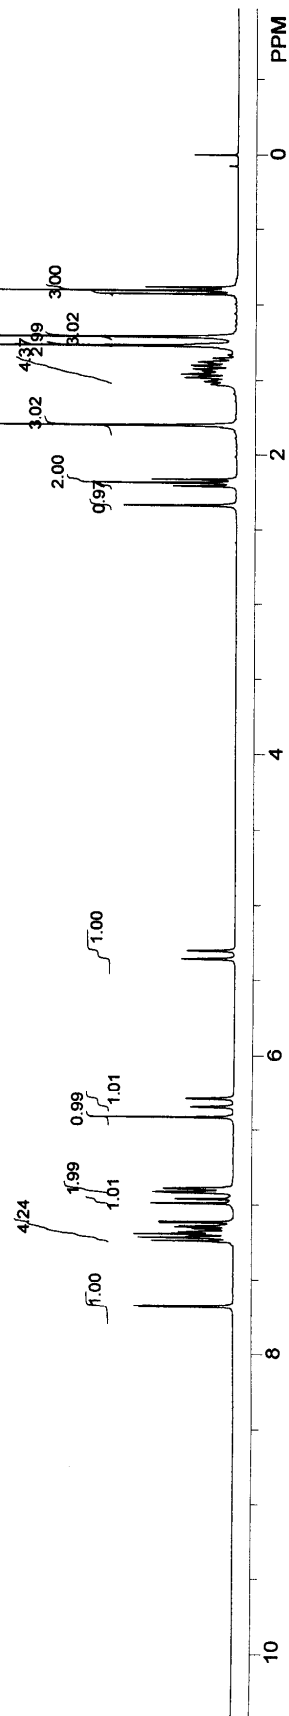



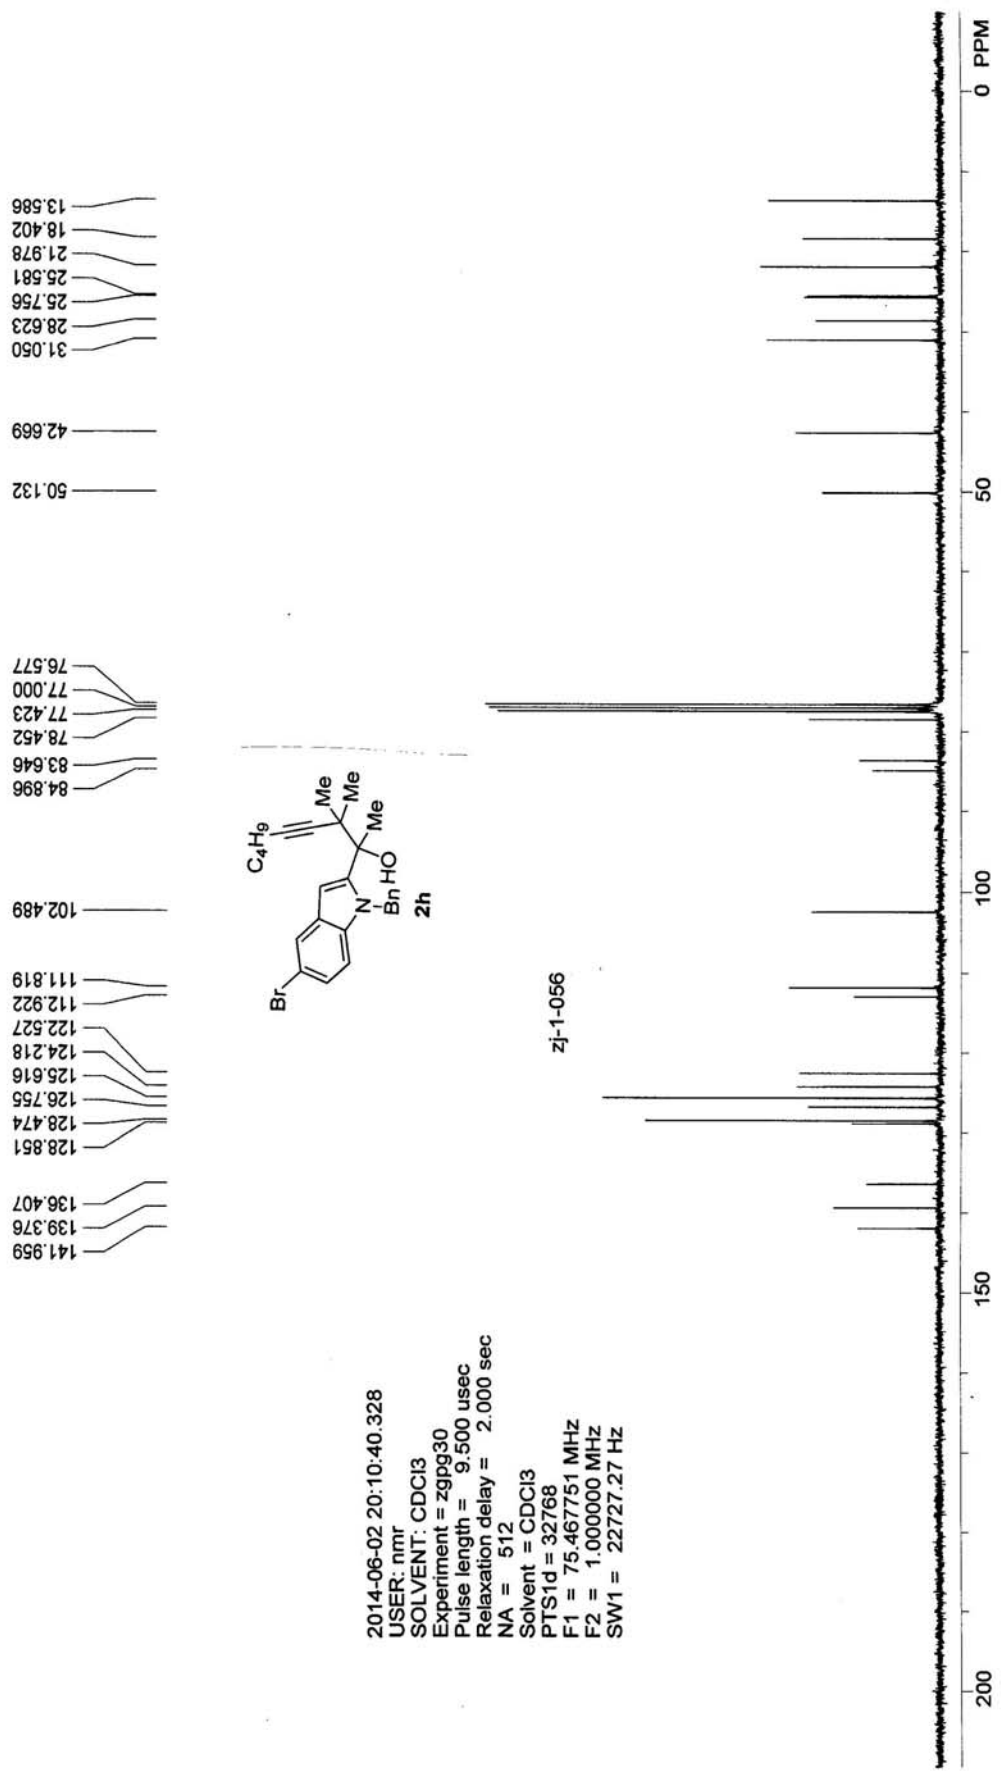

2014-06-02 20:10:40.328  
 USER: nmr  
 SOLVENT: CDCl3  
 Experiment = zgpg30  
 Pulse length = 9.500 usec  
 Relaxation delay = 2.000 sec  
 NA = 512  
 Solvent = CDCl3  
 PTS1d = 32768  
 F1 = 75.467751 MHz  
 F2 = 1.000000 MHz  
 SW1 = 22727.27 Hz

2015-12-03 14:40:21.015  
 USER: nmr  
 SOLVENT: Acetone - d6  
 Experiment = zg30  
 Pulse length = 14.000 usec  
 Relaxation delay = 1.000 sec  
 NA = 8  
 Solvent = Acetone - d6  
 PTS1d = 32768  
 F1 = 300.130005 MHz  
 F2 = 1.000000 MHz  
 SW1 = 6188.12 Hz

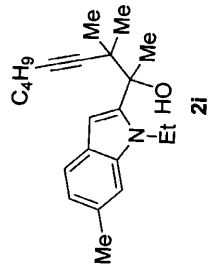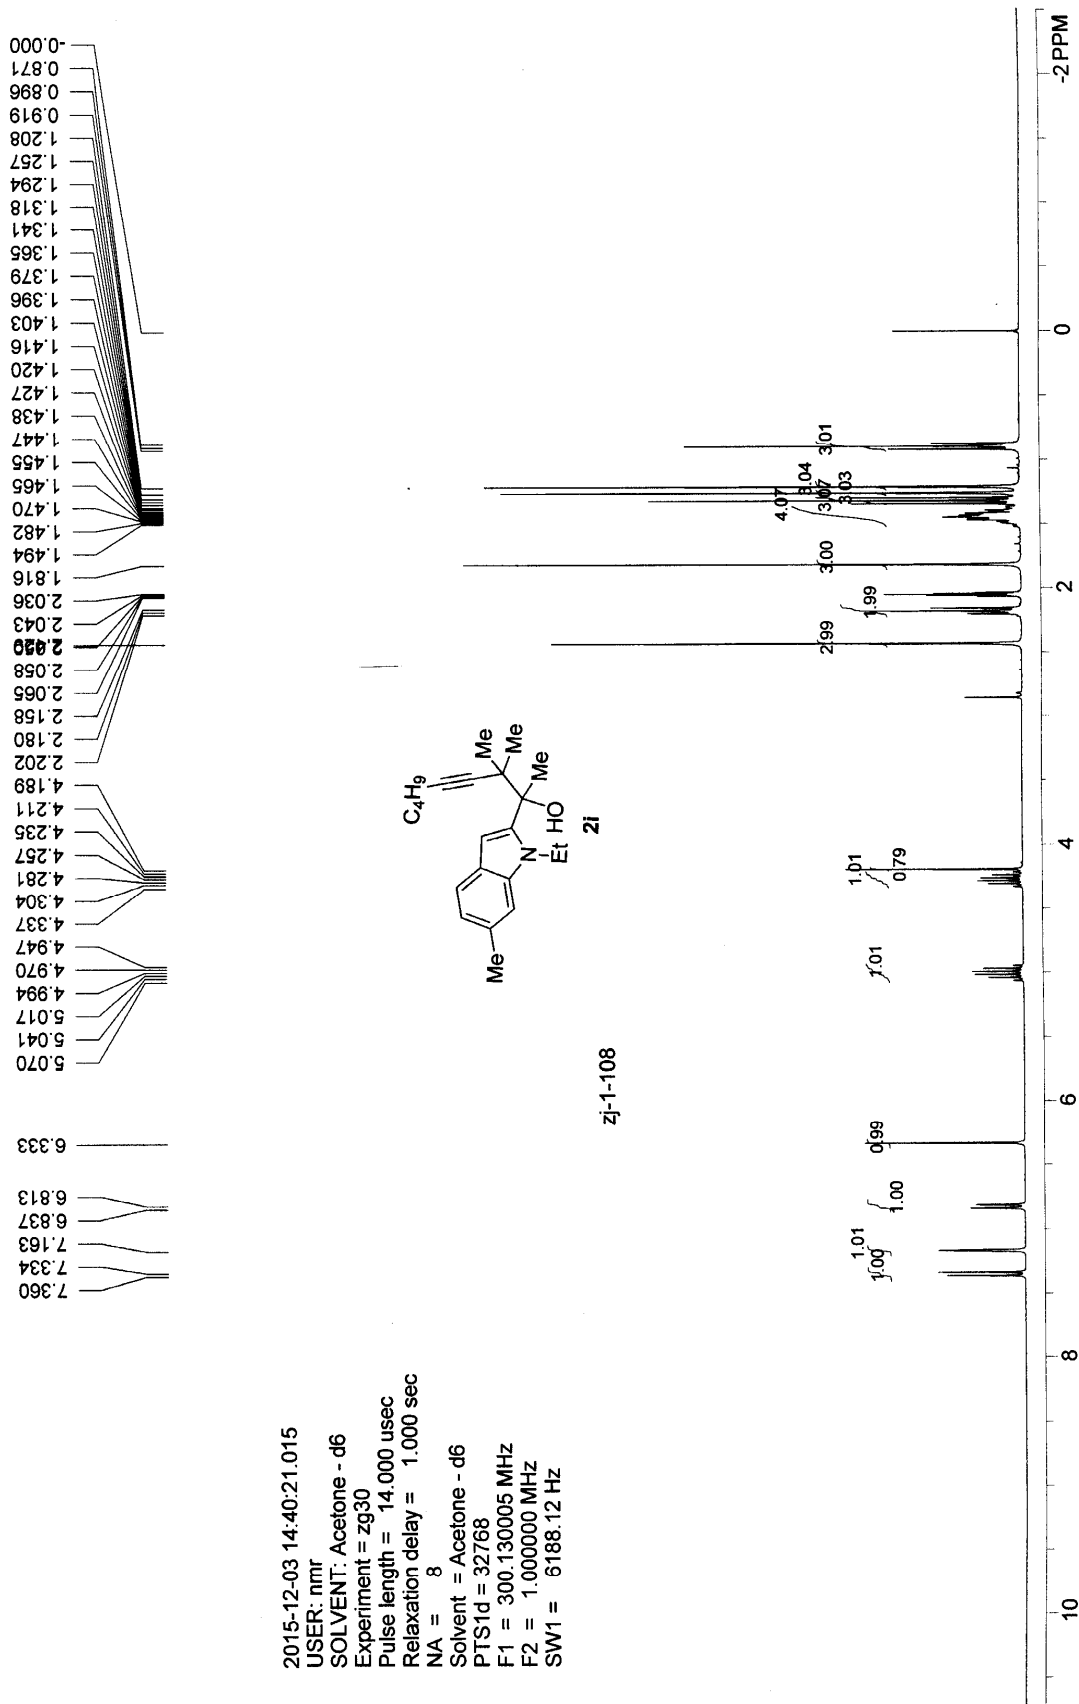

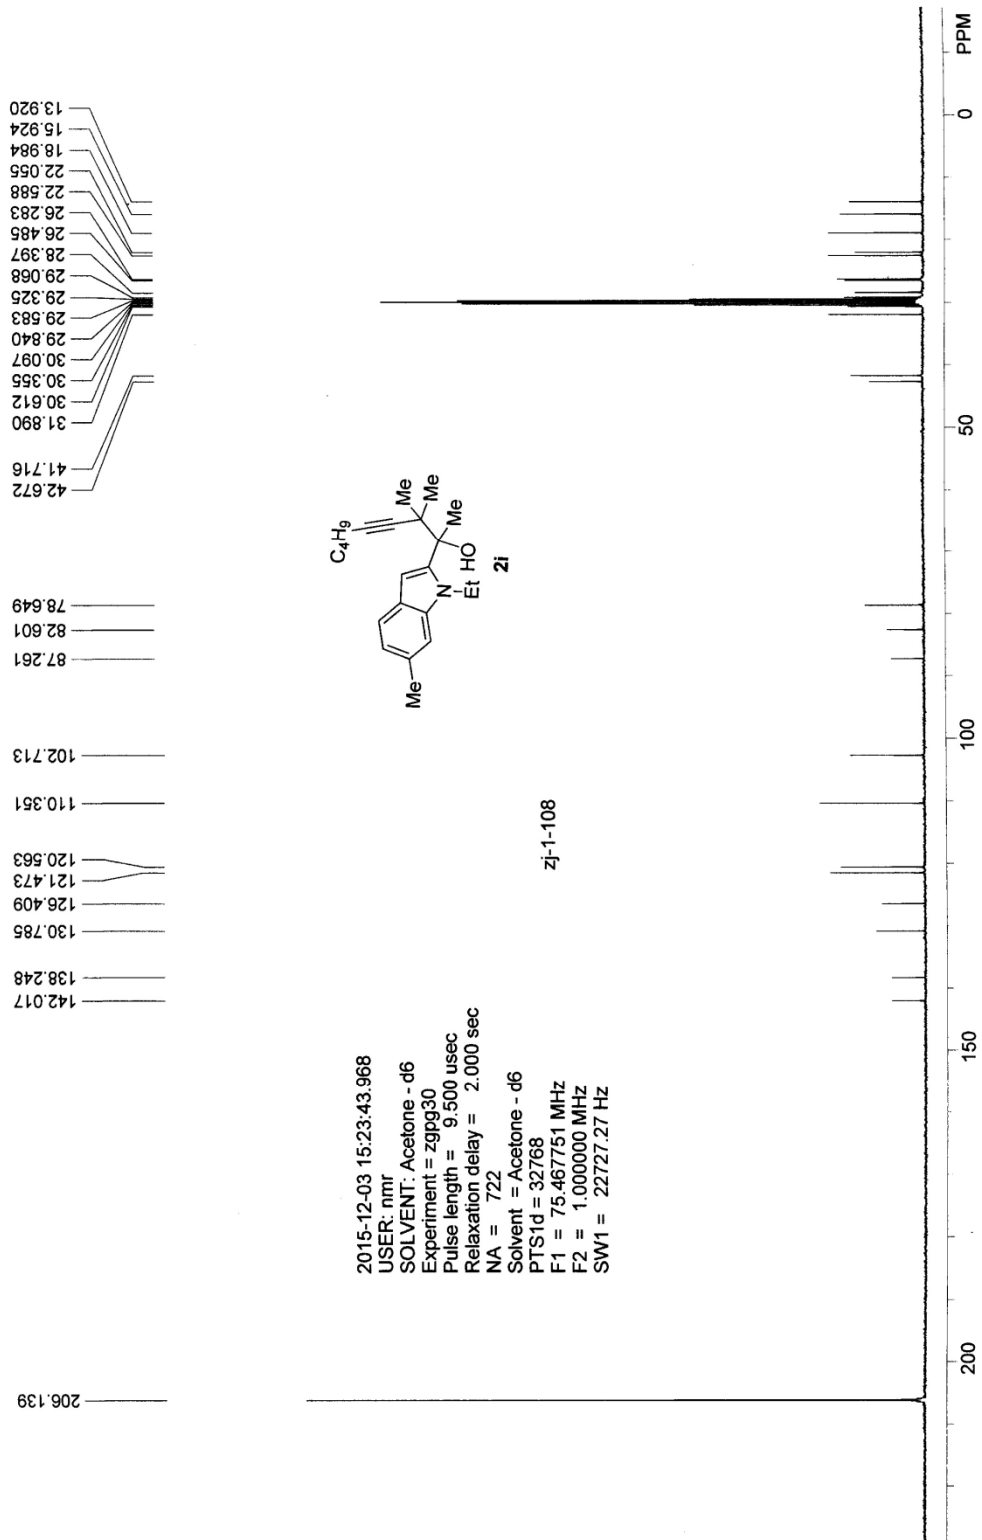

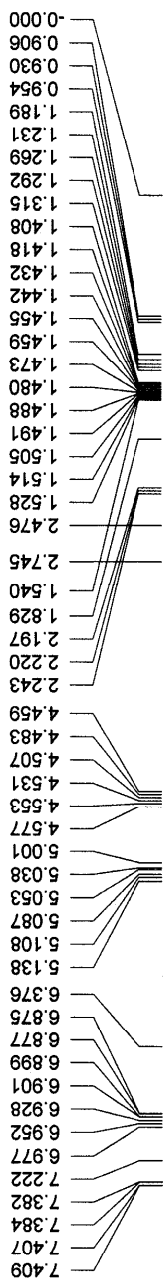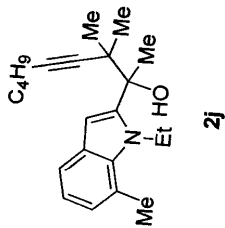

2014-04-26 16:24:47.906  
 USER: nmr  
 SOLVENT: CDCl<sub>3</sub>  
 Experiment = zg30  
 Pulse length = 14.000 usec  
 Relaxation delay = 1.000 sec  
 NA = 8  
 Solvent = CDCl<sub>3</sub>  
 PTS1d = 32768  
 F1 = 300.130005 MHz  
 F2 = 1.000000 MHz  
 SW1 = 6188.12 Hz

zj-1-049

2014-04-26 18:50:57.703  
 USER: nmr  
 SOLVENT: CDCl3  
 Experiment = zgpg30  
 Pulse length = 9.500 usec  
 Relaxation delay = 2.000 sec  
 NA = 1967  
 Solvent = CDCl3  
 PTS1d = 32768  
 F1 = 75.467751 MHz  
 F2 = 1,000000 MHz  
 SW1 = 22727.27 Hz

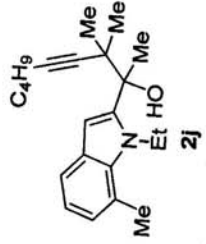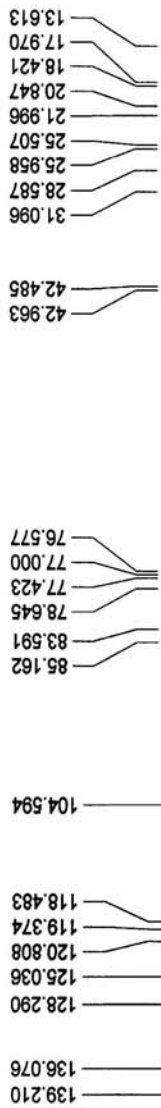

zj-1-049

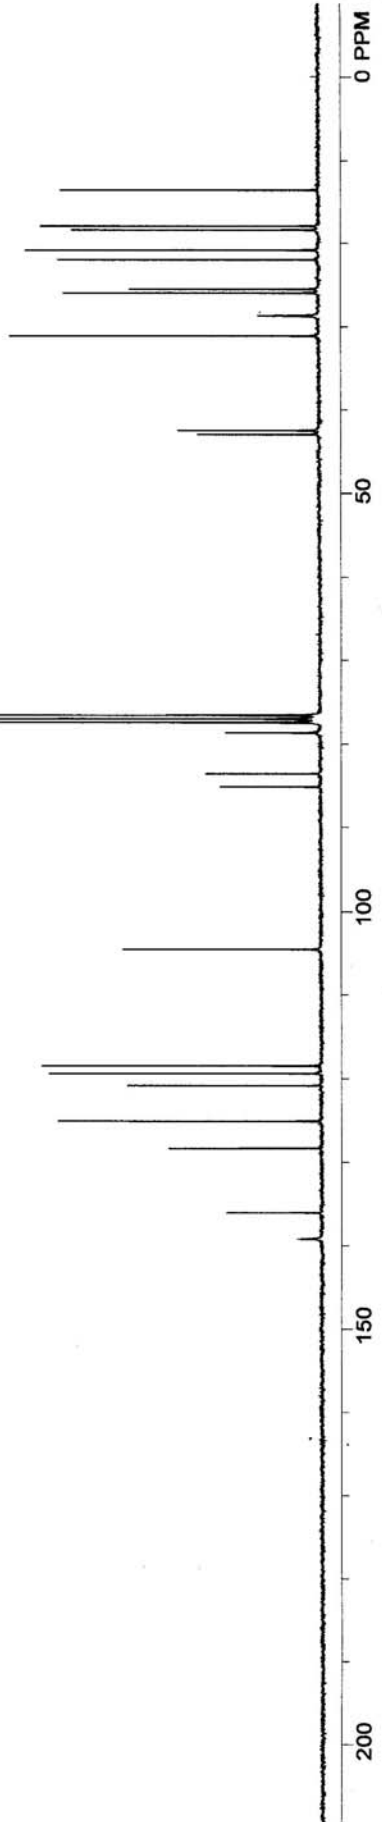

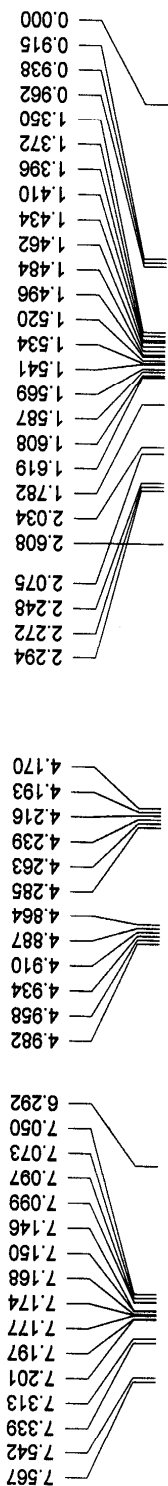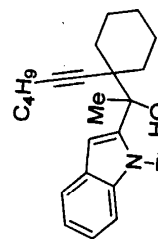

spect, CDCI3,  
 Mon Feb 02 07:03:42 2015  
 USER: nmr  
 SOLVENT:  
 Experiment = zg30  
 Pulse length = 14.000 usec  
 Recycle delay = 1.000 sec  
 NA = 8  
 PTS1d = 32768  
 F1 = 300.131866 MHz  
 F2 = 1.000000 MHz  
 SW1 = 6188.12 Hz

zj-1-173

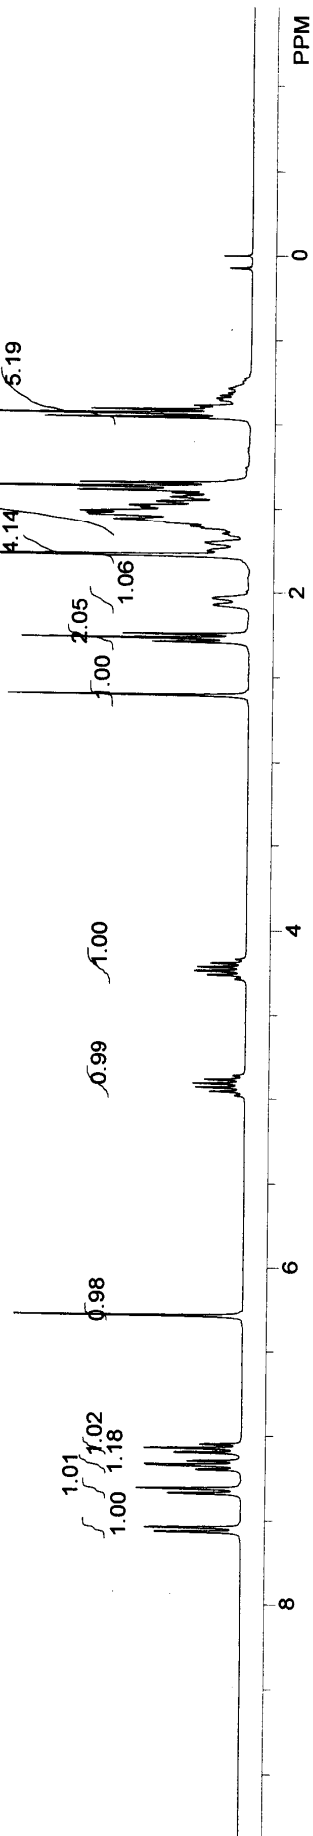

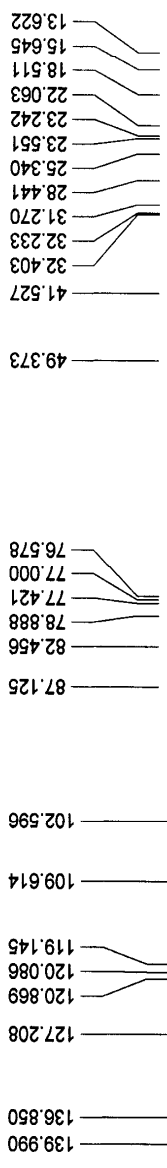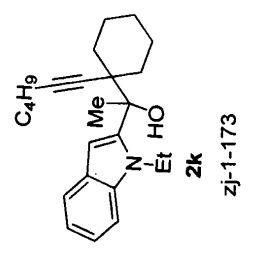

spec: CDCl3  
 Wed Sep 24 02:33:28 2014  
 USER: nmr  
 SOLVENT:   
 Experiment = zgg930  
 Pulse length = 9.500 usec  
 Recycle delay = 2.000 sec  
 NA = 6383  
 PTS1d = 32768  
 F1 = 75.476807 MHz  
 F2 = 1.000000 MHz  
 SW1 = 22727.27 Hz

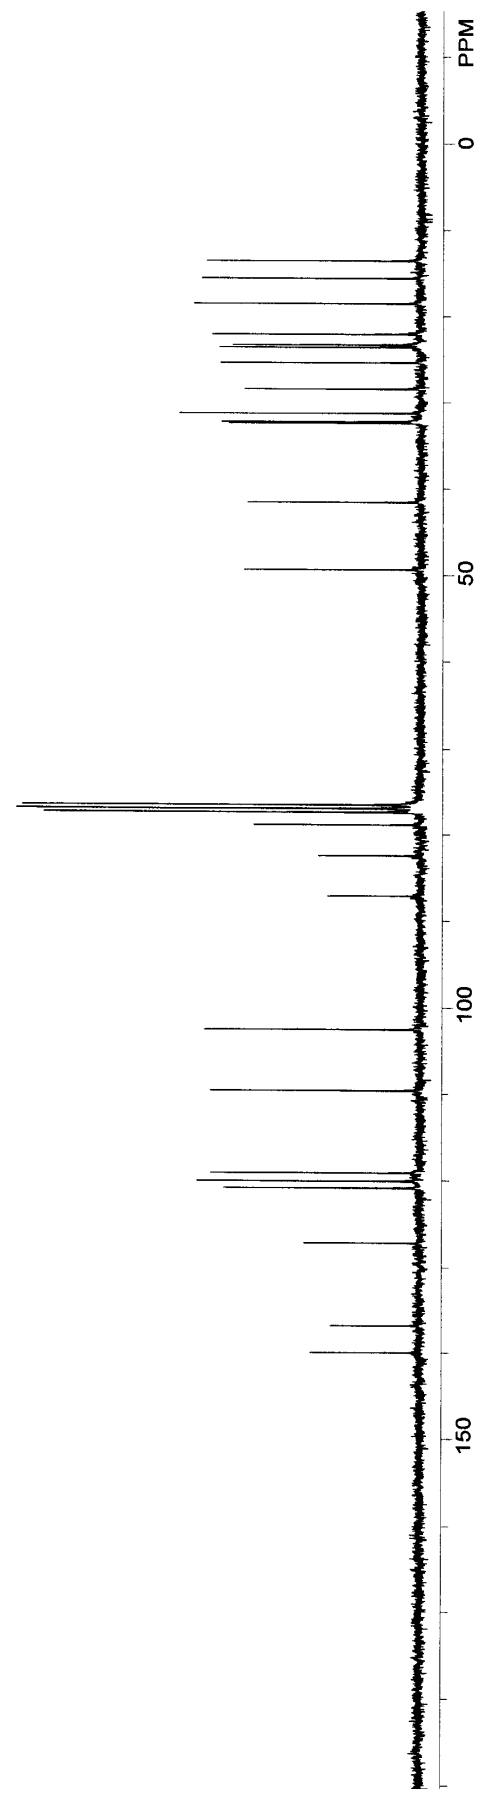

7.551  
7.526  
7.329  
7.303  
7.190  
7.182  
7.167  
7.163  
7.140  
7.136  
7.089  
7.085  
7.063  
7.059  
7.039  
7.036  
6.312  
6.299  
5.025  
5.001  
4.978  
4.955  
4.931  
4.908  
4.320  
4.298  
4.274  
4.251  
4.228  
4.205  
2.539  
2.252  
2.229  
2.206  
2.012  
1.935  
1.954  
1.972  
1.992  
1.922  
1.972  
1.657  
1.632  
1.608  
1.564  
1.542  
1.529  
1.515  
1.505  
1.491  
1.457  
1.438  
1.409  
1.390  
1.367  
1.343  
1.178  
1.101  
0.964  
0.950  
0.939  
0.926  
0.914  
0.902  
0.872  
-0.000

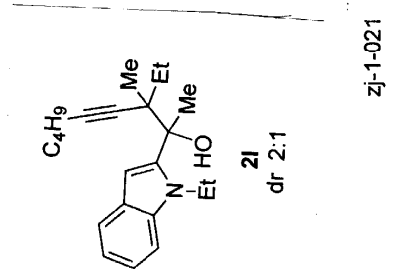

2014-03-28 21:18:10.890  
 USER: nmr  
 SOLVENT: CDCl3  
 Experiment = zg30  
 Pulse length = 14.000 usec  
 Relaxation delay = 1.000 sec  
 NA = 8  
 Solvent = CDCl3  
 PTS1d = 32768  
 F1 = 300.130005 MHz  
 F2 = 1.000000 MHz  
 SW1 = 6188.12 Hz

zj-1-021

6.30

1.00  
1.00  
1.05  
0.65  
0.33

1.00  
1.00

2.00  
1.96  
1.00  
0.72  
0.35

1.04  
1.99

10 8 6 4 2 0 -2 -4 PPM



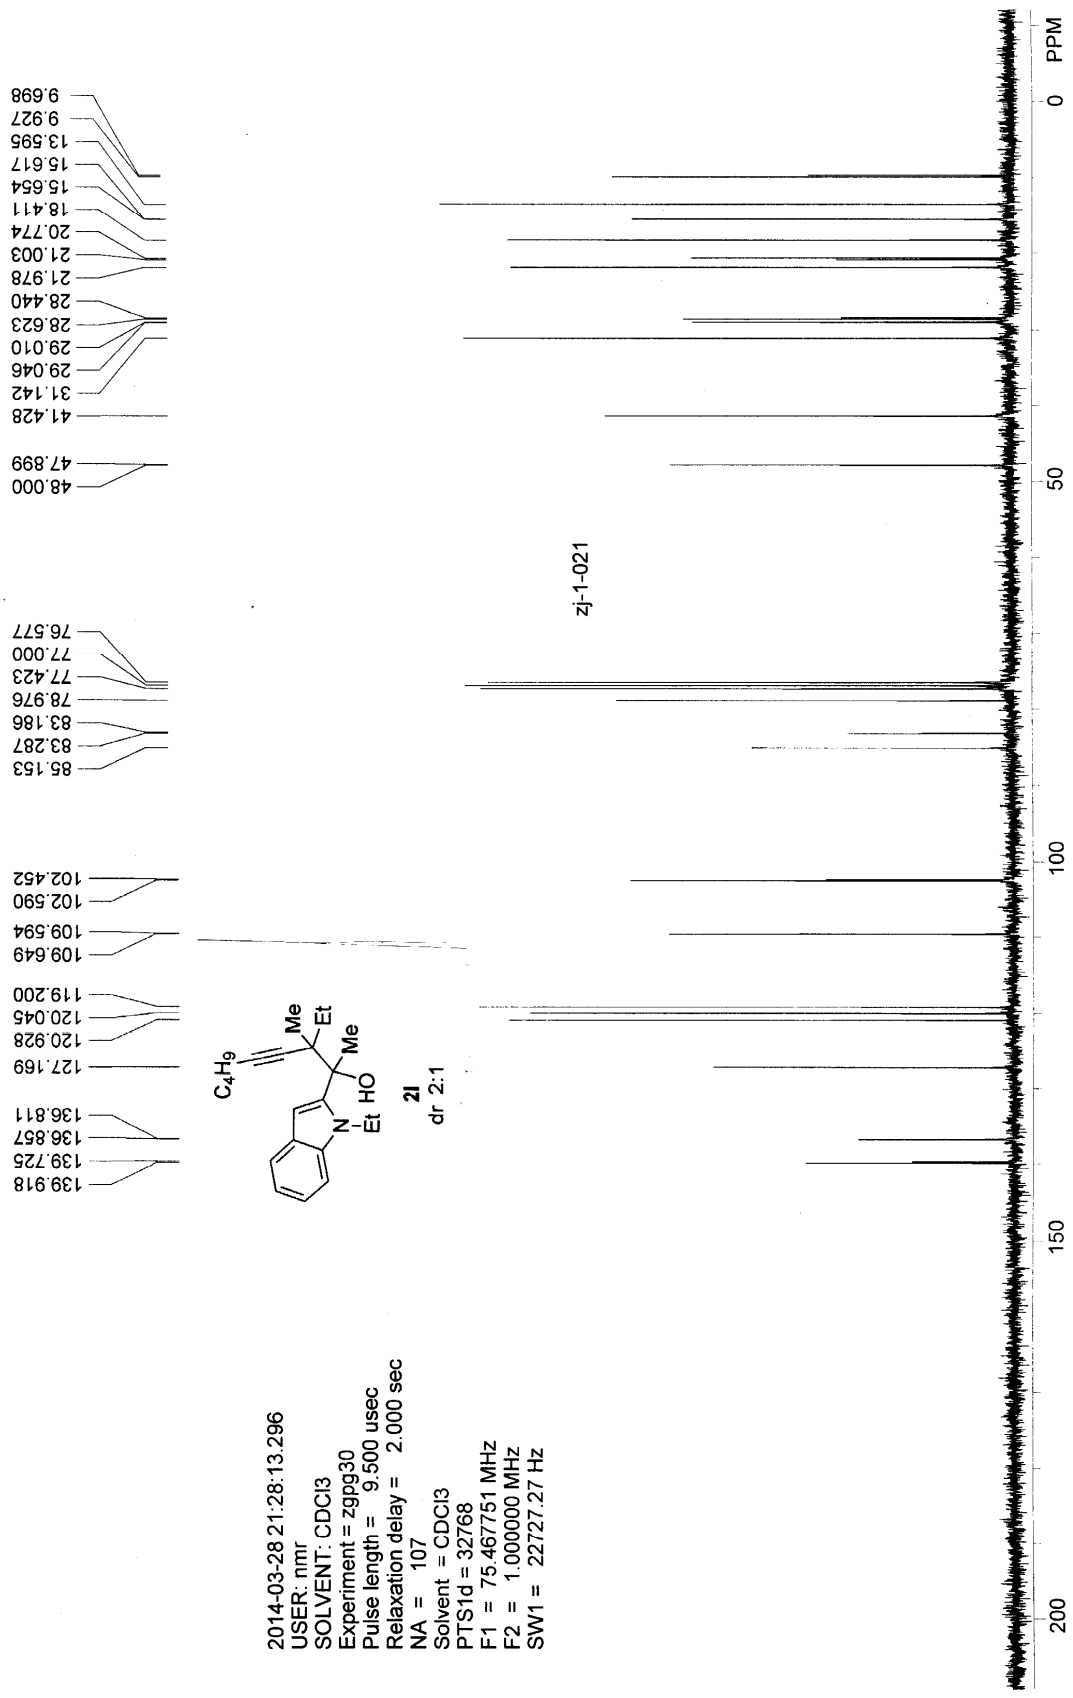

2014-03-28 21:28:13.296  
 USER: nmr  
 SOLVENT: CDCl3  
 Experiment = z9p930  
 Pulse length = 9.500 usec  
 Relaxation delay = 2.000 sec  
 NA = 107  
 Solvent = CDCl3  
 PTS1d = 32768  
 F1 = 75.467751 MHz  
 F2 = 1.000000 MHz  
 SW1 = 22727.27 Hz

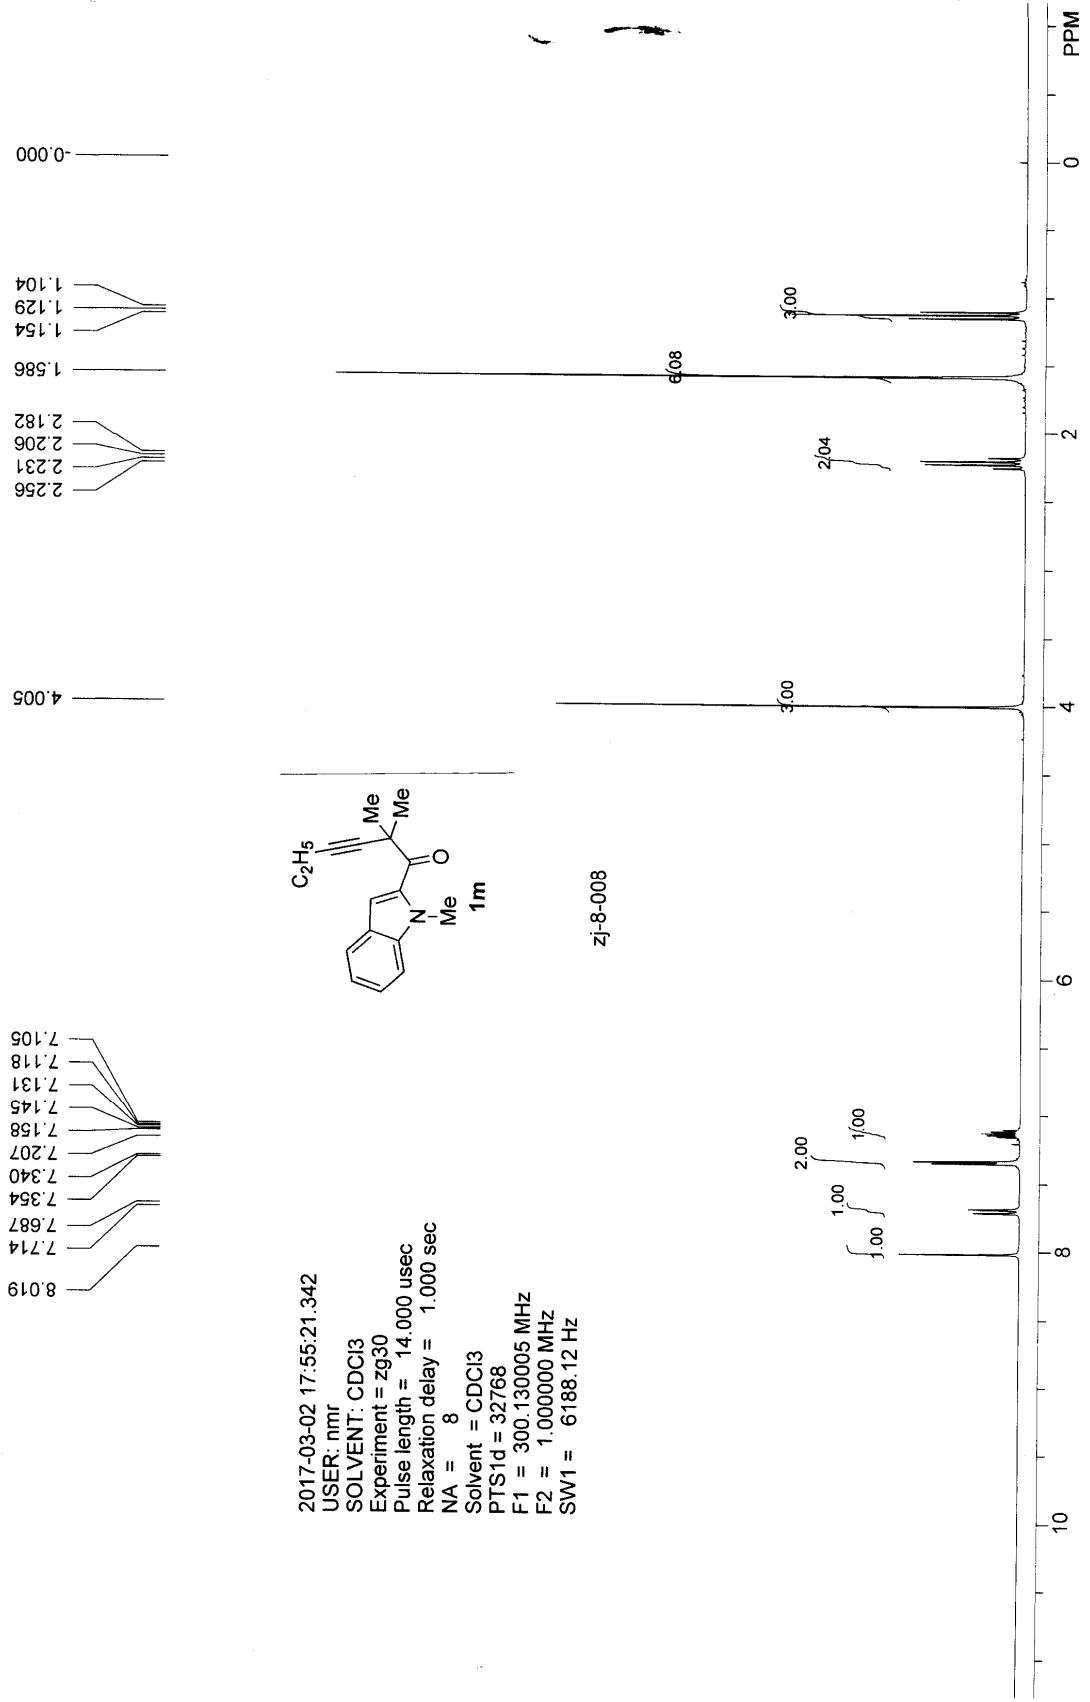

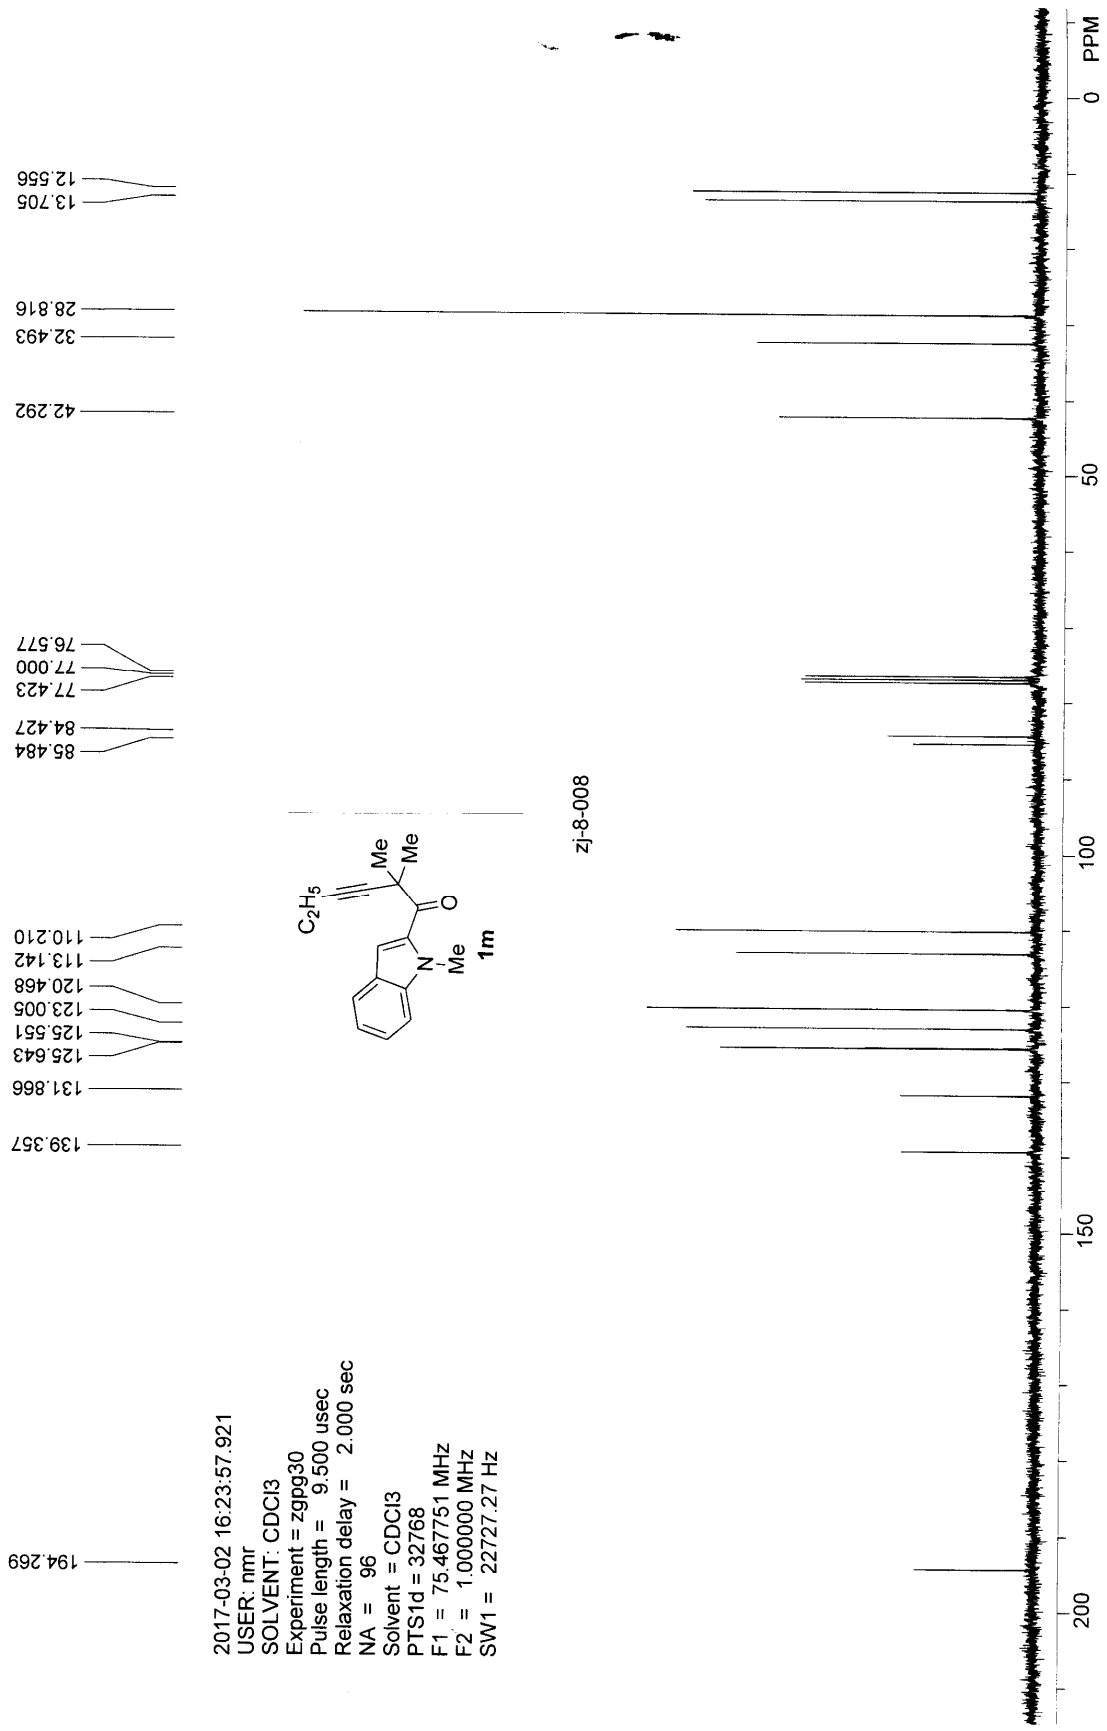

2017-03-02 16:23:57.921  
 USER: nmr  
 SOLVENT: CDCl3  
 Experiment = zgpg30  
 Pulse length = 9.500 usec  
 Relaxation delay = 2.000 sec  
 NA = 96  
 Solvent = CDCl3  
 PTS1d = 32768  
 F1 = 75.467751 MHz  
 F2 = 1.000000 MHz  
 SW1 = 22727.27 Hz

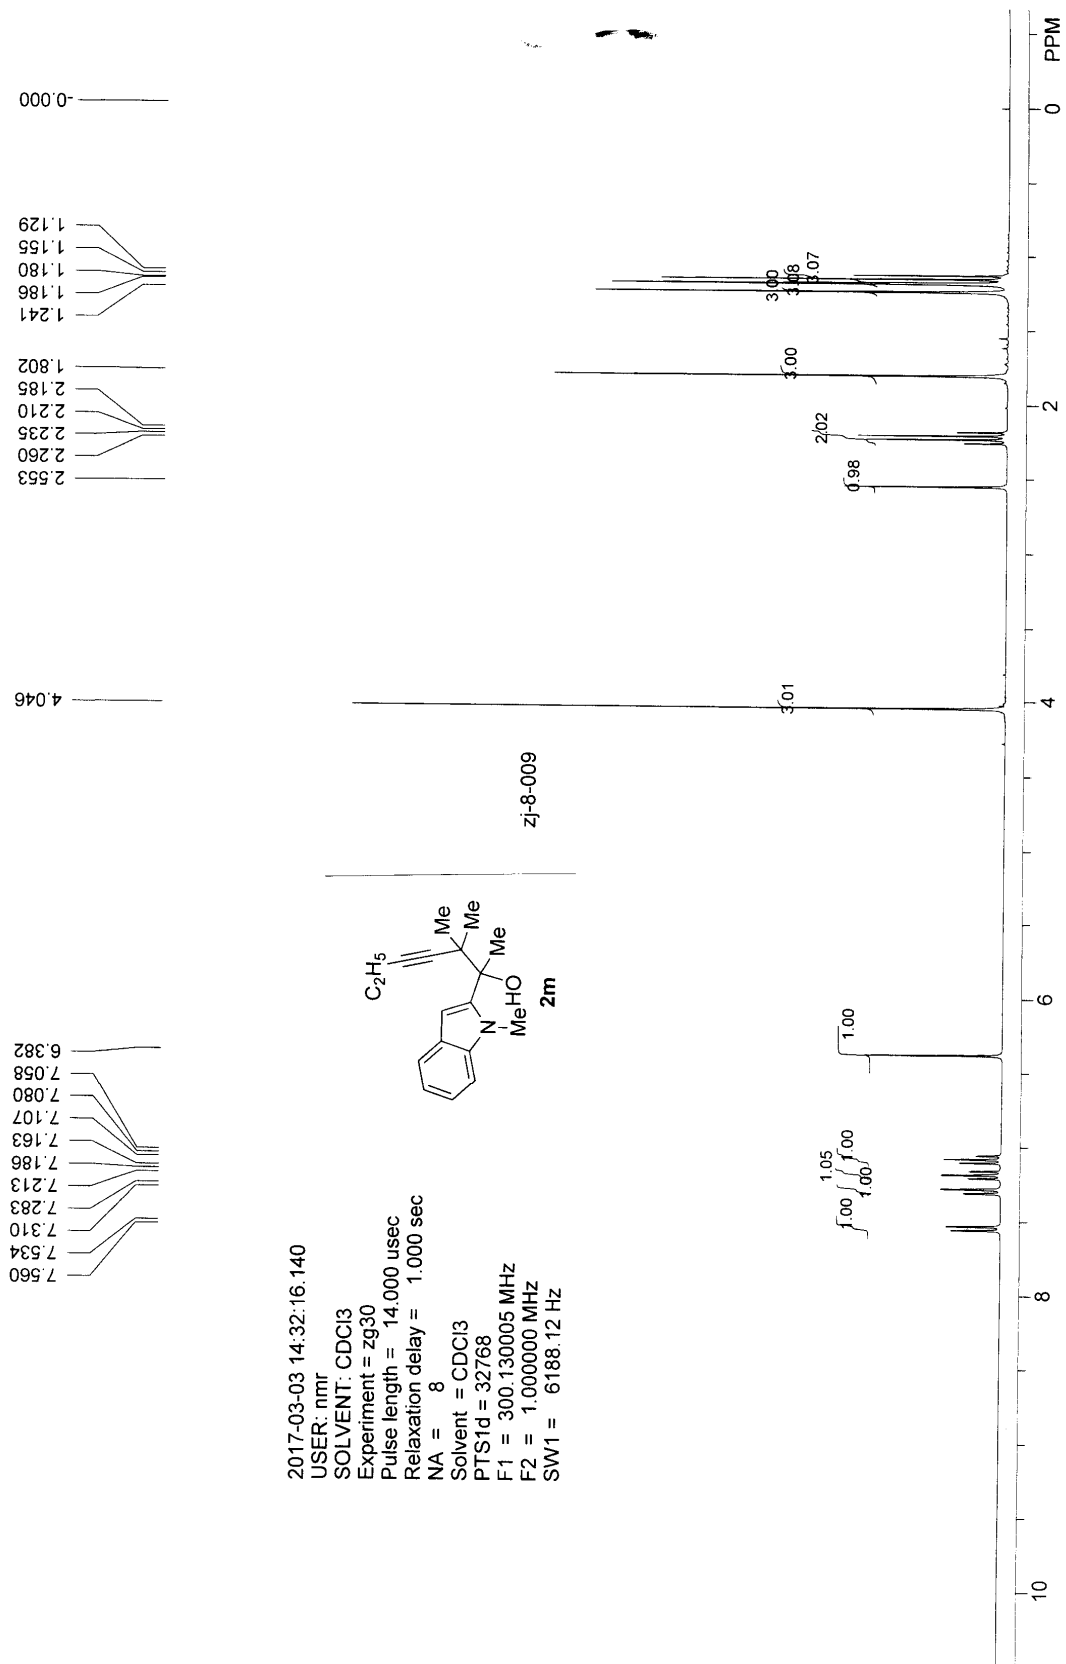

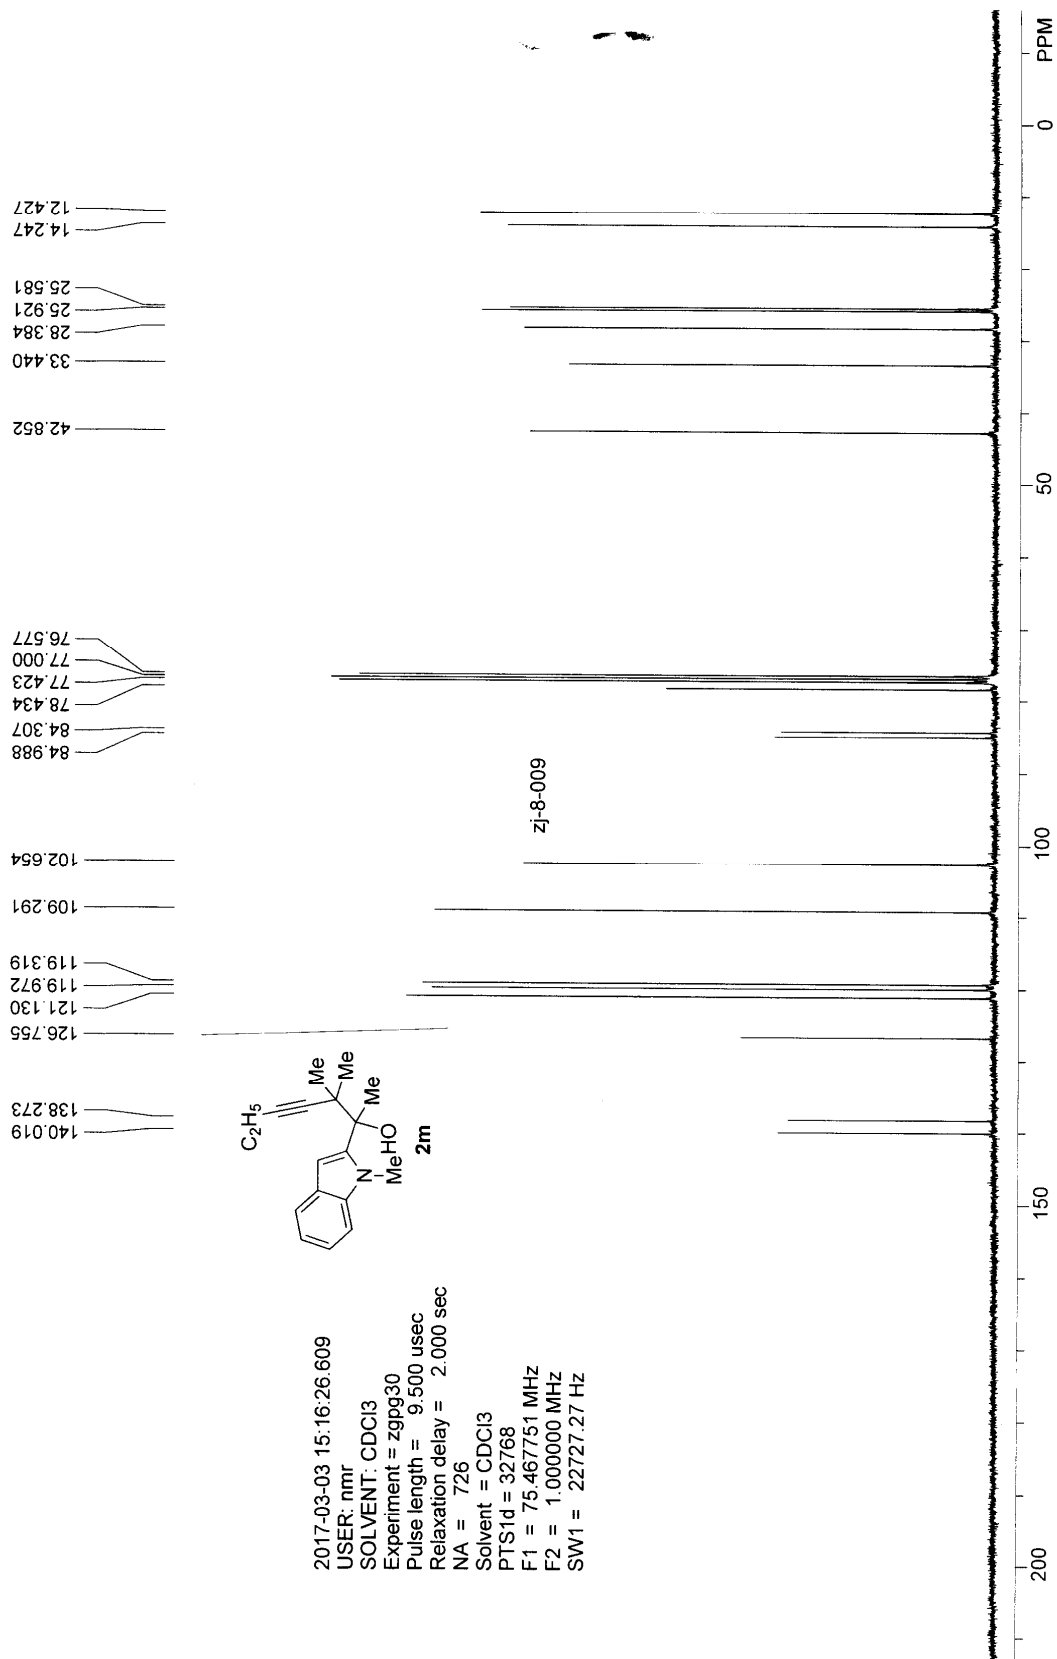

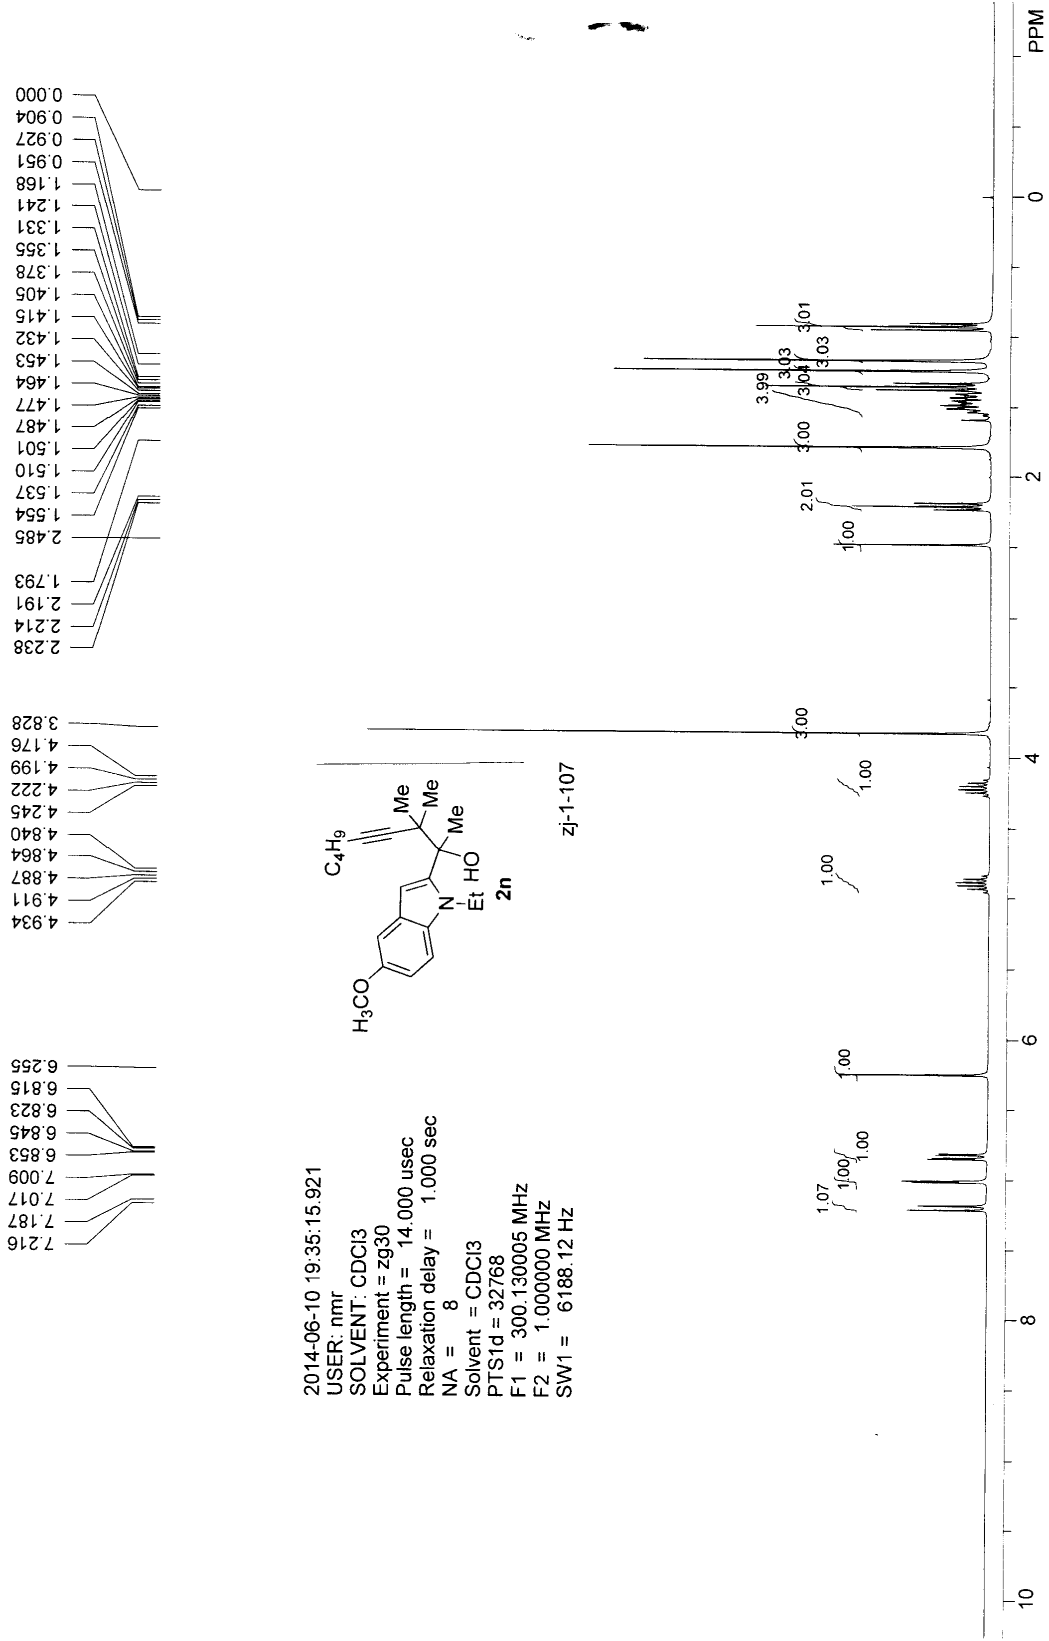

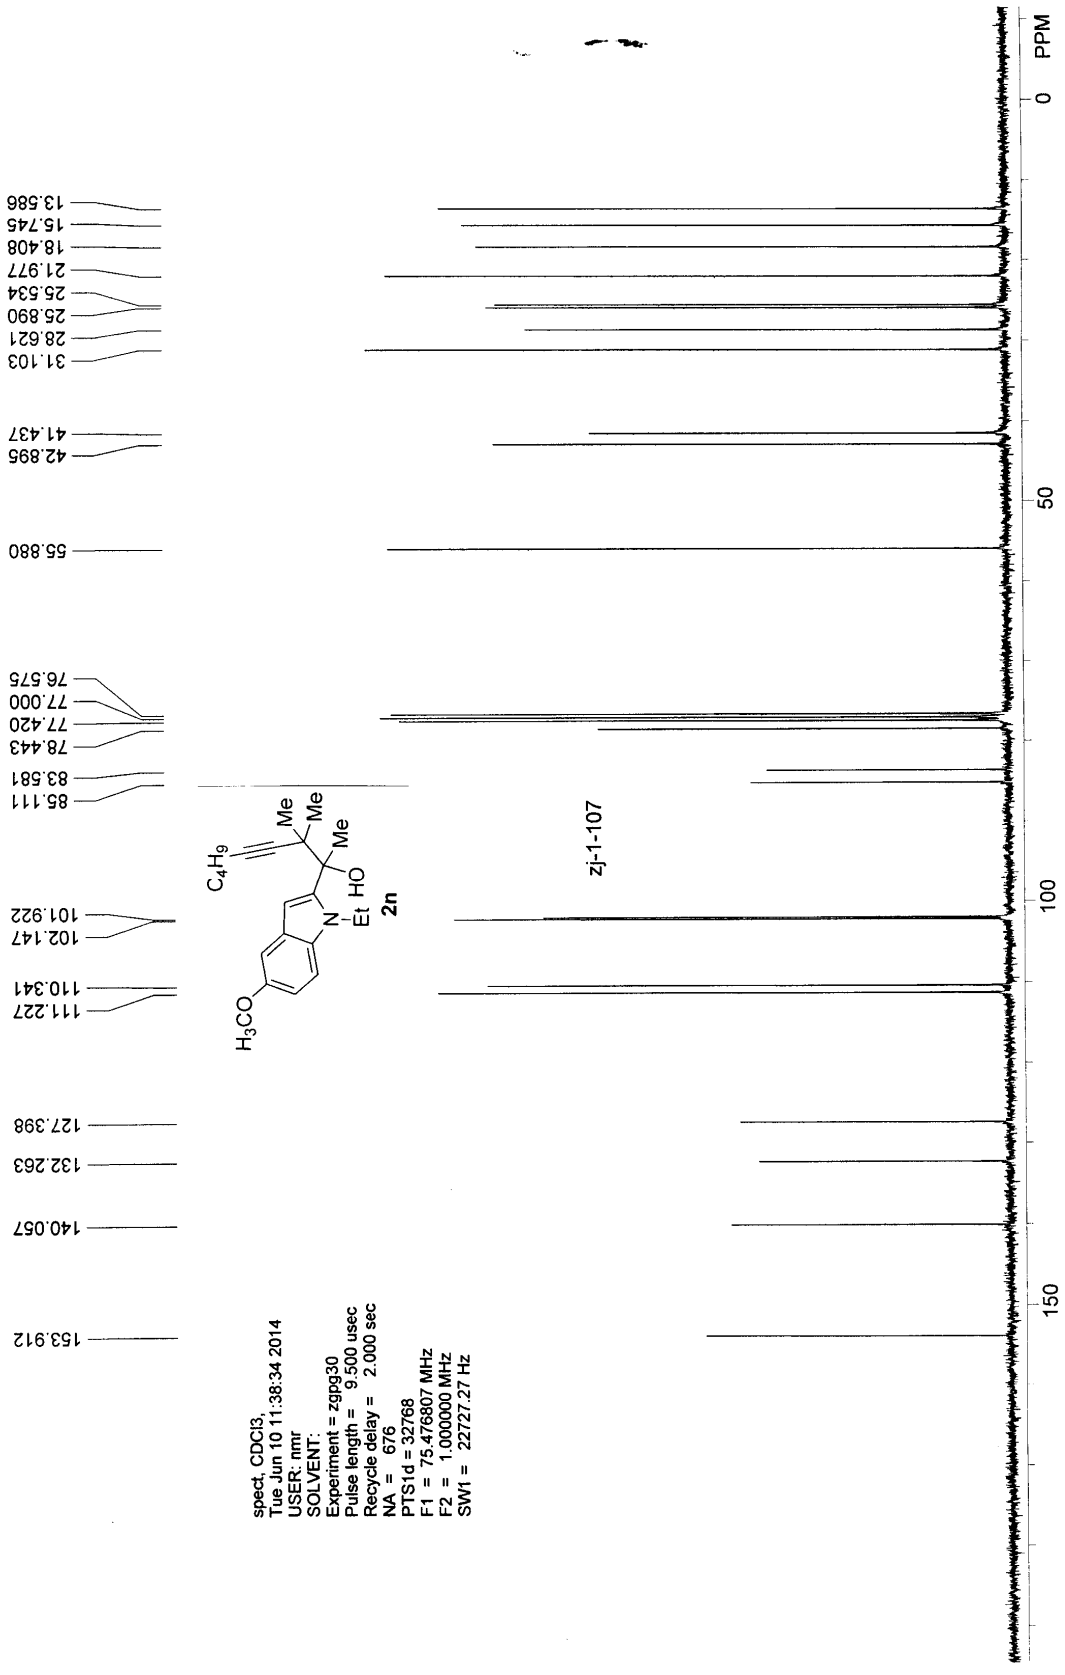

spect. CDCl<sub>3</sub>,  
 Tue, Jun 10 11:38:34 2014  
 USER: nmr  
 SOLVENT:  
 Experiment = zgpg30  
 Pulse length = 9.500 usec  
 Recycle delay = 2.000 sec  
 NA = 676  
 P1S1d = 32768  
 F1 = 75.476807 MHz  
 F2 = 1.000000 MHz  
 SW1 = 22727.27 Hz

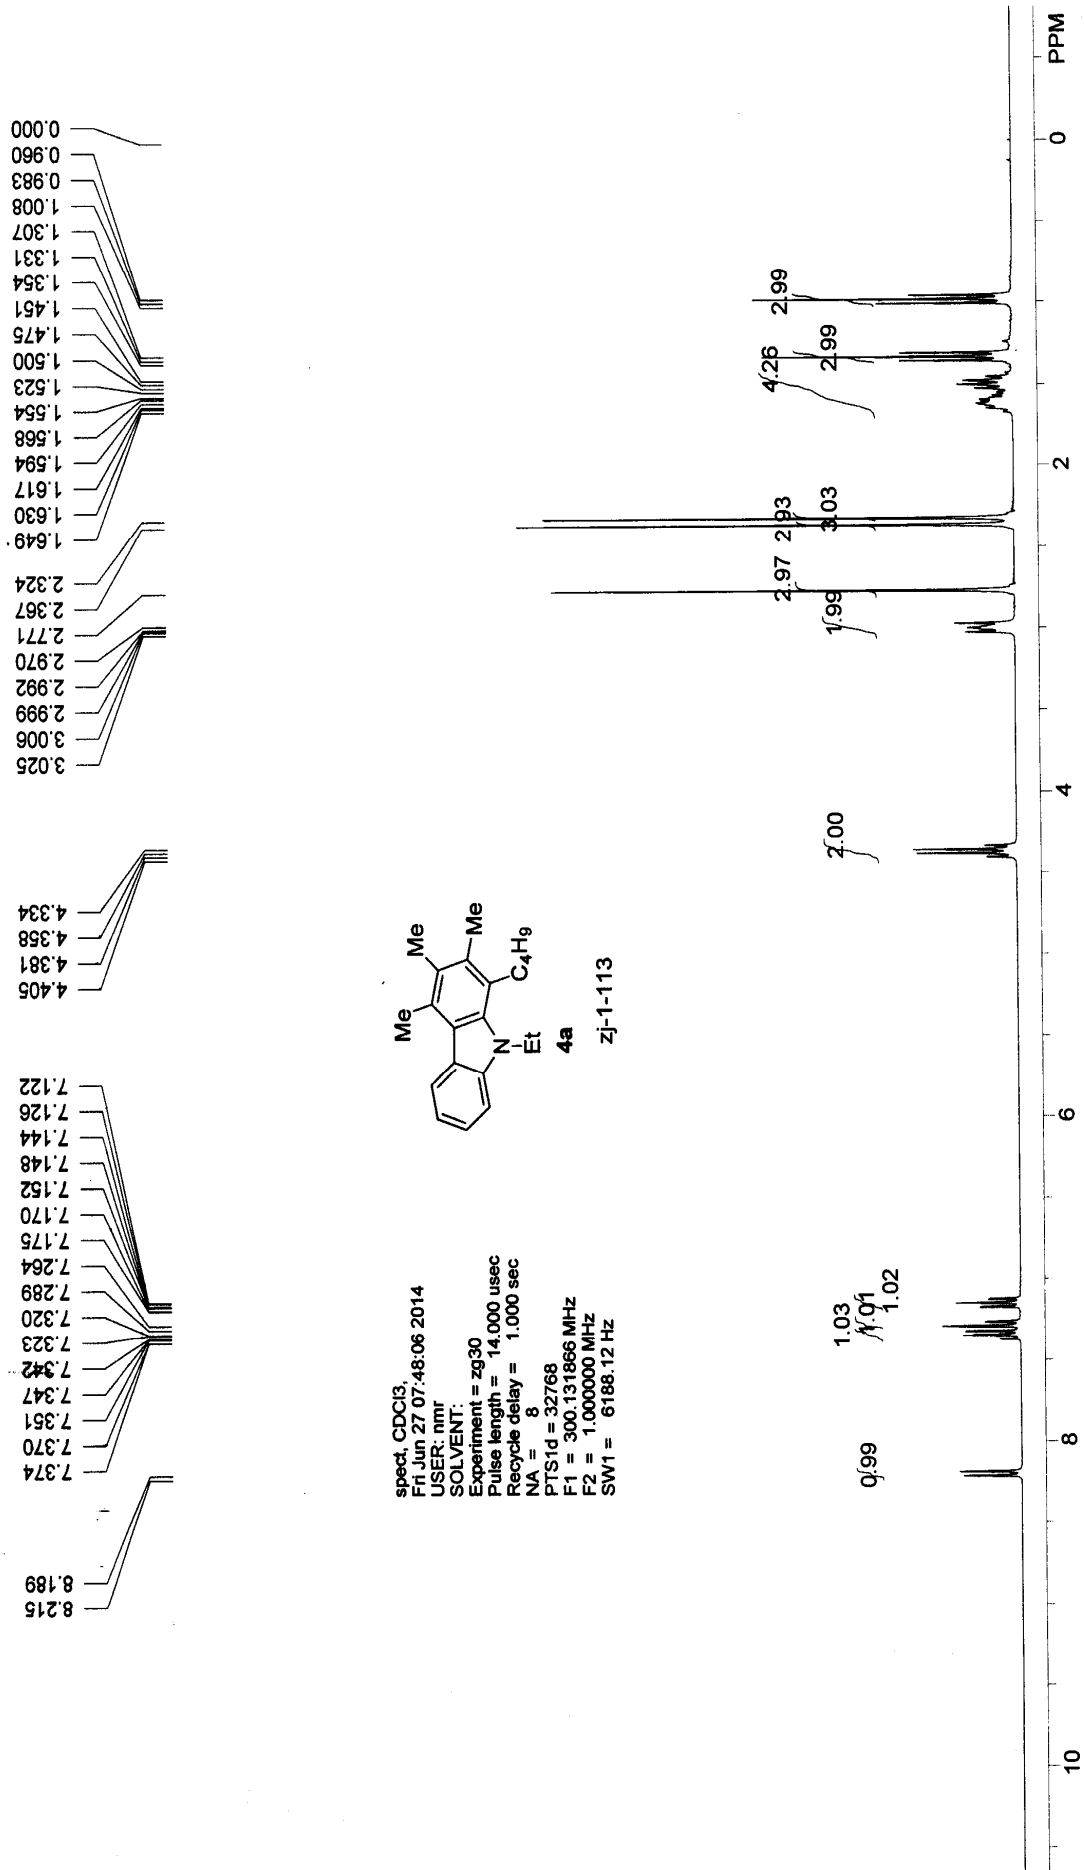



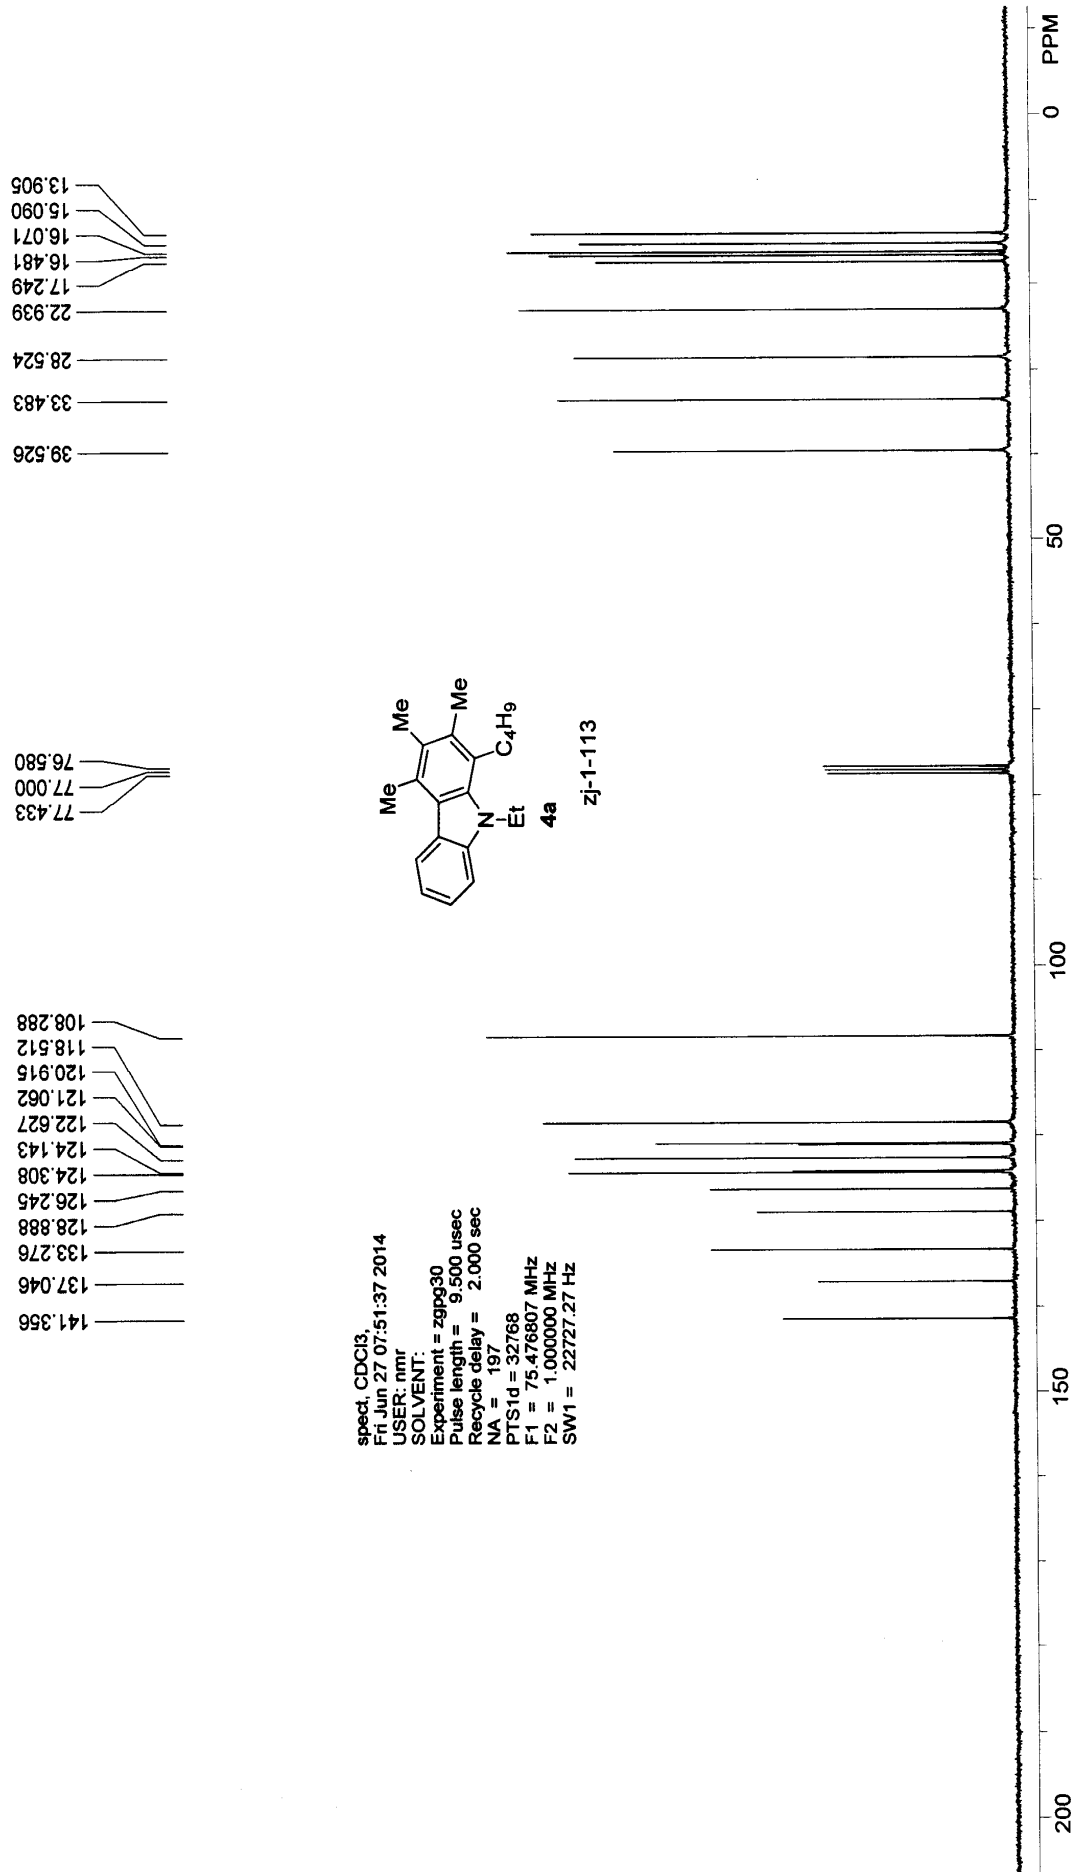

spect. CDCl3,  
 Fri Jun 27 07:51:37 2014  
 USER: nmr  
 SOLVENT:  
 Experiment = zgpg30  
 Pulse length = 9.500 usec  
 Recycle delay = 2.000 sec  
 NA = 197  
 PTS1d = 32768  
 F1 = 75.476807 MHz  
 F2 = 1.000000 MHz  
 SW1 = 22727.27 Hz

13.905  
 15.090  
 16.071  
 16.481  
 17.249  
 22.939  
 28.524  
 33.483  
 39.526

76.580  
 77.000  
 77.433

108.288  
 118.512  
 120.915  
 121.062  
 122.627  
 124.143  
 124.308  
 126.245  
 128.888  
 133.276  
 137.046  
 141.356

3.931  
3.075  
3.048  
3.019  
2.785  
2.364  
2.344  
1.658  
1.648  
1.629  
1.614  
1.603  
1.593  
1.578  
1.560  
1.535  
1.512  
1.487  
1.464  
1.439  
1.016  
0.992  
0.968  
0.000

8.209  
8.183  
7.406  
7.403  
7.378  
7.355  
7.352  
7.301  
7.273  
7.185  
7.182  
7.158  
7.135  
7.132

spect, CDCl3,  
Thu Jul 10 01:52:16 2014  
USER: nmr  
SOLVENT:  
Experiment = zg30  
Pulse length = 14.000 usec  
Recycle delay = 1.000 sec  
NA = 8  
PTS1d = 32768  
F1 = 300.131866 MHz  
F2 = 1.000000 MHz  
SW1 = 6188.12 Hz

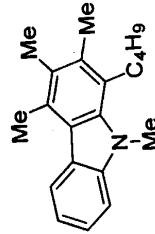

zj-1-141-2

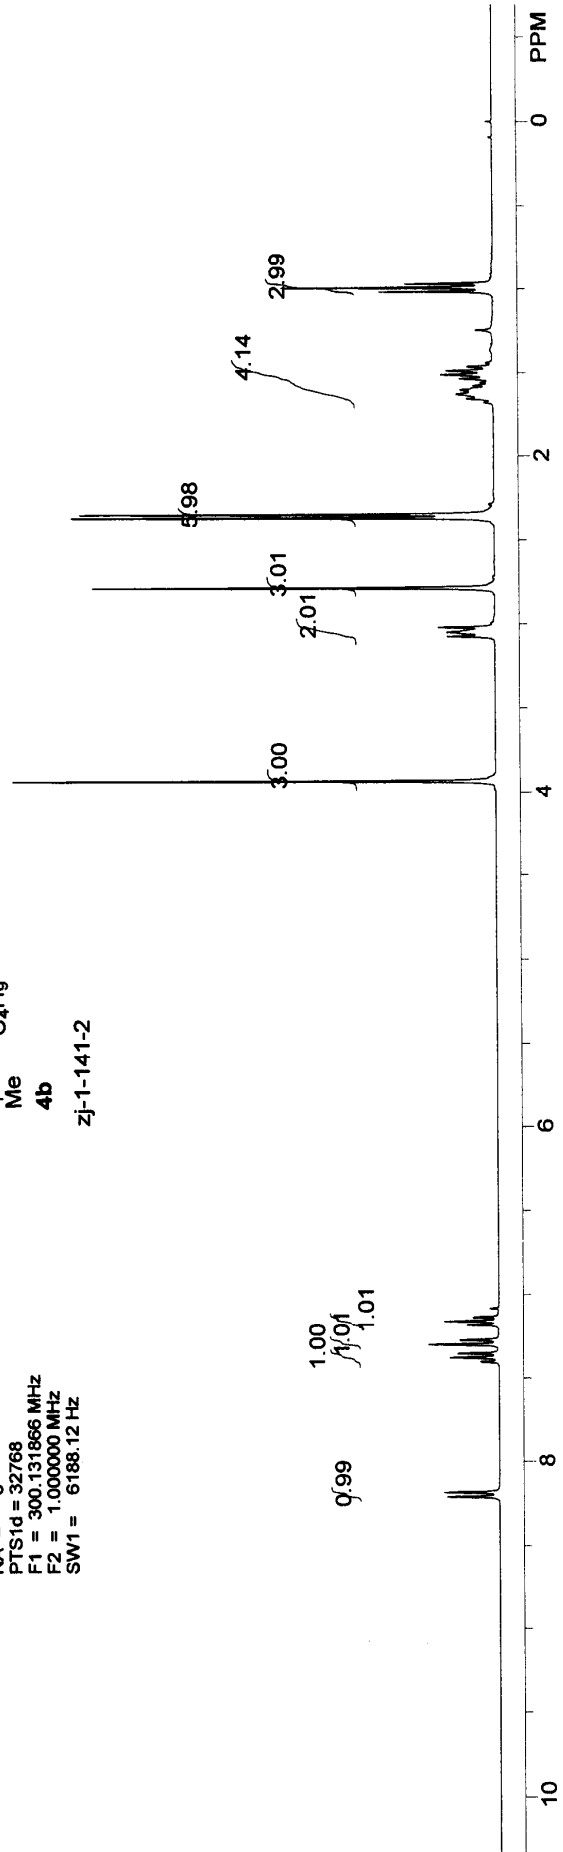

13.948  
16.064  
16.436  
17.227  
23.026  
28.514  
32.889  
34.039

76.575  
77.000  
77.425

108.273  
118.448  
120.860  
121.314  
122.494  
123.833  
124.266  
126.364  
128.761  
133.370  
138.369  
142.489

specd, CDCI3,  
Thu Jul 10 01:55:18 2014  
USER: nmr  
SOLVENT:  
Experiment = zgpg30  
Pulse length = 9.500 usec  
Recycle delay = 2.000 sec  
NA = 165  
PTStd = 32768  
F1 = 75.476807 MHz  
F2 = 1.000000 MHz  
SW1 = 22727.27 Hz

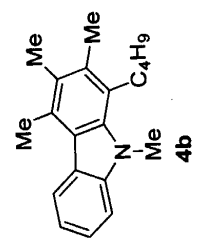

zj-1-141-2

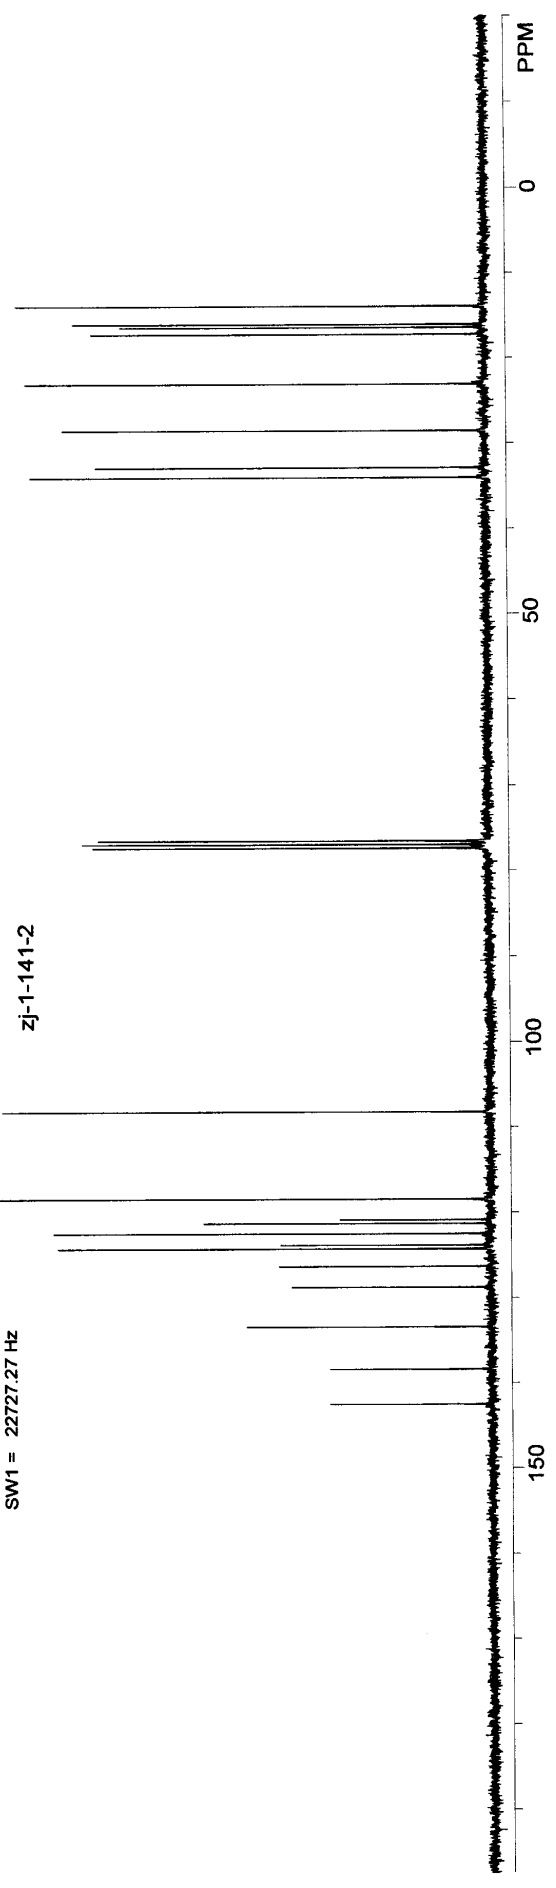

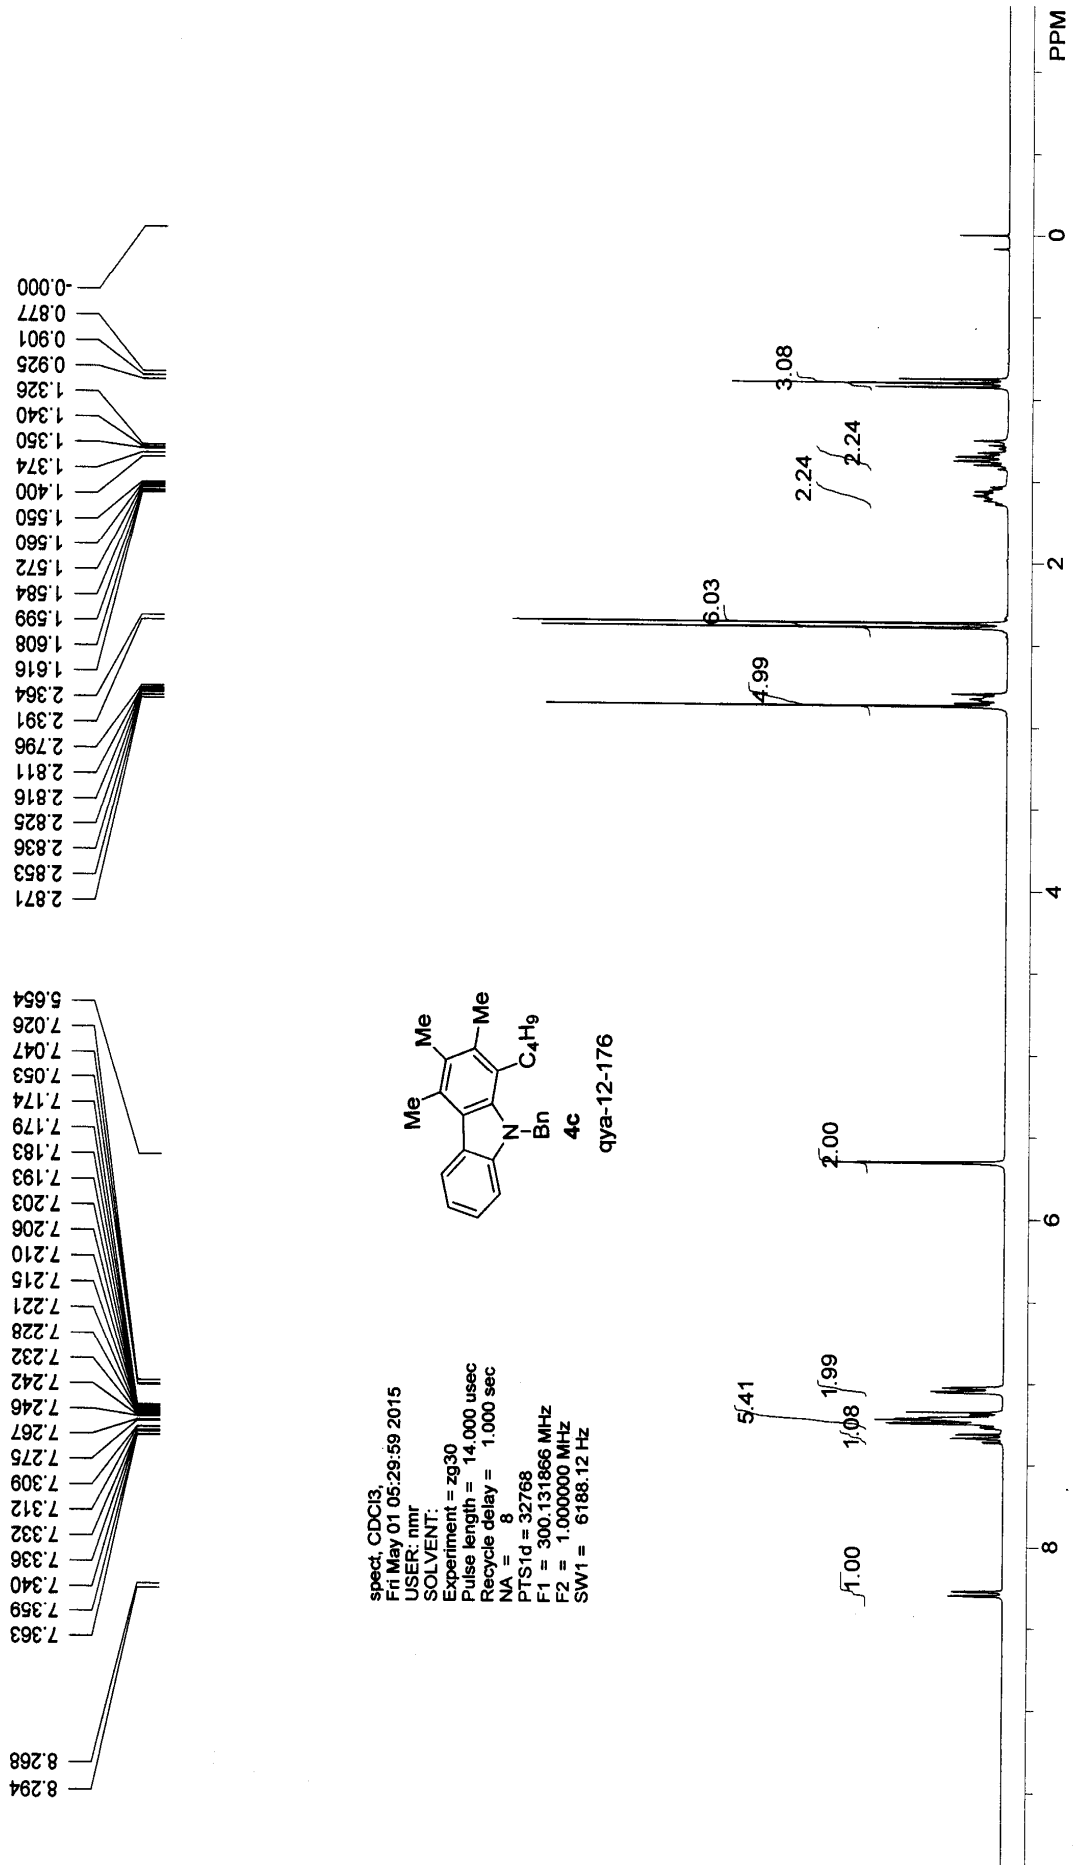

2.871  
2.853  
2.836  
2.825  
2.816  
2.811  
2.796  
2.391  
2.364  
1.616  
1.608  
1.599  
1.584  
1.572  
1.560  
1.550  
1.400  
1.374  
1.350  
1.340  
1.326  
0.925  
0.901  
0.877  
-0.000

8.294  
8.268  
7.363  
7.359  
7.340  
7.336  
7.332  
7.312  
7.309  
7.275  
7.267  
7.246  
7.242  
7.232  
7.228  
7.221  
7.215  
7.210  
7.206  
7.203  
7.193  
7.183  
7.179  
7.174  
7.053  
7.047  
7.026  
5.654

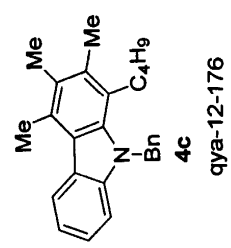

spect, CDCl3,  
 Fri May 01 05:29:59 2015  
 USER: nmr  
 SOLVENT:  
 Experiment = zg30  
 Pulse length = 14,000 usec  
 Recycle delay = 1,000 sec  
 NA = 8  
 P1 = 32768  
 F1 = 300.131866 MHz  
 F2 = 1,000,000 MHz  
 SW1 = 6188.12 Hz

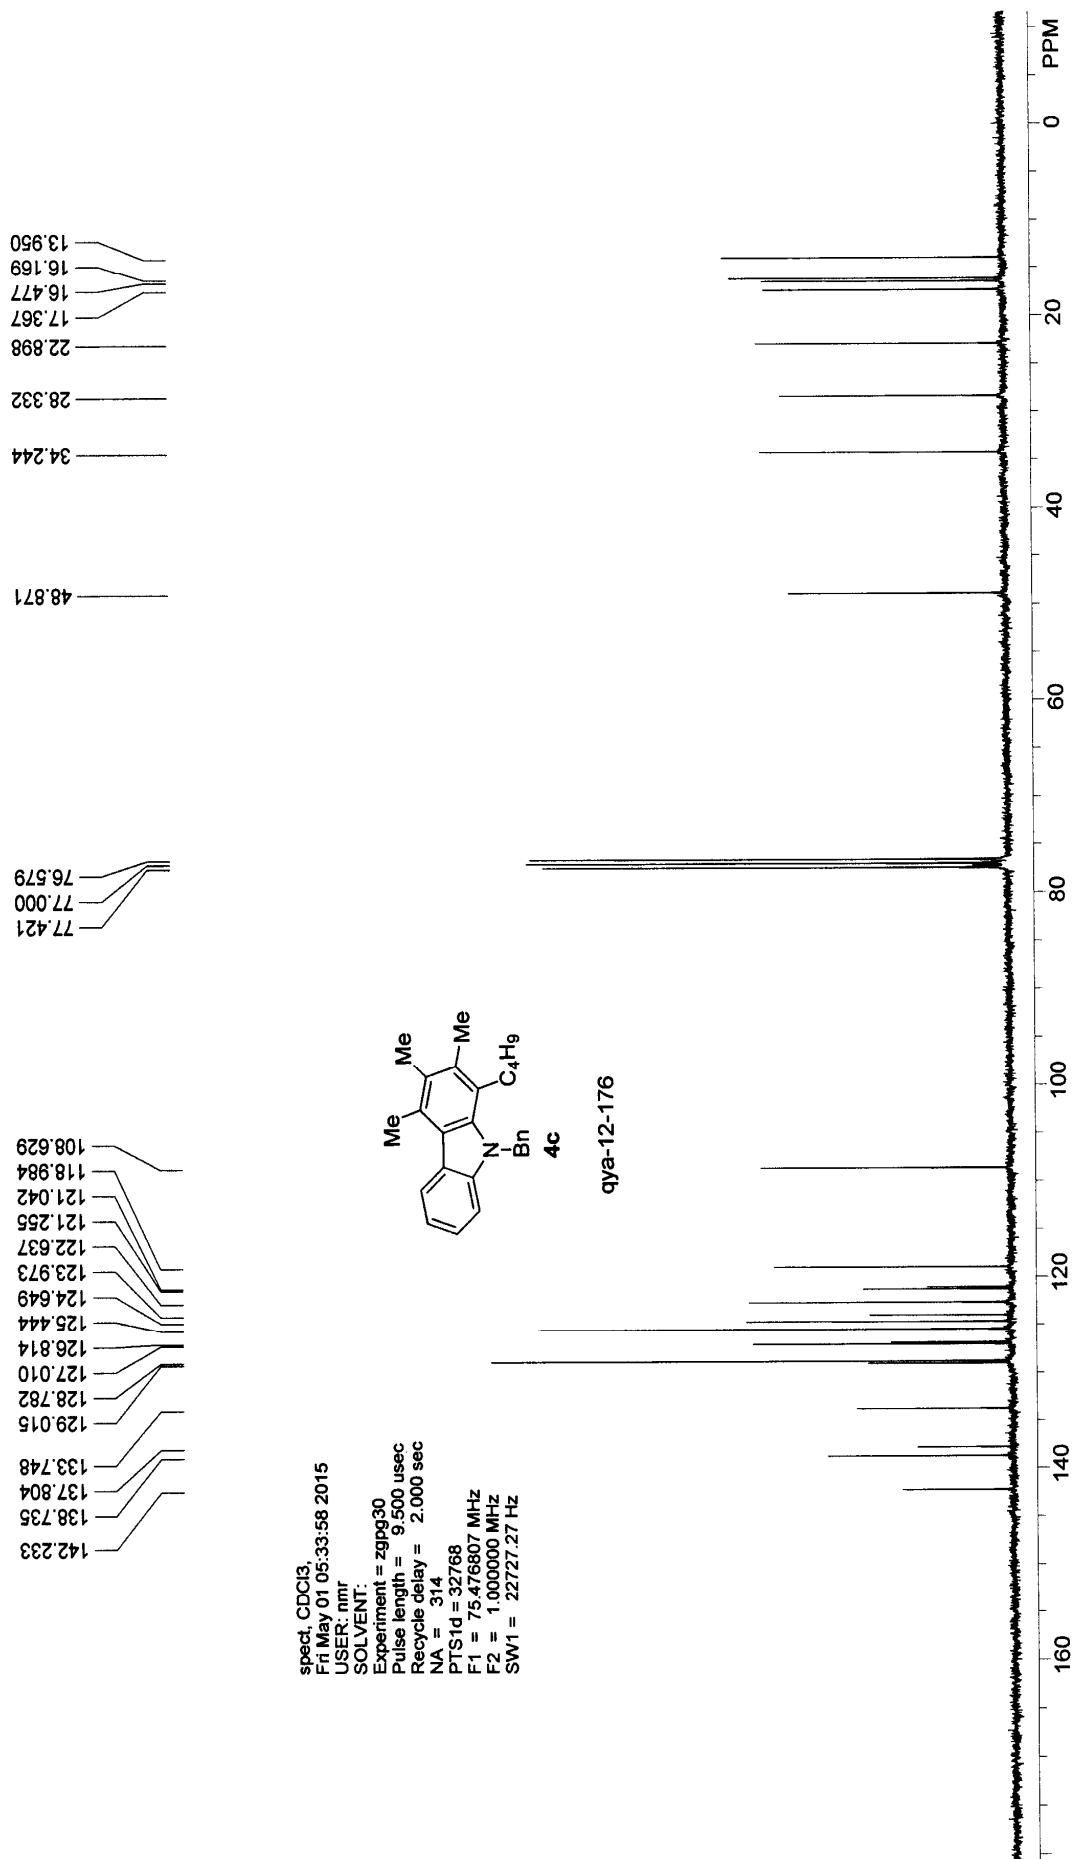

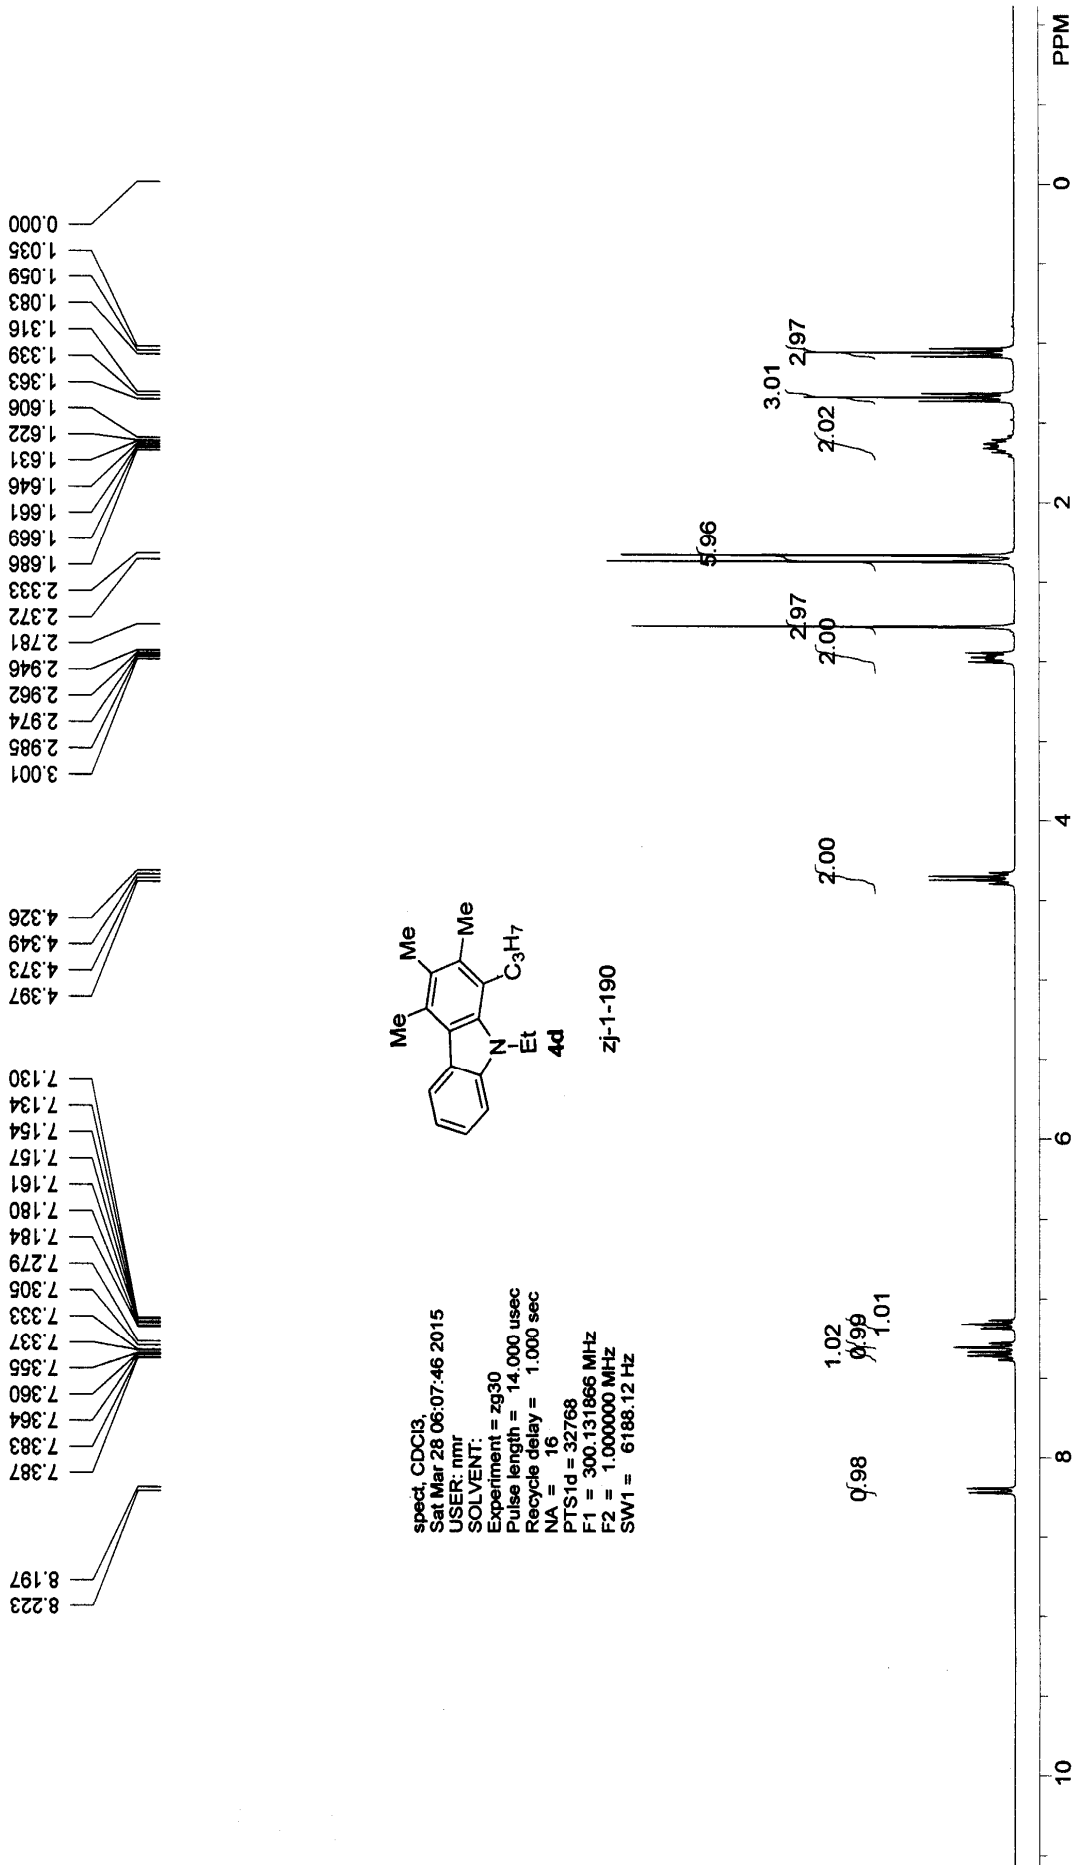

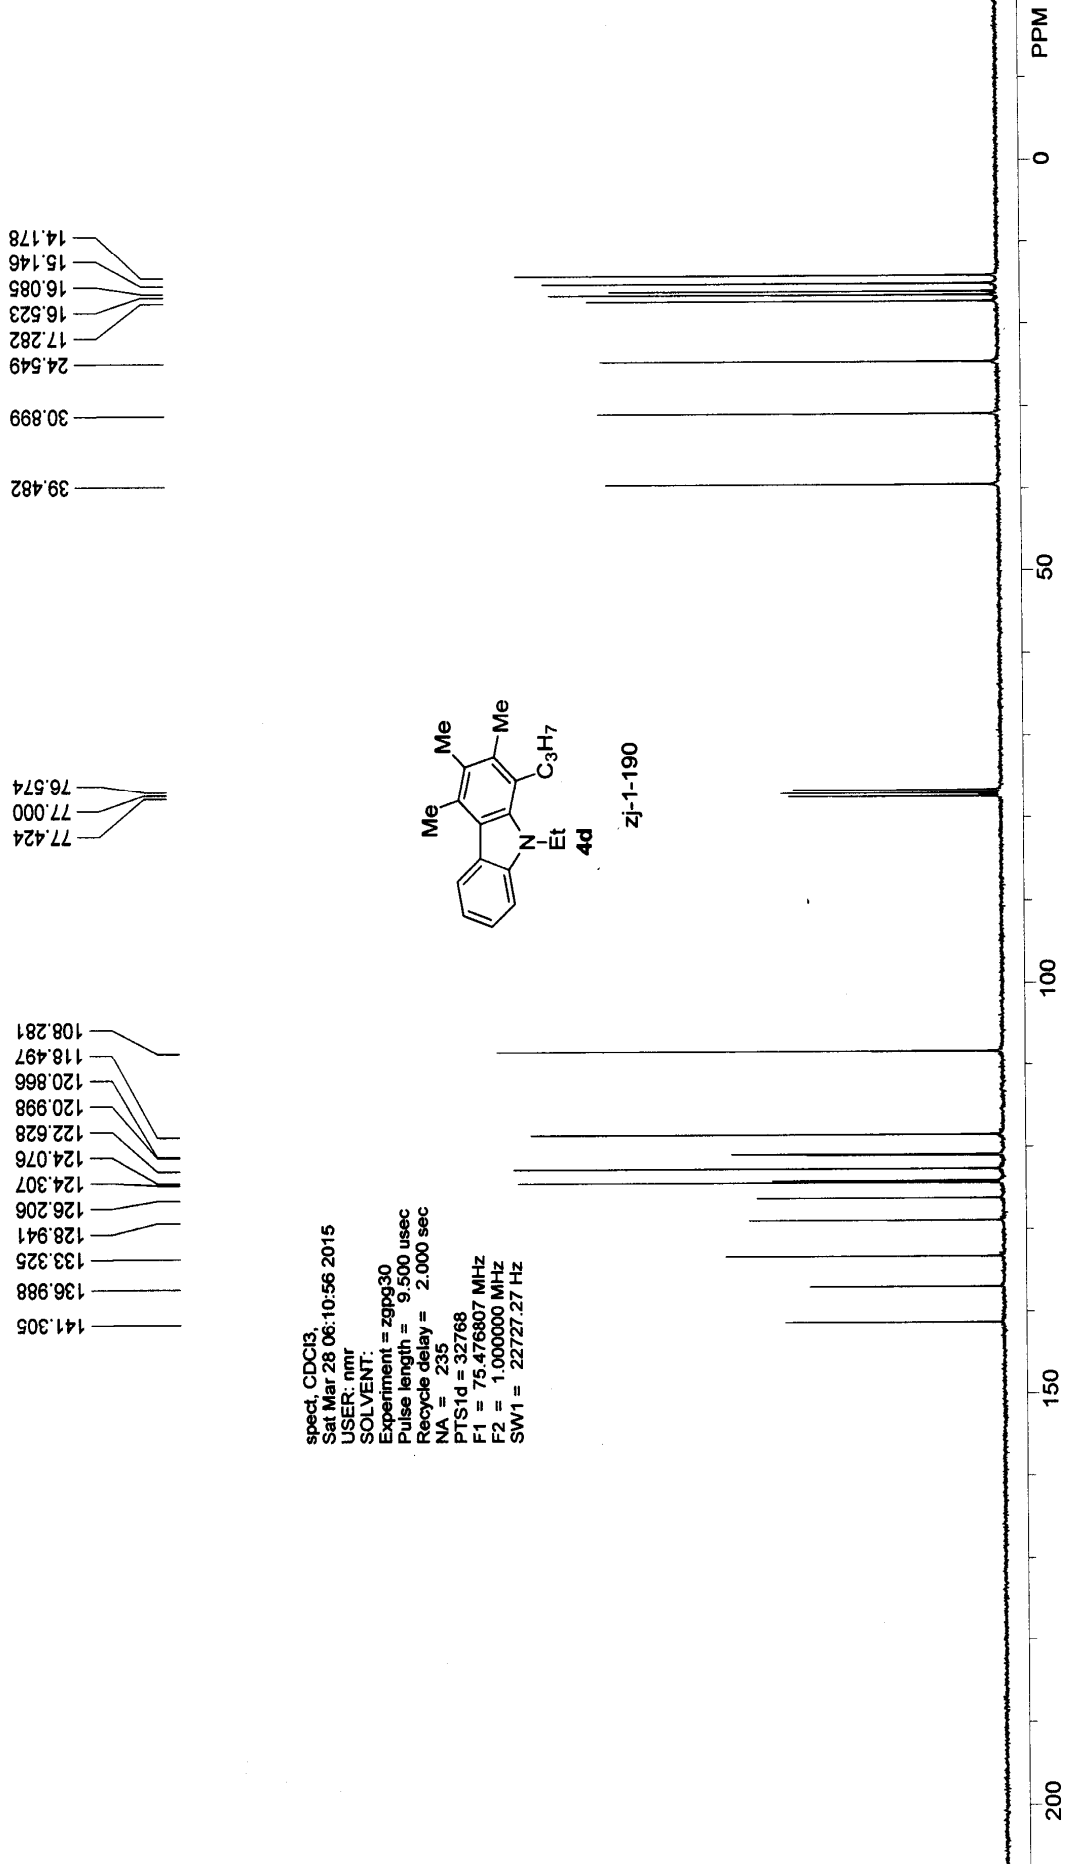

spect, CDCl<sub>3</sub>,  
 Sat Mar 28 06:10:56 2015  
 USER: nmr  
 SOLVENT:  
 Experiment = zpgg30  
 Pulse length = 9.500 usec  
 Recycle delay = 2.000 sec  
 NA = 235  
 PTS1d = 32768  
 F1 = 75.476807 MHz  
 F2 = 1.000000 MHz  
 SW1 = 22727.27 Hz

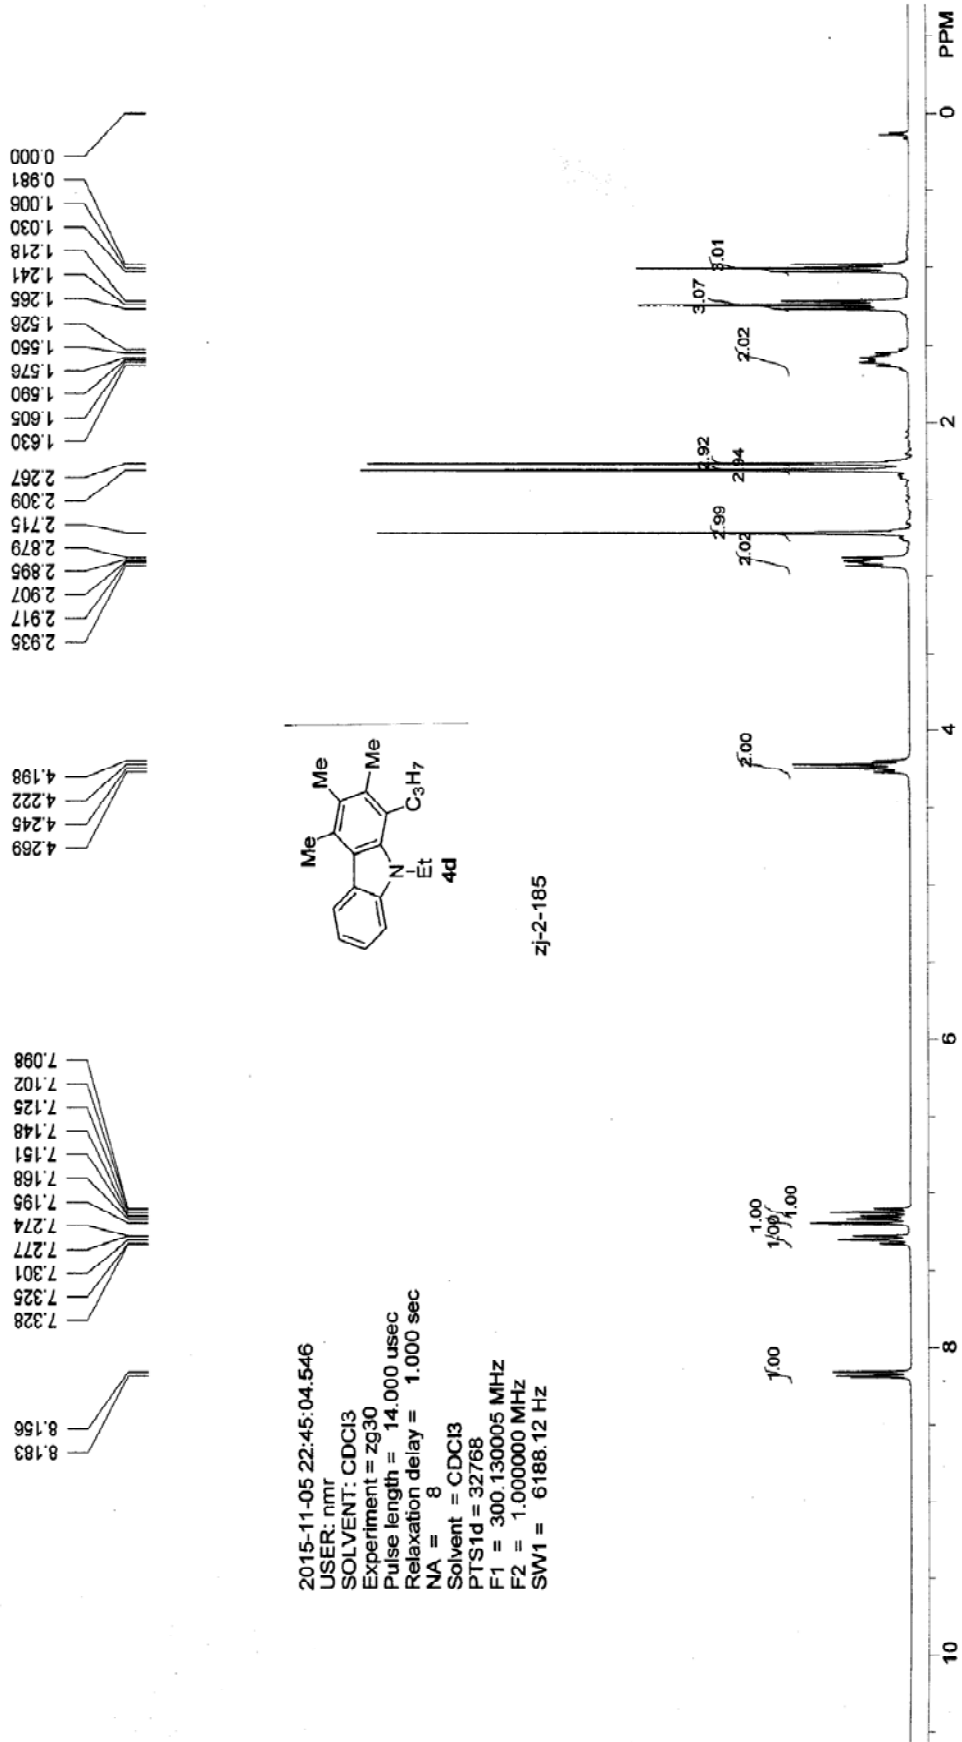



14.091  
15.010  
16.957  
16.398  
17.161  
24.478  
30.829  
39.350

76.577  
77.000  
77.423

108.234  
118.501  
120.762  
121.029  
122.564  
124.108  
124.273  
126.103  
128.842  
133.199  
136.995  
141.306

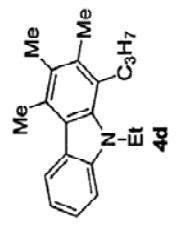

2015-11-05 22:55:25.156  
USER: nmr  
SOLVENT: CDCl<sub>3</sub>  
Experiment = zgpg30  
Pulse length = 9.500 usec  
Relaxation delay = 2.000 sec  
NA = 158  
Solvent = CDCl<sub>3</sub>  
PTS1d = 32768  
F1 = 75.467751 MHz  
F2 = 1.000000 MHz  
SW1 = 22727.27 Hz

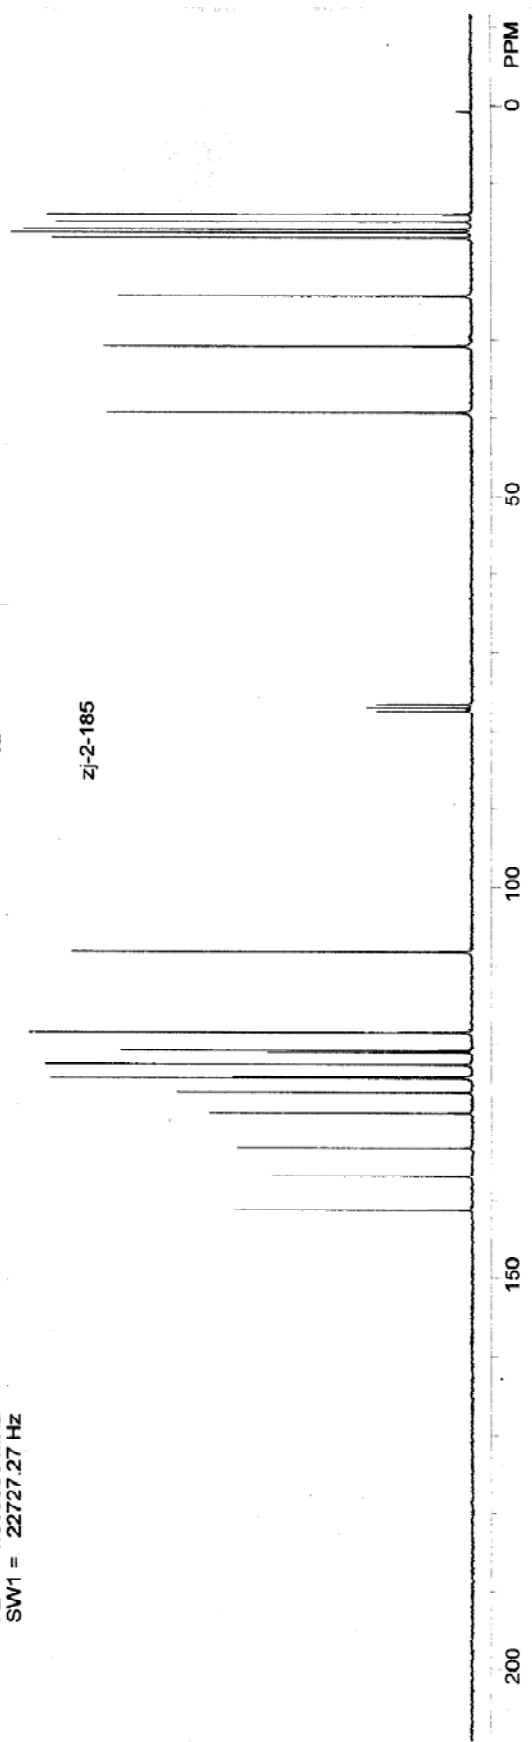

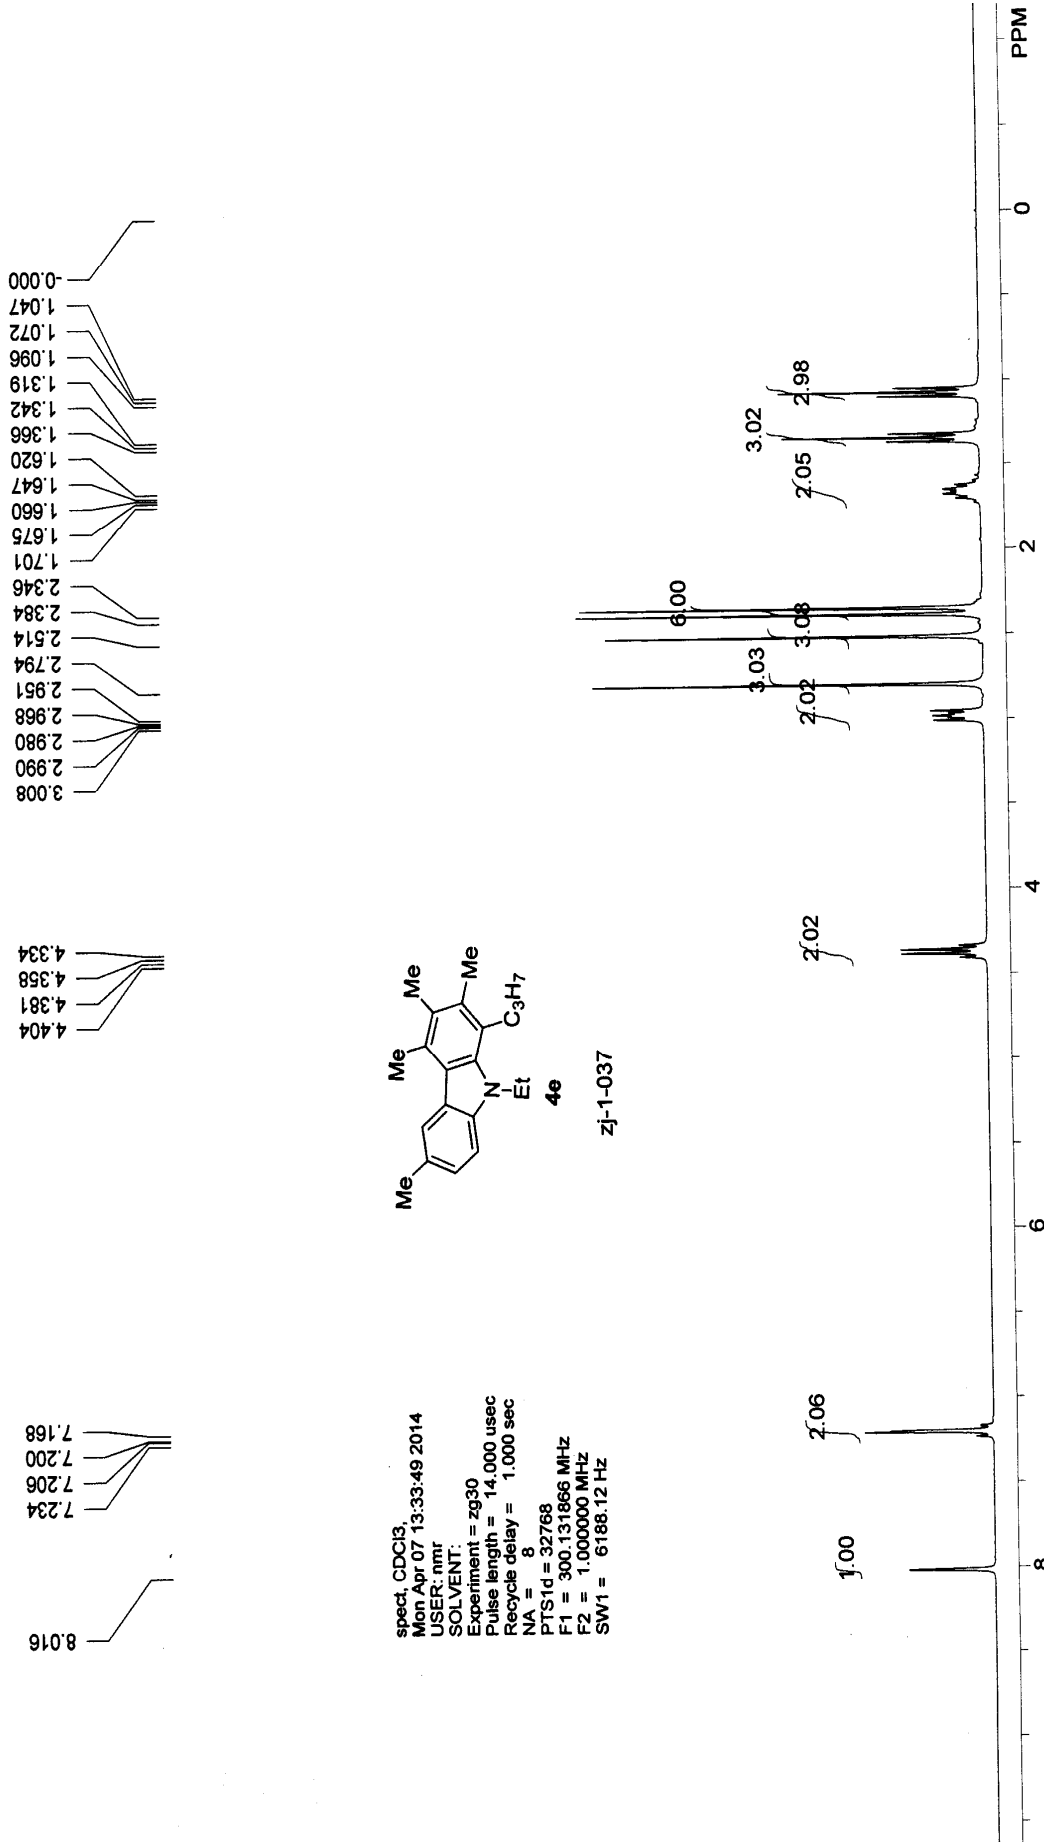

spect, CDCI3,  
 Mon Apr 07 13:37:10 2014  
 USER: nmr  
 SOLVENT:  
 Experiment = zgpg30  
 Pulse length = 9.500 usec  
 Recycle delay = 2.000 sec  
 NA = 98  
 P1 = 32768  
 F1 = 75.476807 MHz  
 F2 = 1.000000 MHz  
 SW1 = 22727.27 Hz

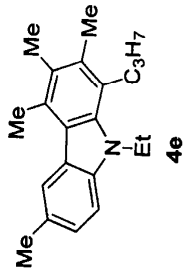

14.209  
 15.135  
 16.113  
 16.531  
 17.380  
 21.624  
 24.514  
 30.930  
 39.584

76.575  
 77.000  
 77.425

108.021  
 120.882  
 120.913  
 122.799  
 124.270  
 125.560  
 125.963  
 127.473  
 128.979  
 133.153  
 137.296  
 139.703

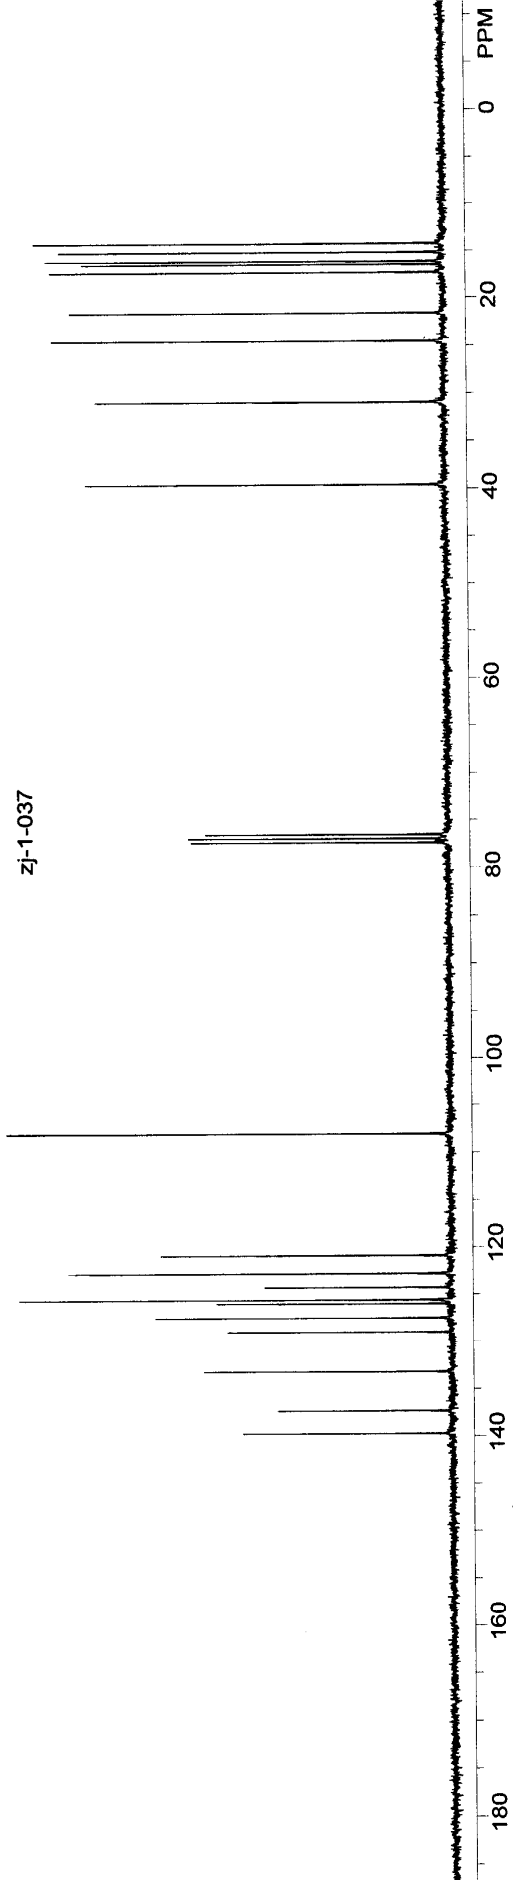

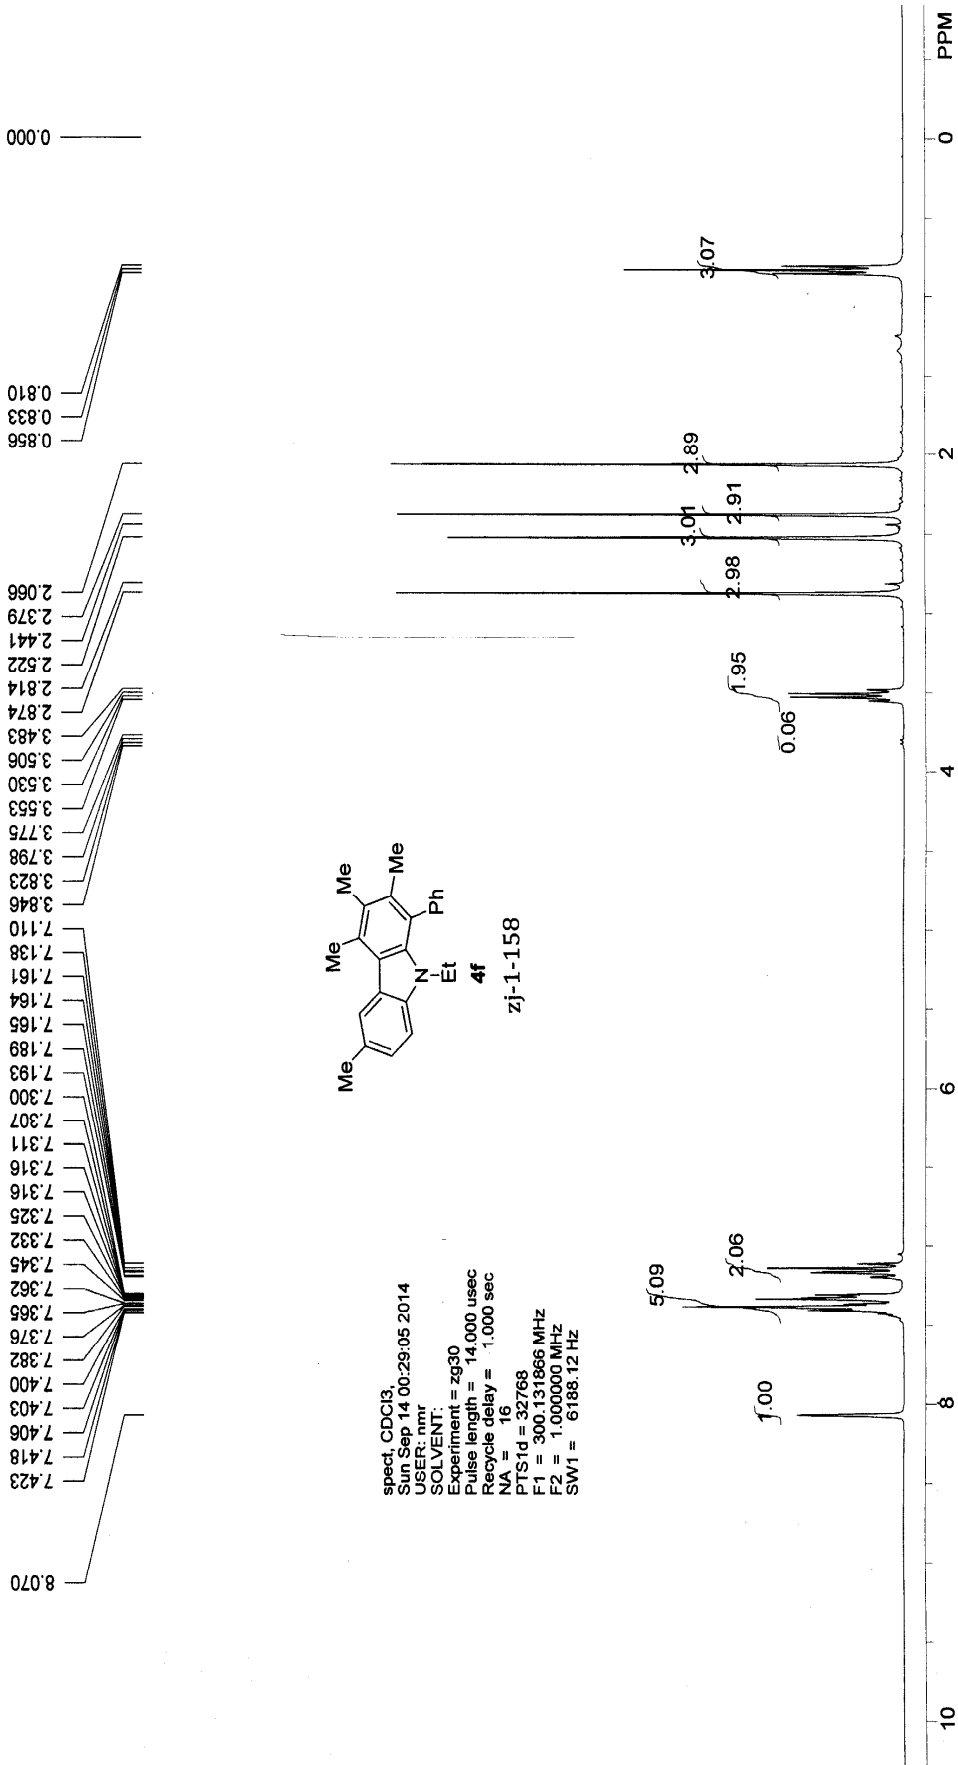

spect, CDCI3,  
 Sun Sep 14 00:31:45 2014  
 USER: nmr  
 SOLVENT:  
 Experiment = zgpg30  
 Pulse length = 9.500 usec  
 Recycle delay = 2.000 sec  
 NA = 85  
 P1 = 32768  
 F1 = 75.476807 MHz  
 F2 = 1.0000000 MHz  
 SW1 = 222727.27 Hz

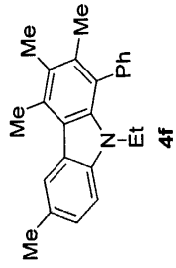

zj-1-158

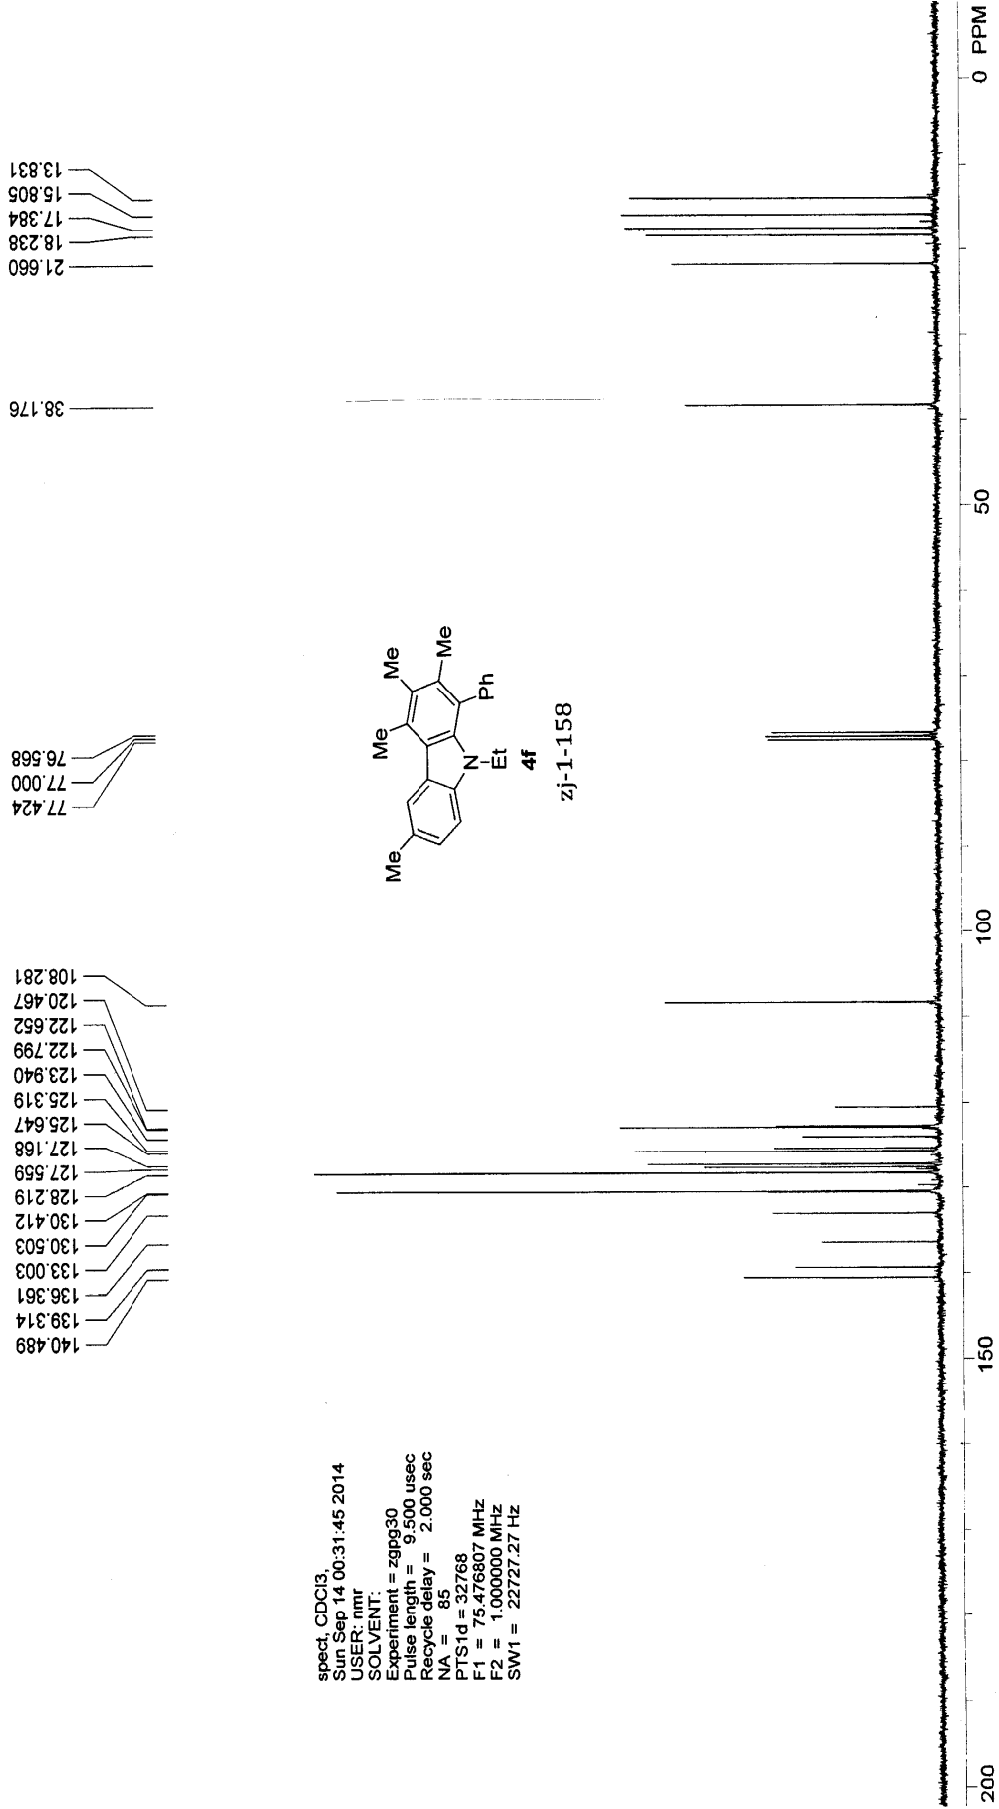

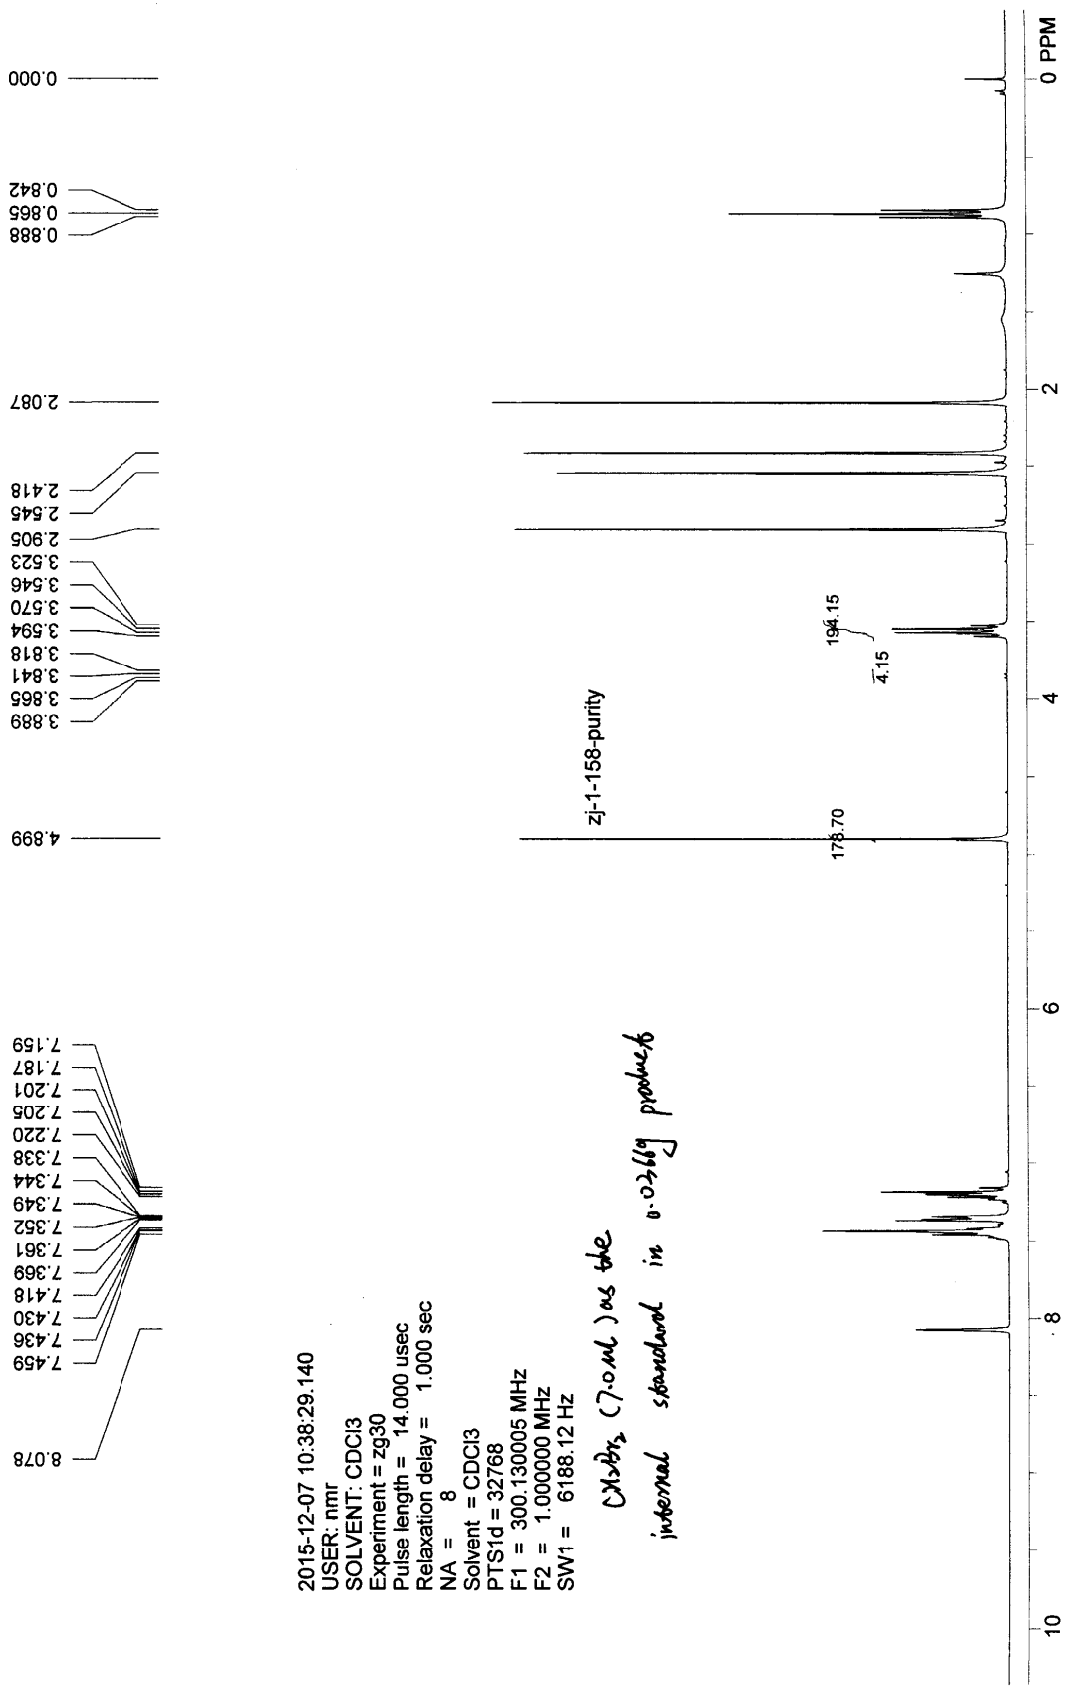

2015-12-07 10:38:29.140  
 USER: nmr  
 SOLVENT: CDCl3  
 Experiment = zg30  
 Pulse length = 14.000 usec  
 Relaxation delay = 1.000 sec  
 NA = 8  
 Solvent = CDCl3  
 PTS1d = 32768  
 F1 = 300.130005 MHz  
 F2 = 1.000000 MHz  
 SW1 = 6188.12 Hz

*CDCl<sub>3</sub> (7.0 mL) as the  
 internal standard in 0.0269 g products*

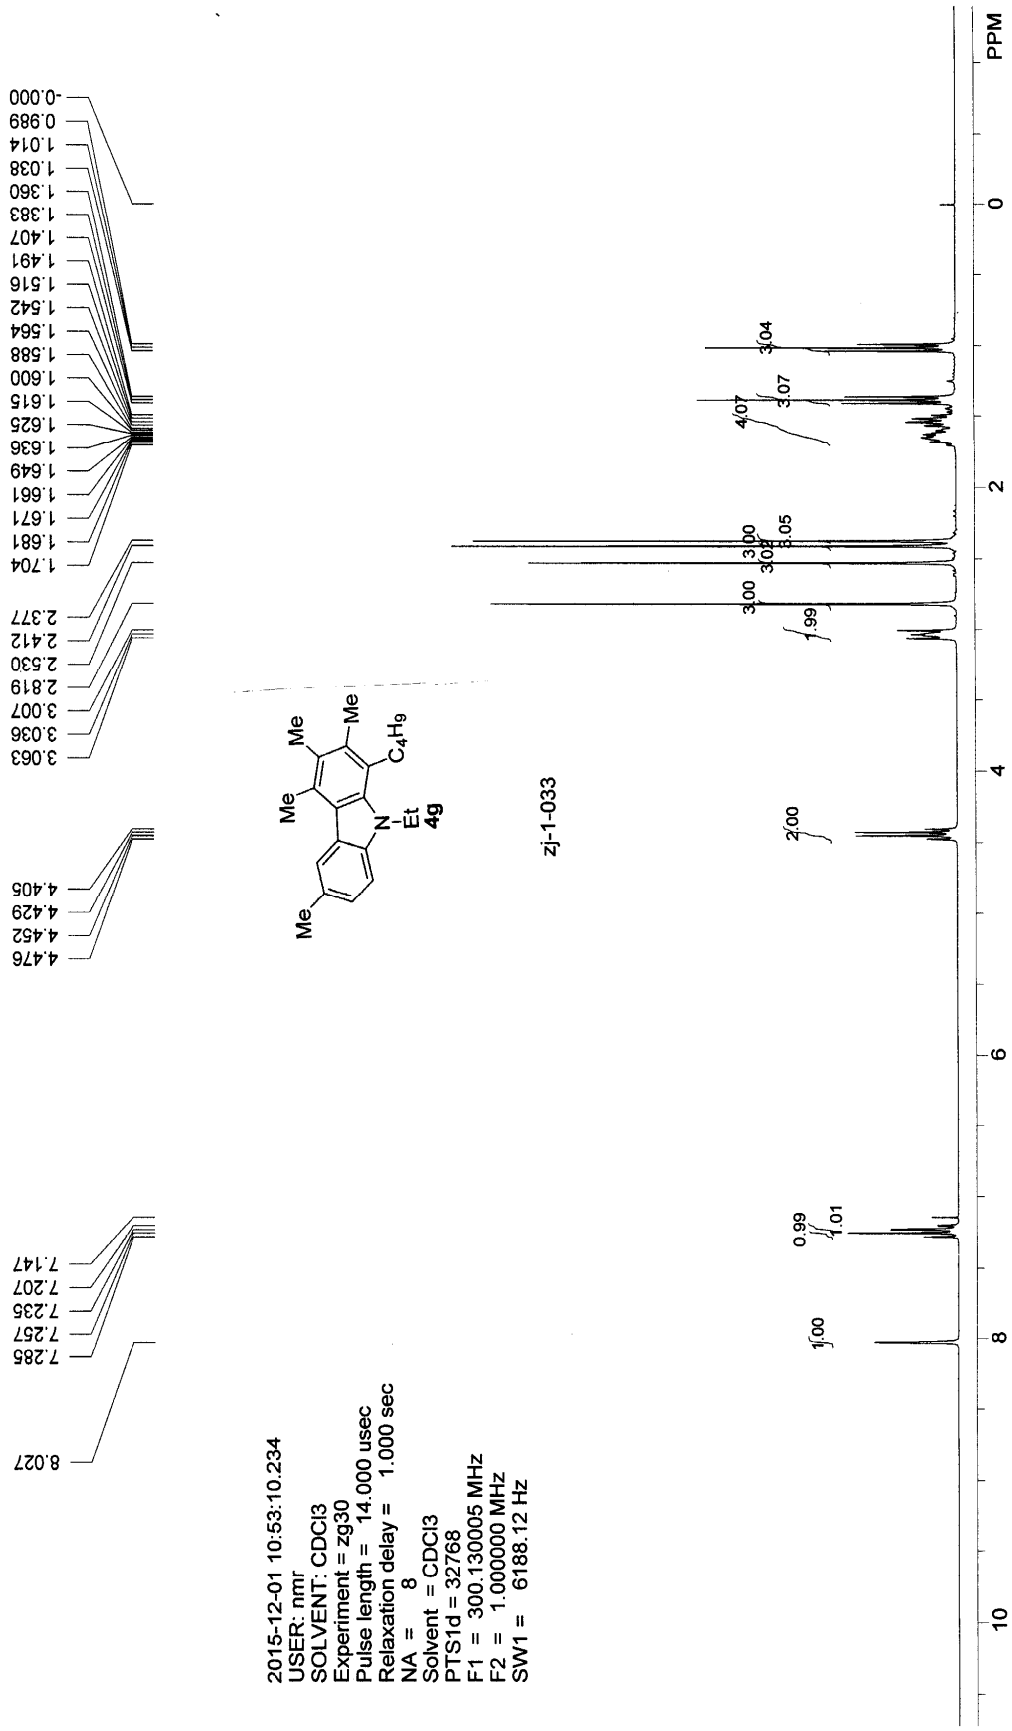

2015-12-01 10:53:10.234  
 USER: nmr  
 SOLVENT: CDCl3  
 Experiment = zg30  
 Pulse length = 14.000 usec  
 Relaxation delay = 1.000 sec  
 NA = 8  
 Solvent = CDCl3  
 P1 = 32768  
 F1 = 300.130005 MHz  
 F2 = 1.000000 MHz  
 SW1 = 6188.12 Hz

2015-12-01 13:29:41.609  
 USER: nmr  
 SOLVENT: CDCl3  
 Experiment = zgpg30  
 Pulse length = 9.500 usec  
 Relaxation delay = 2.000 sec  
 NA = 2253  
 Solvent = CDCl3  
 PTS1d = 32768  
 F1 = 75.467751 MHz  
 F2 = 1.000000 MHz  
 SW1 = 22727.27 Hz

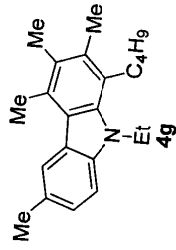

13.935  
 15.121  
 16.141  
 16.527  
 17.391  
 21.619  
 22.980  
 28.559  
 33.458  
 39.672

76.577  
 77.000  
 77.423

108.050  
 120.965  
 120.992  
 122.858  
 124.338  
 125.579  
 126.075  
 127.537  
 128.989  
 133.180  
 137.363  
 139.771

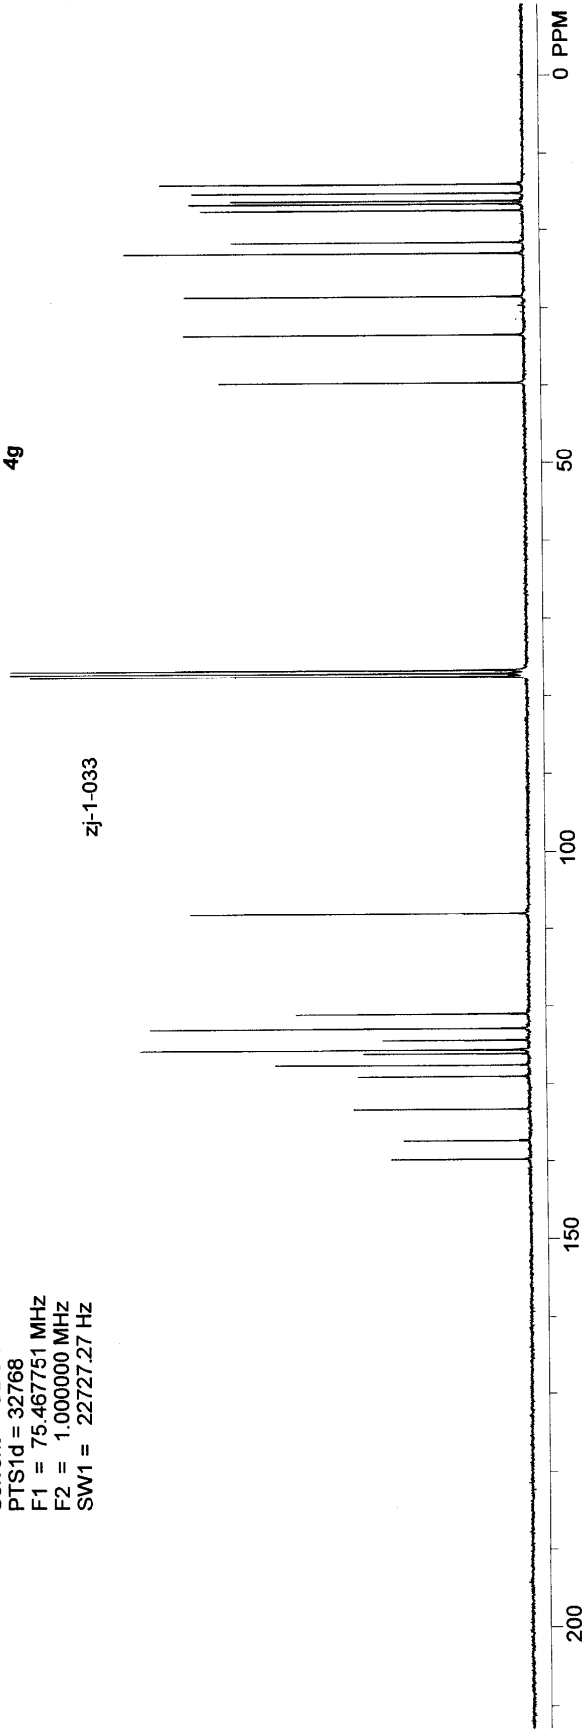



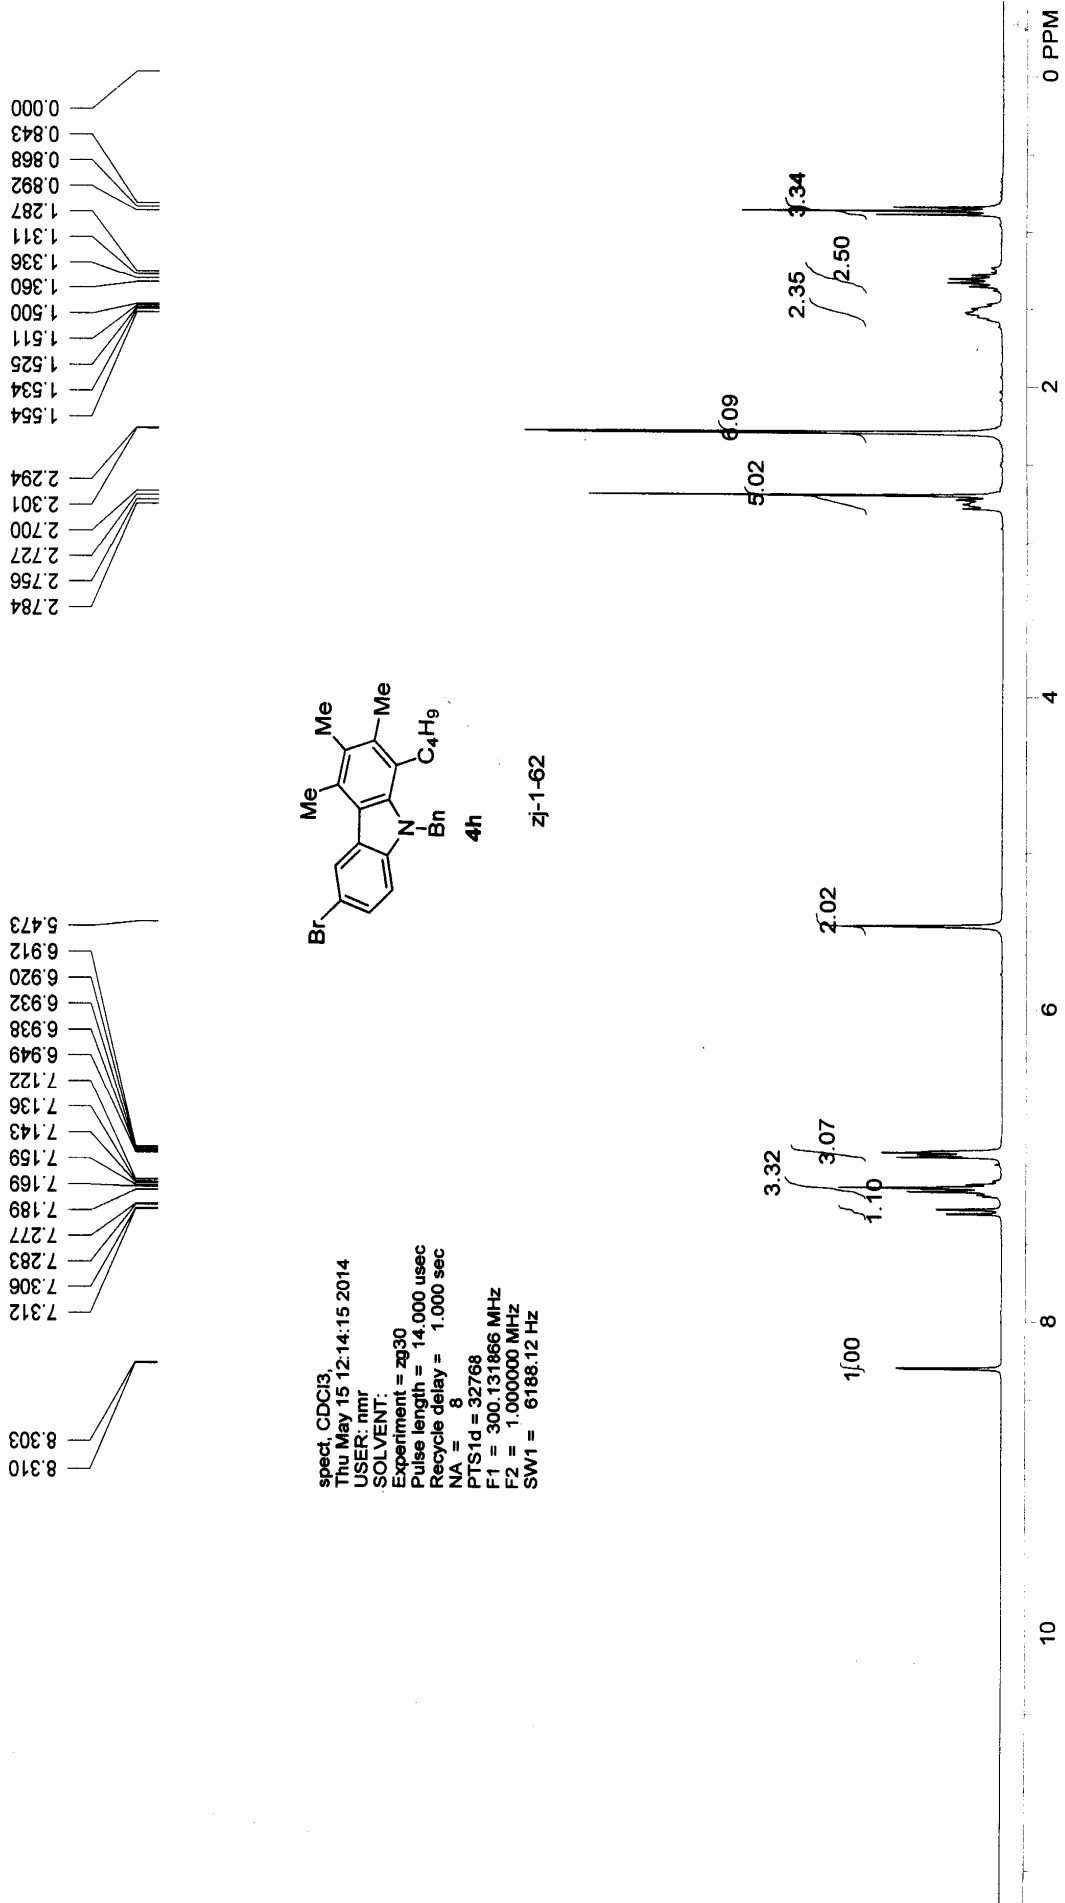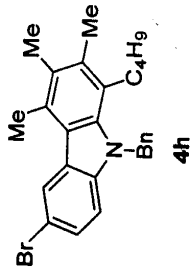

spect, CDCl3,  
 Thu May 15 12:14:15 2014  
 USER: nmr  
 SOLVENT:  
 Experiment = zg30  
 Pulse length = 14.000 usec  
 Recycle delay = 1.000 sec  
 NA = 8  
 PTS1d = 32768  
 F1 = 300.131866 MHz  
 F2 = 1.000000 MHz  
 SW1 = 6188.12 Hz

2.784  
 2.756  
 2.727  
 2.700  
 2.301  
 2.294  
 1.554  
 1.534  
 1.525  
 1.511  
 1.500  
 1.360  
 1.336  
 1.311  
 1.287  
 0.892  
 0.868  
 0.843  
 0.000

7.312  
 7.306  
 7.283  
 7.277  
 7.189  
 7.169  
 7.169  
 7.143  
 7.136  
 7.122  
 6.949  
 6.938  
 6.932  
 6.920  
 6.912  
 5.473

2.35  
 3.34  
 2.50

6.09

5.02

2.02

3.32

3.07

1.10

1.00

10 8 6 4 2 0 PPM

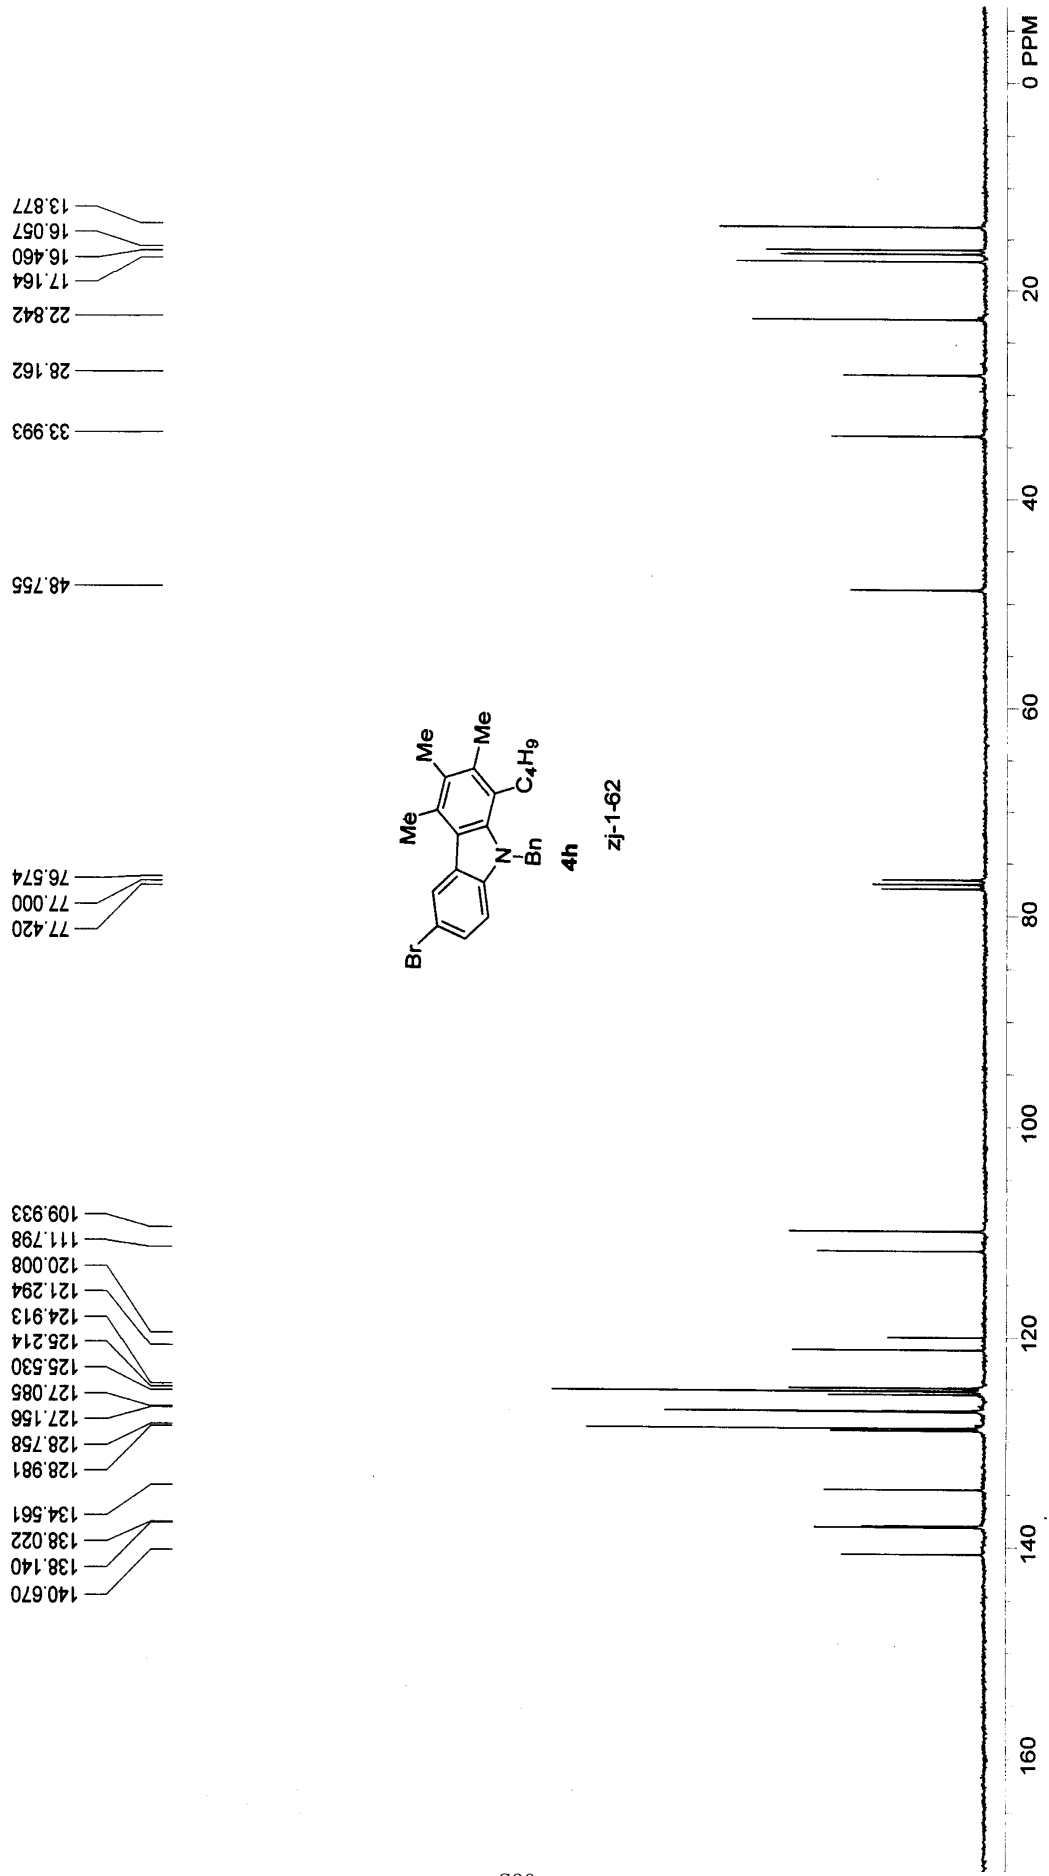

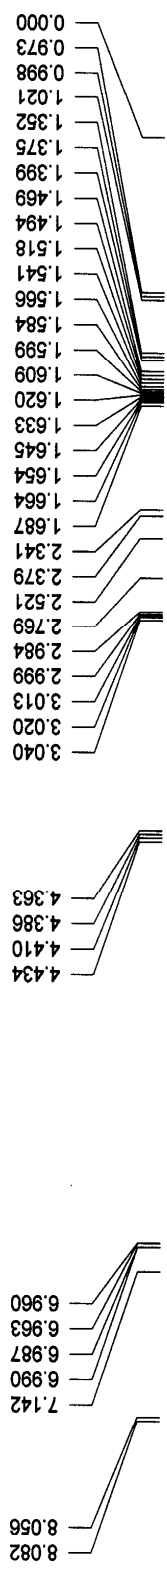

spect, CDCl3,  
 Fri Jun 27 07:26:29 2014  
 USER: nmr  
 SOLVENT:  
 Experiment = zg30  
 Pulse length = 14.000 usec  
 Recycle delay = 1.000 sec  
 NA = 8  
 P1 = 32768  
 F1 = 300.131866 MHz  
 F2 = 1.000000 MHz  
 SW1 = 6188.12 Hz

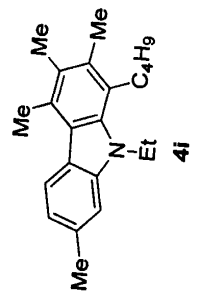

zj-1-126

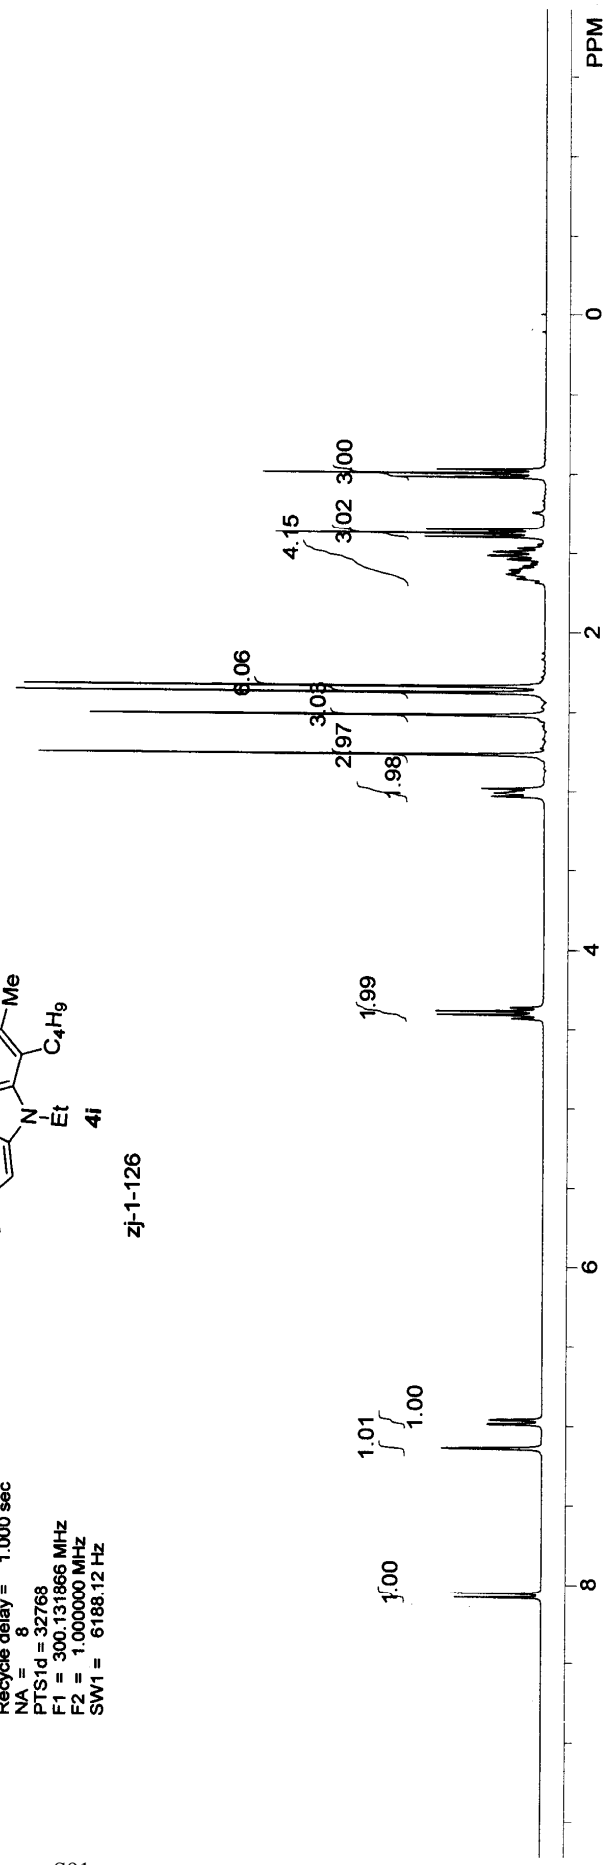

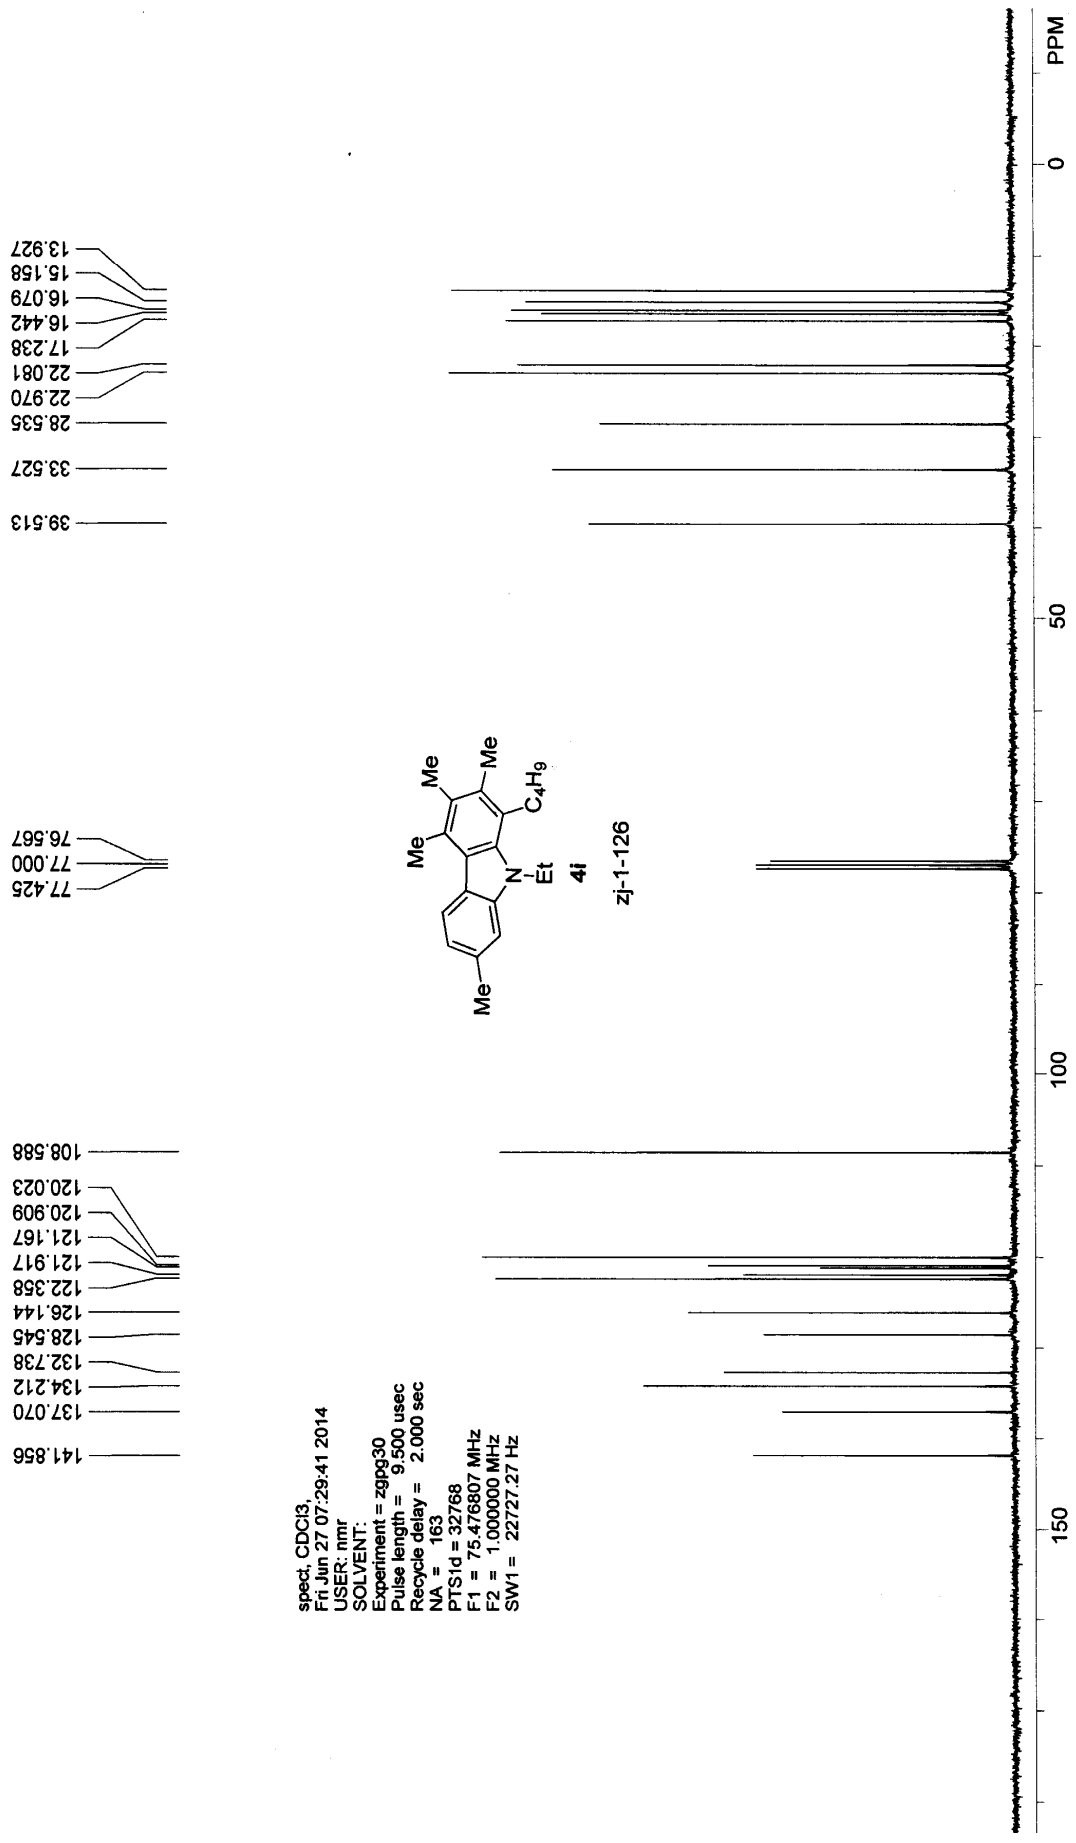

spect. CDC13  
 Fri Jun 27 07:29:41 2014  
 USER: nmr  
 SOLVENT:  
 Experiment = zqpg30  
 Pulse length = 9.500 usec  
 Recycle delay = 2.000 sec  
 NA = 163  
 PTS1d = 32768  
 F1 = 75.476807 MHz  
 F2 = 1.000000 MHz  
 SW1 = 22727.27 Hz

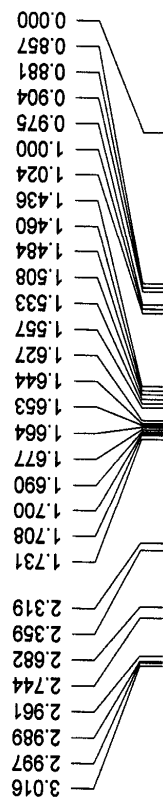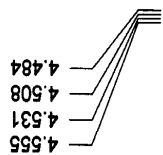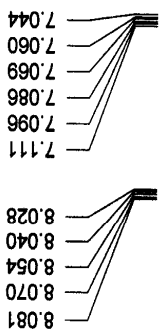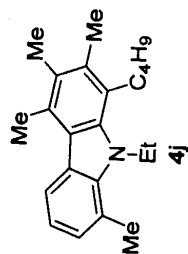

zj-1-078

spect, CDC13,  
Thu May 15 12:33:44 2014  
USER: nmr  
SOLVENT:  
Experiment = zg30  
Pulse length = 14.000 usec  
Recycle delay = 1.000 sec  
NA = 8  
PTS1d = 32768  
F1 = 300.131866 MHz  
F2 = 1.000000 MHz  
SW1 = 6188.12 Hz

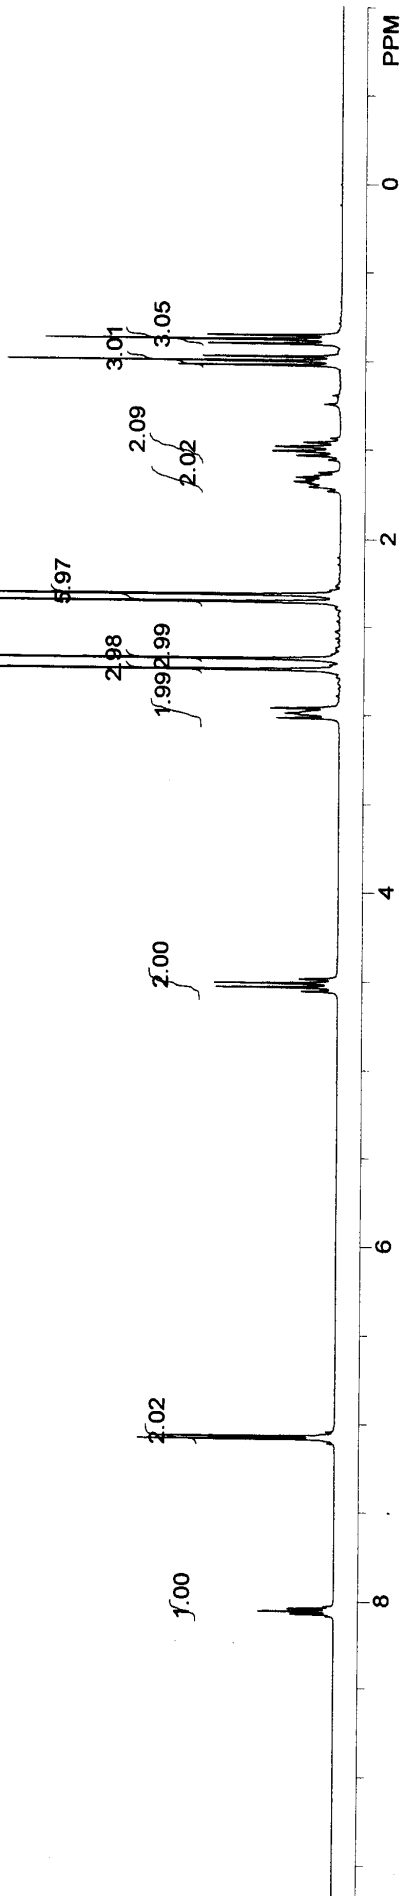

13.963  
14.015  
16.188  
16.667  
17.258  
21.074  
23.179  
29.325  
32.152  
41.484

76.580  
77.000  
77.432

119.736  
120.616  
121.200  
122.637  
123.344  
127.350  
127.572  
128.075  
128.522  
133.452  
140.246  
142.425

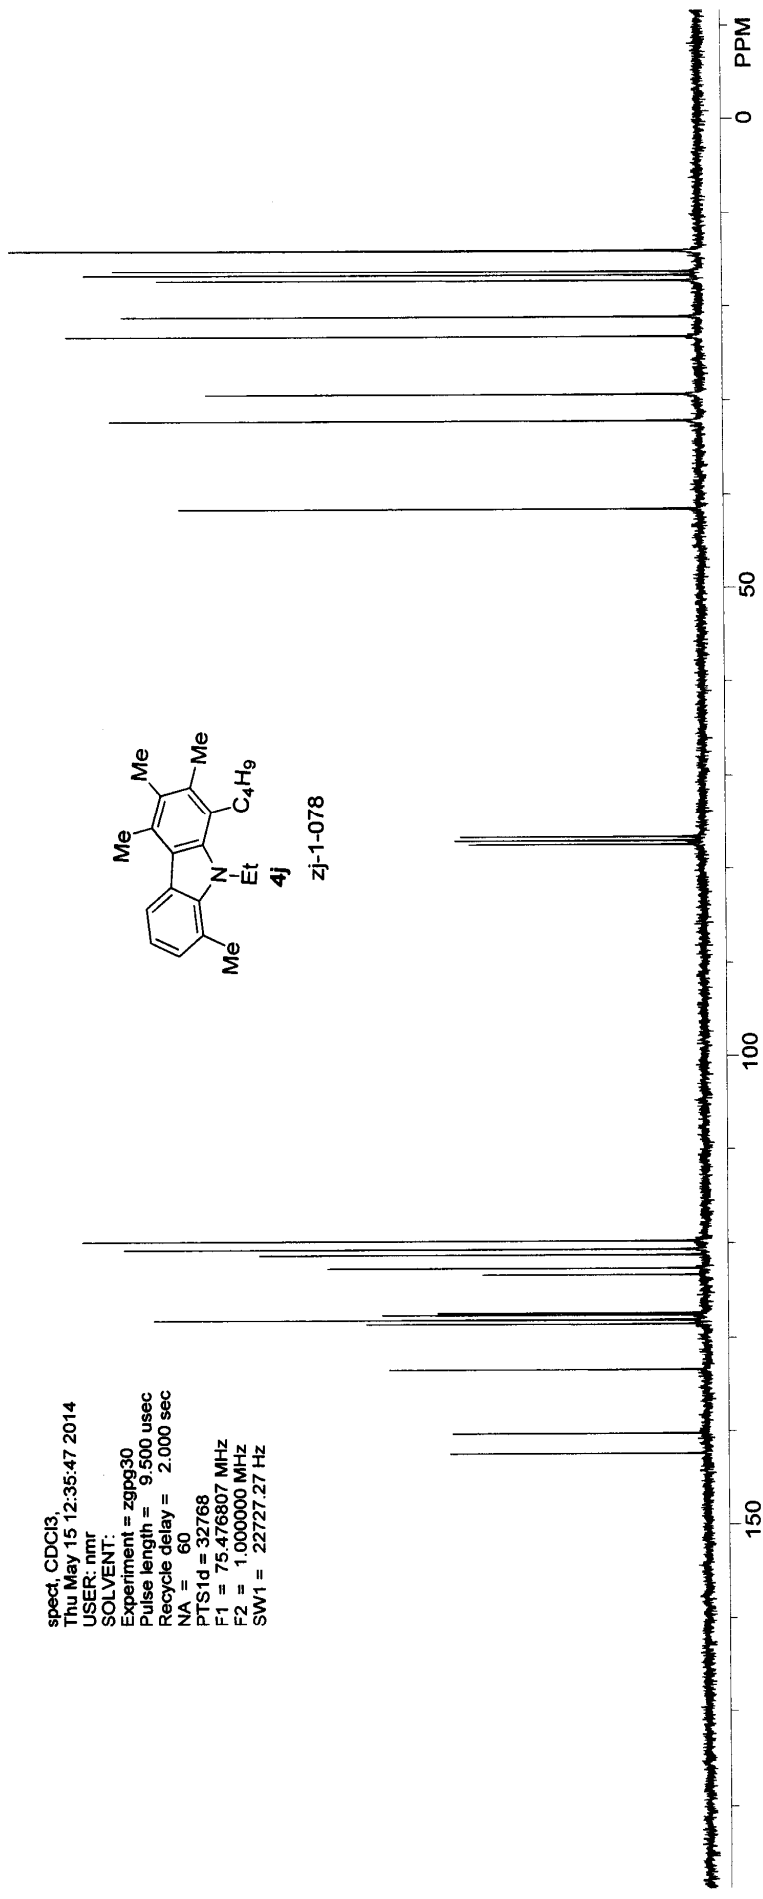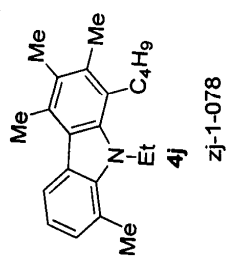

spect\_CDCI3,  
 Thu May 15 12:35:47 2014  
 USER: nmr  
 SOLVENT:  
 Experiment = zgpg30  
 Pulse length = 9.500 usec  
 Recycle delay = 2.000 sec  
 NA = 60  
 PTS1d = 32768  
 F1 = 75.476807 MHz  
 F2 = 1.000000 MHz  
 SW1 = 22727.27 Hz

8.236  
 8.209  
 7.394  
 7.391  
 7.372  
 7.367  
 7.363  
 7.355  
 7.345  
 7.341  
 7.331  
 7.328  
 7.315  
 7.304  
 7.189  
 7.184  
 7.167  
 7.162  
 7.158  
 7.141  
 7.136  
 4.443  
 4.419  
 4.395  
 4.372  
 3.506  
 3.487  
 3.473  
 3.027  
 3.008  
 2.992  
 2.978  
 2.819  
 2.806  
 2.779  
 2.418  
 1.819  
 1.736  
 1.683  
 1.657  
 1.639  
 1.574  
 1.550  
 1.526  
 1.501  
 1.477  
 1.434  
 1.410  
 1.386  
 1.330  
 1.307  
 1.283  
 1.029  
 1.005  
 0.981  
 0.000

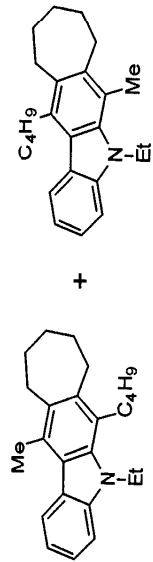

spect, CDCl<sub>3</sub>,  
 Sun Oct 19 03:04:00 2014  
 USER: nmr  
 SOLVENT:  
 Experiment = zg30  
 Pulse length = 14.000 usec  
 Relaxation delay = 1.000 sec  
 NA = 8  
 PTS1d = 32768  
 F1 = 300.131866 MHz  
 F2 = 1.000000 MHz  
 SW1 = 6188.12 Hz

4k:3k=88:12

zj-2-007

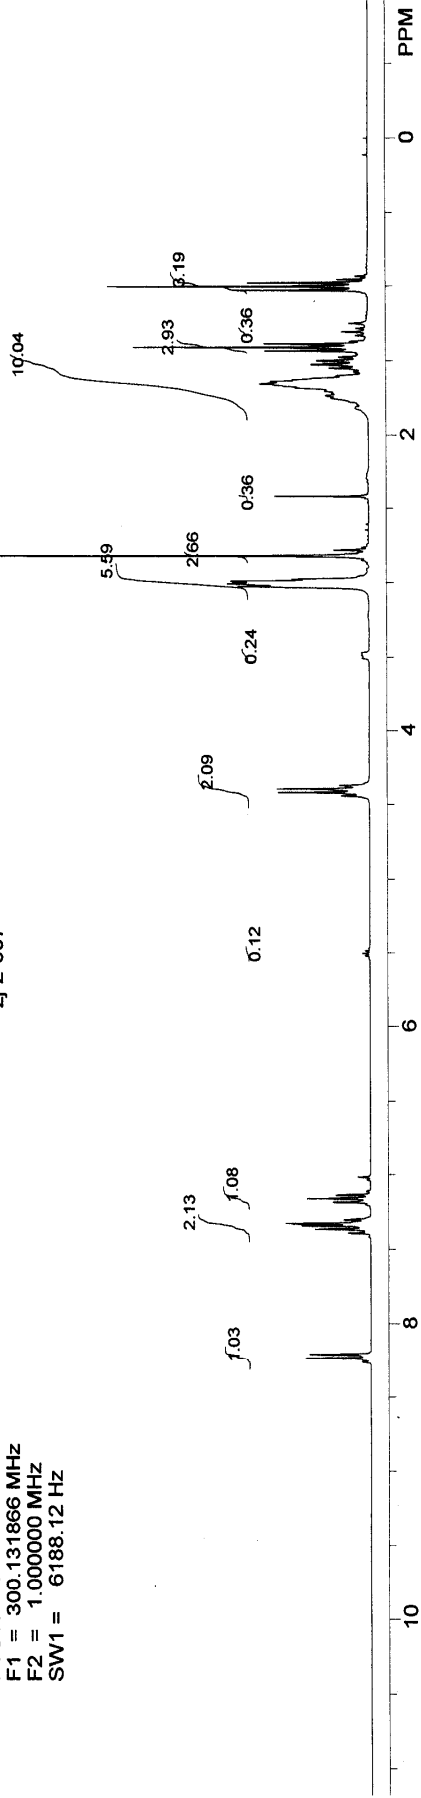

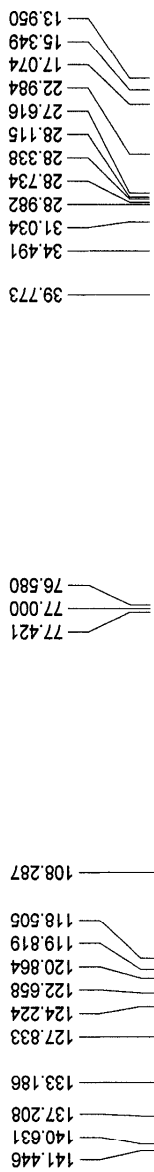

spect. CDCl<sub>3</sub>  
 Sun Oct 19 05:06:24 2014  
 USER: nmr  
 SOLVENT:  
 Experiment = zgpg30  
 Pulse length = 9.500 usec  
 Recycle delay = 2.000 sec  
 NA = 145  
 P1 = 32768  
 F1 = 75.476807 MHz  
 F2 = 1.000000 MHz  
 SW1 = 22727.27 Hz

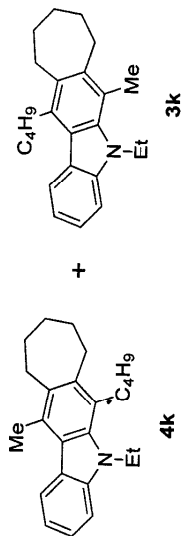

4k:3k=88:12

zj-2-007

150 100 50 0 PPM



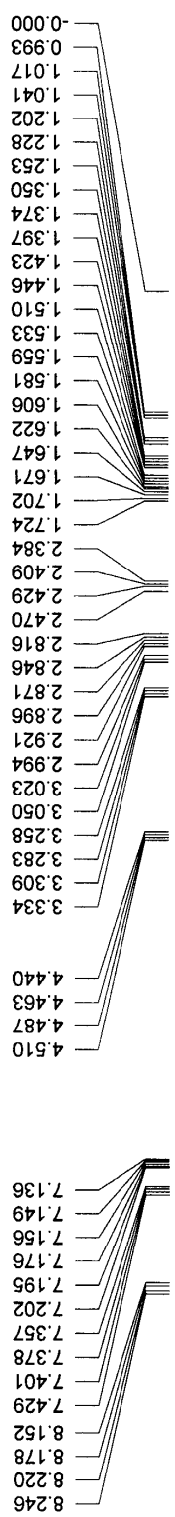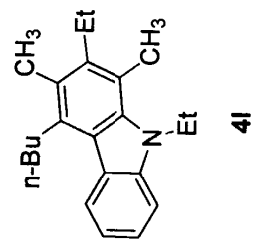

2016-04-01 22:36:55.015  
 USER: nmr  
 SOLVENT: CDCl<sub>3</sub>  
 Experiment = zg30  
 Pulse length = 14.000 usec  
 Relaxation delay = 1.000 sec  
 NA = 34  
 Solvent = CDCl<sub>3</sub>  
 PTS1d = 32768  
 F1 = 300.130005 MHz  
 F2 = 1.000000 MHz  
 SW1 = 6188.12 Hz

zj-5-176-2

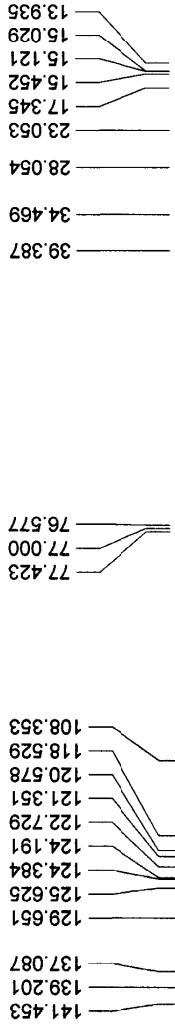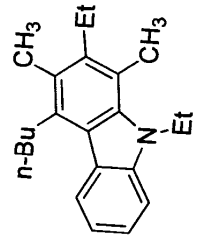

2016-04-02 09:41:21.234  
 USER: nmr  
 SOLVENT: CDCl3  
 Experiment = zgpg30  
 Pulse length = 9.500 usec  
 Relaxation delay = 2.000 sec  
 NA = 7323  
 Solvent = CDCl3  
 PTS1d = 32768  
 F1 = 75.467751 MHz  
 F2 = 1.000000 MHz  
 SW1 = 22727.27 Hz

2016-04-01 22:48:29.250  
 USER: nmr  
 SOLVENT: CDCl3  
 Experiment = zg30  
 Pulse length = 14.000 usec  
 Relaxation delay = 1.000 sec  
 NA = 27  
 Solvent = CDCl3  
 PTS1d = 32768  
 F1 = 300.130005 MHz  
 F2 = 1.000000 MHz  
 SW1 = 6188.12 Hz

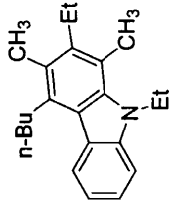

4l (purity: 92%)

zj-5-176-2-purity

*CDCl3 (10.5 ml) as the internal standard in 0.924 g product*

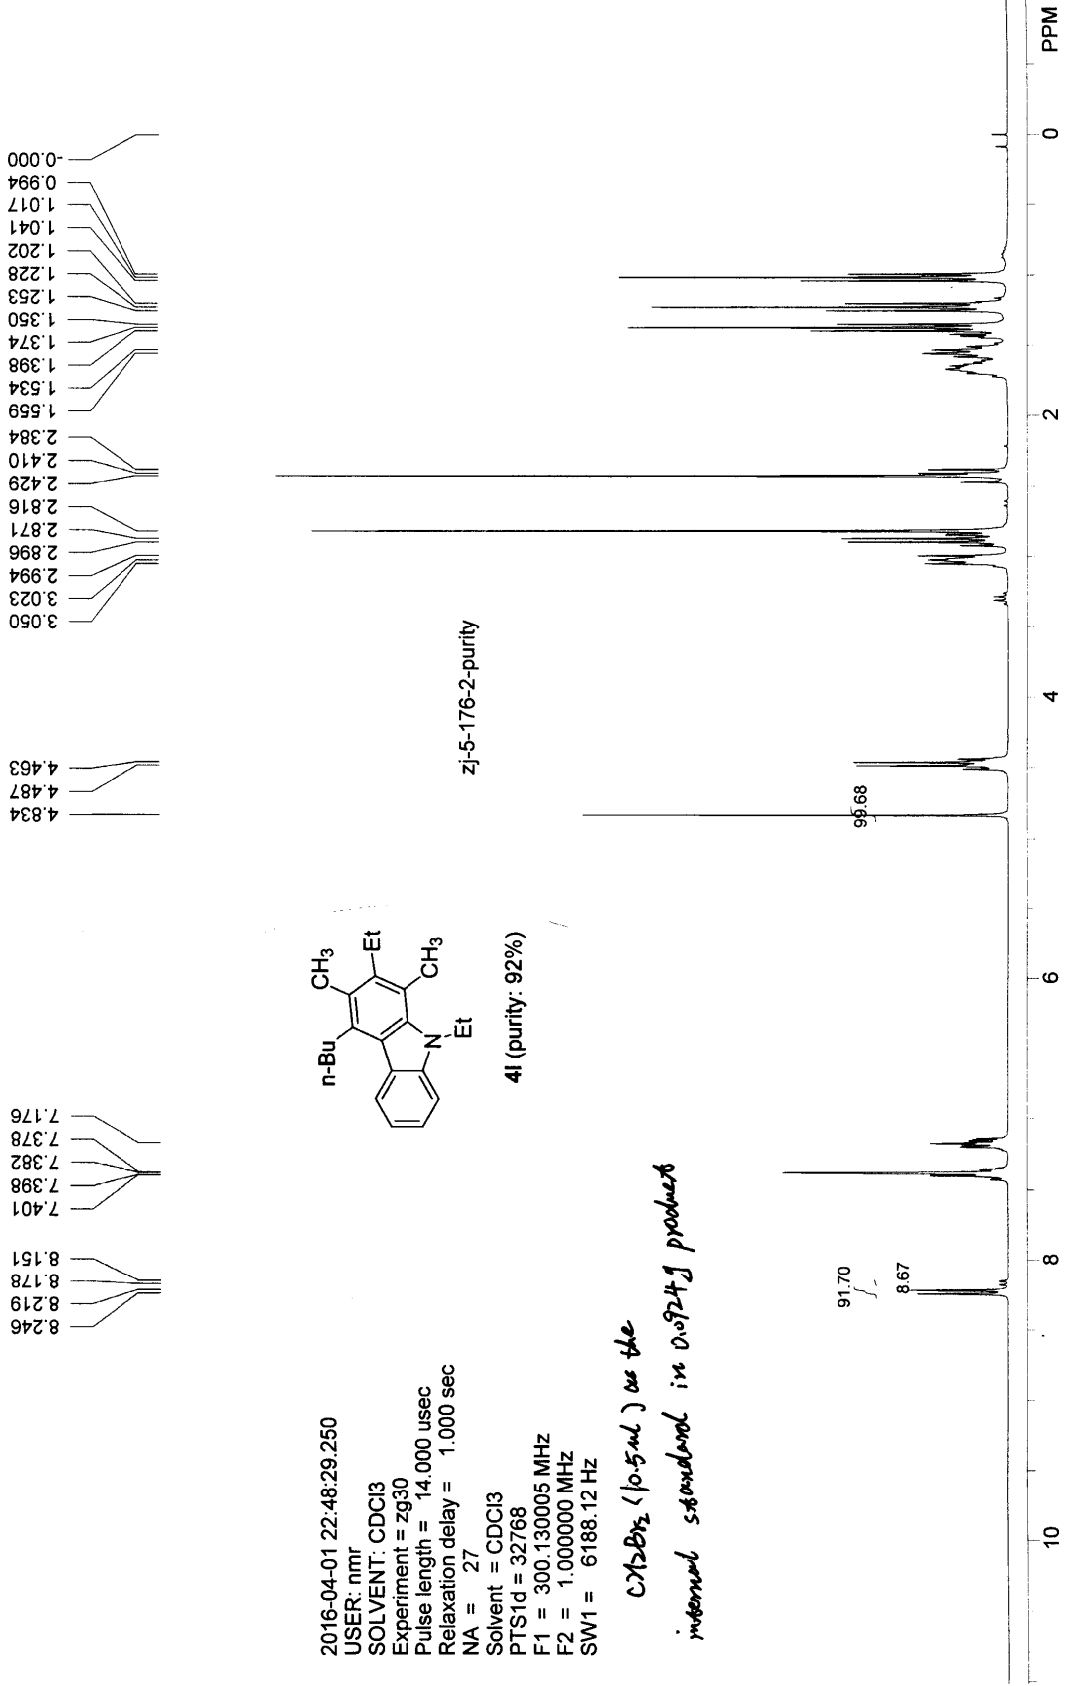

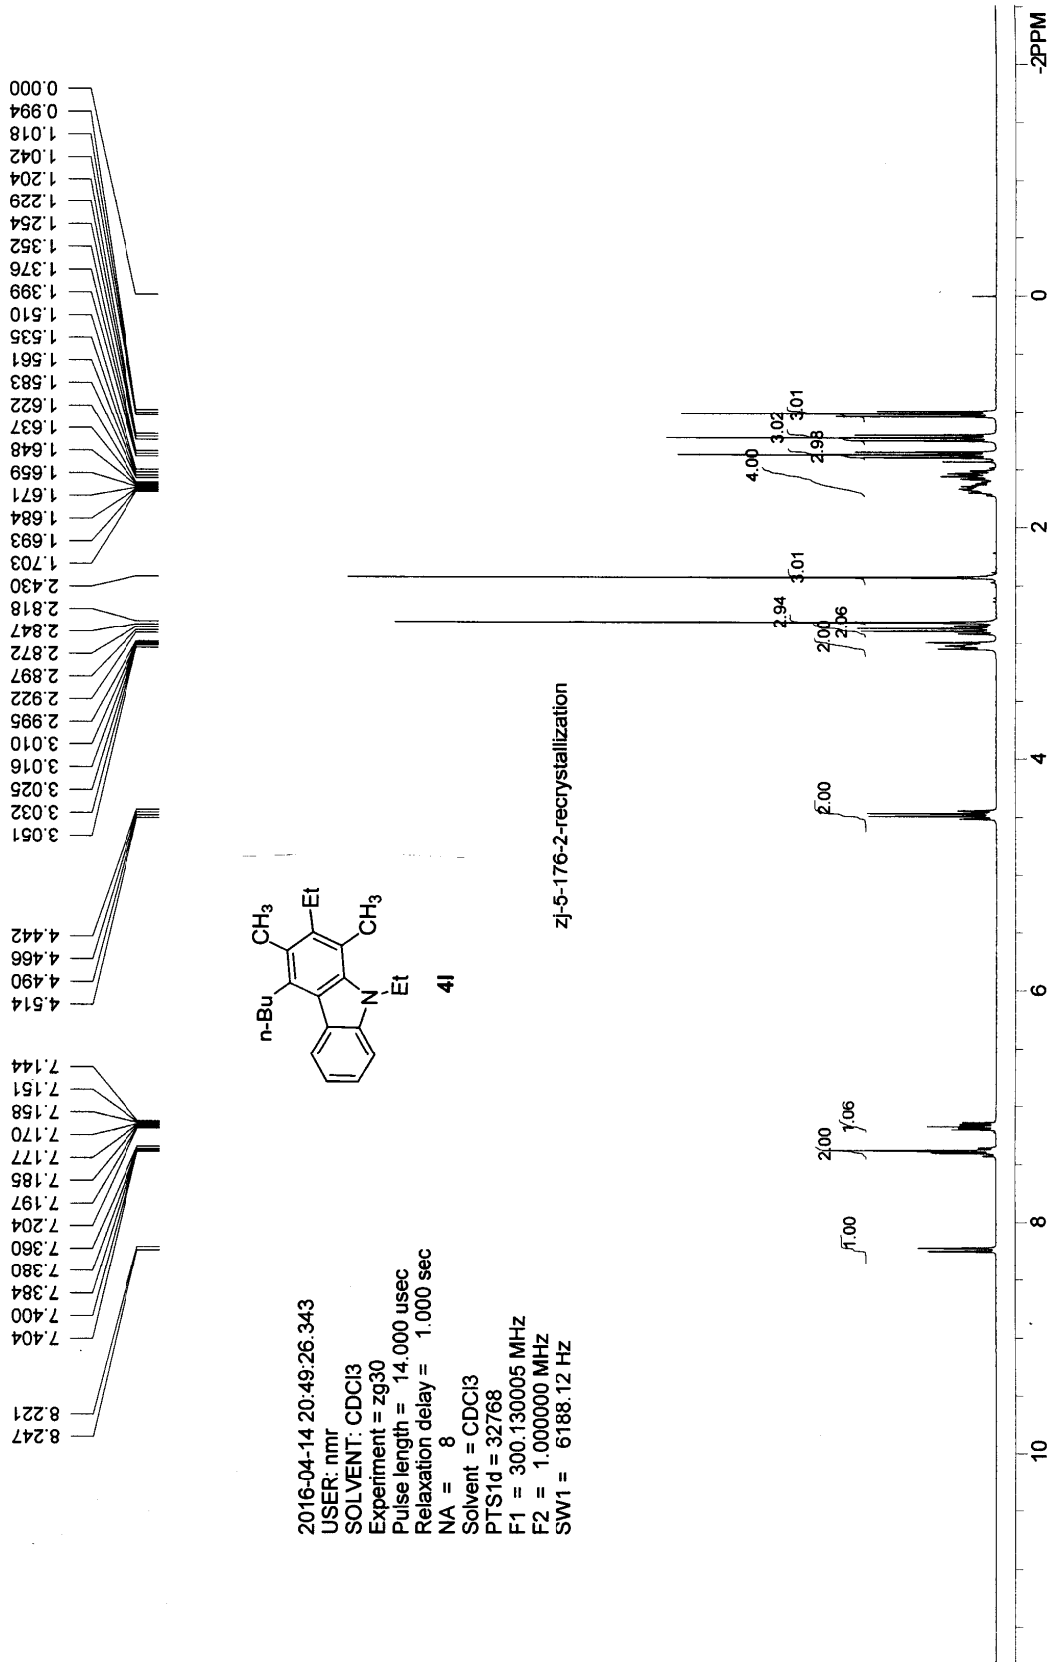

2016-04-16 16:11:13.750  
 USER: nmr  
 SOLVENT: CDCl3  
 Experiment = zgpg30  
 Pulse length = 9.500 usec  
 Relaxation delay = 2.000 sec  
 NA = 775  
 Solvent = CDCl3  
 PTS1d = 32768  
 F1 = 75.467751 MHz  
 F2 = 1.000000 MHz  
 SW1 = 22727.27 Hz

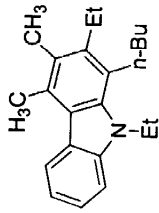

zj-5-176-2-recrystallization

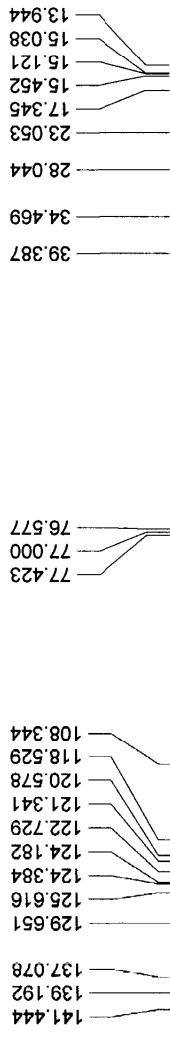

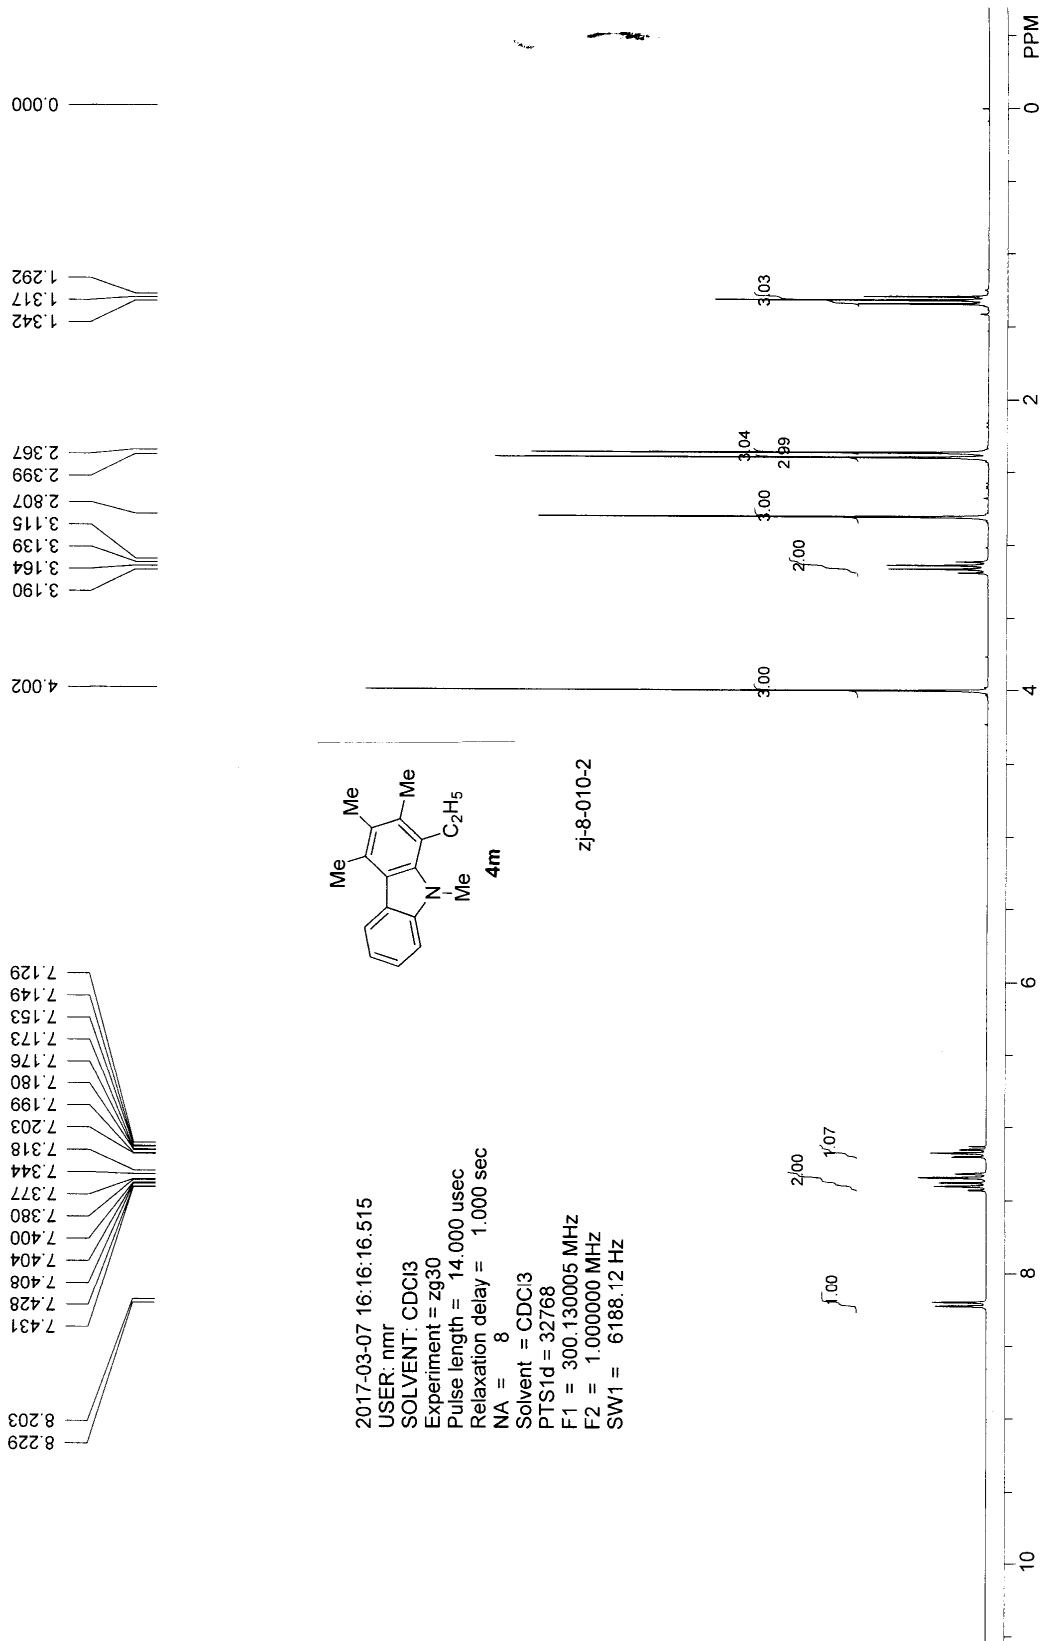

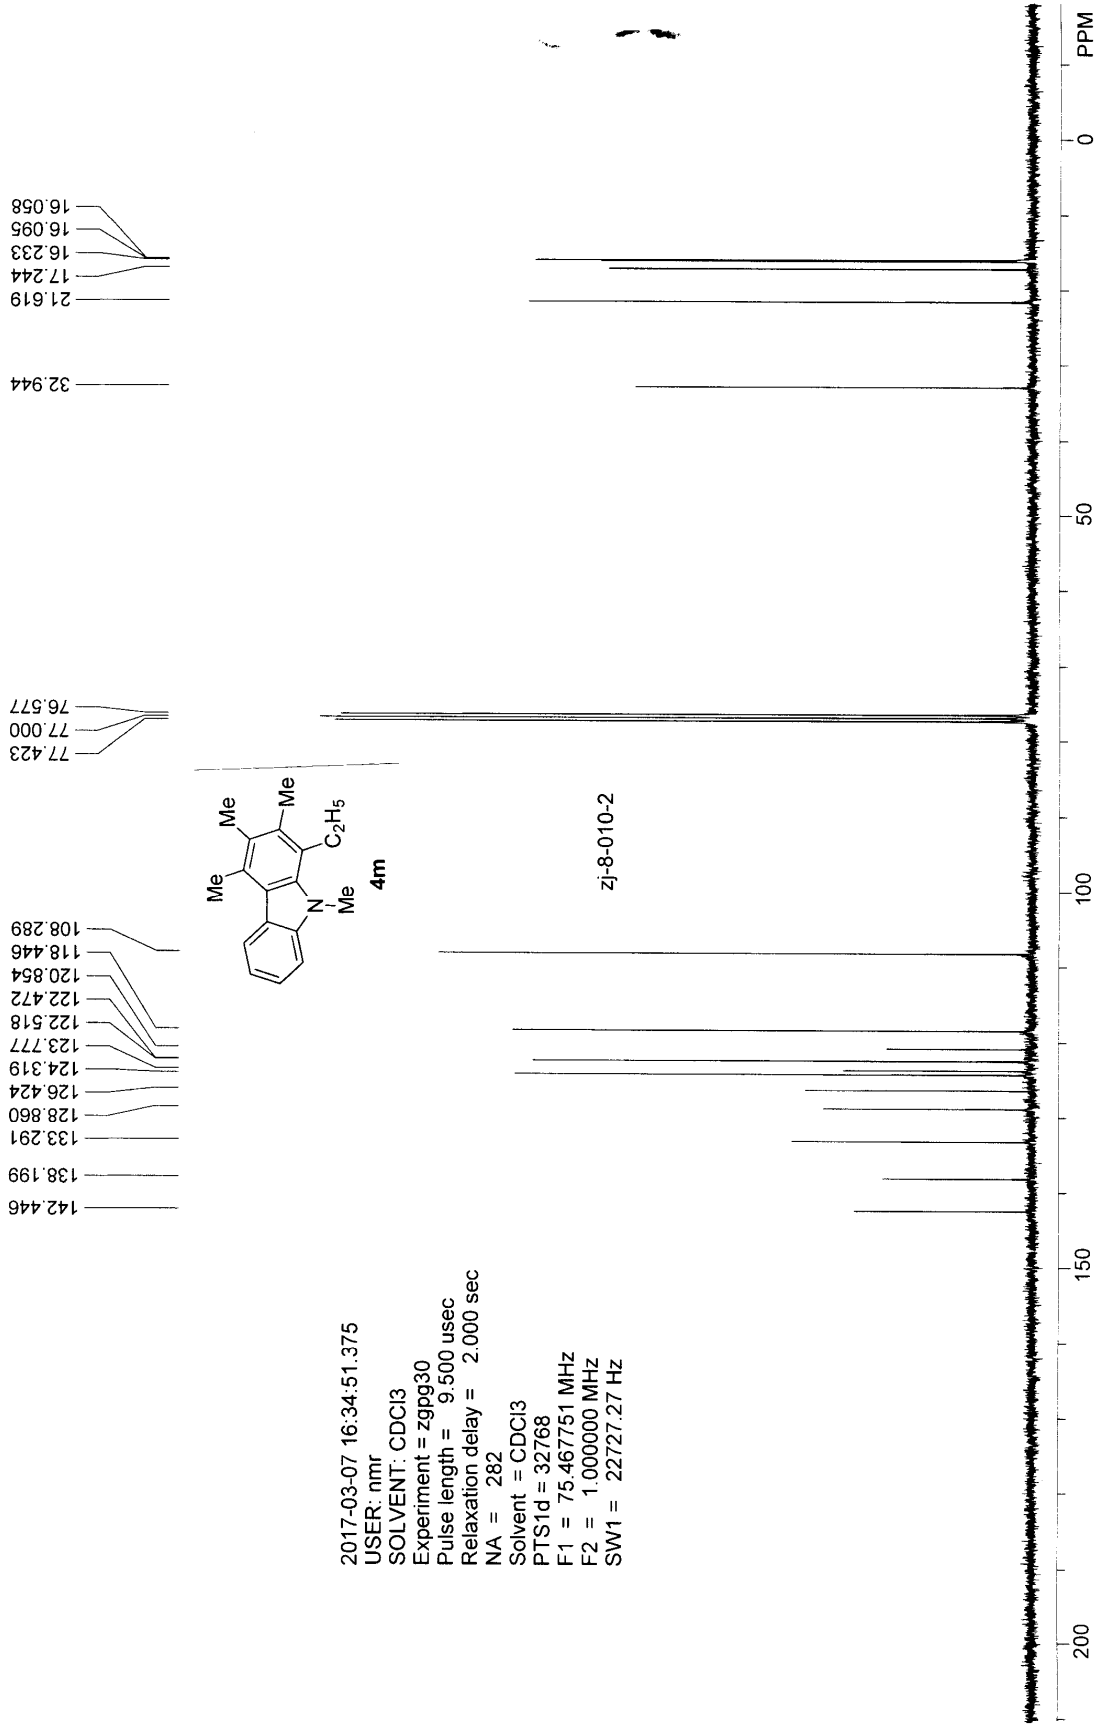

2017-03-07 16:34:51.375  
 USER: nmr  
 SOLVENT: CDCl3  
 Experiment = zgpg30  
 Pulse length = 9.500 usec  
 Relaxation delay = 2.000 sec  
 NA = 282  
 Solvent = CDCl3  
 PTD1d = 32768  
 F1 = 75.467751 MHz  
 F2 = 1.000000 MHz  
 SW1 = 22727.27 Hz

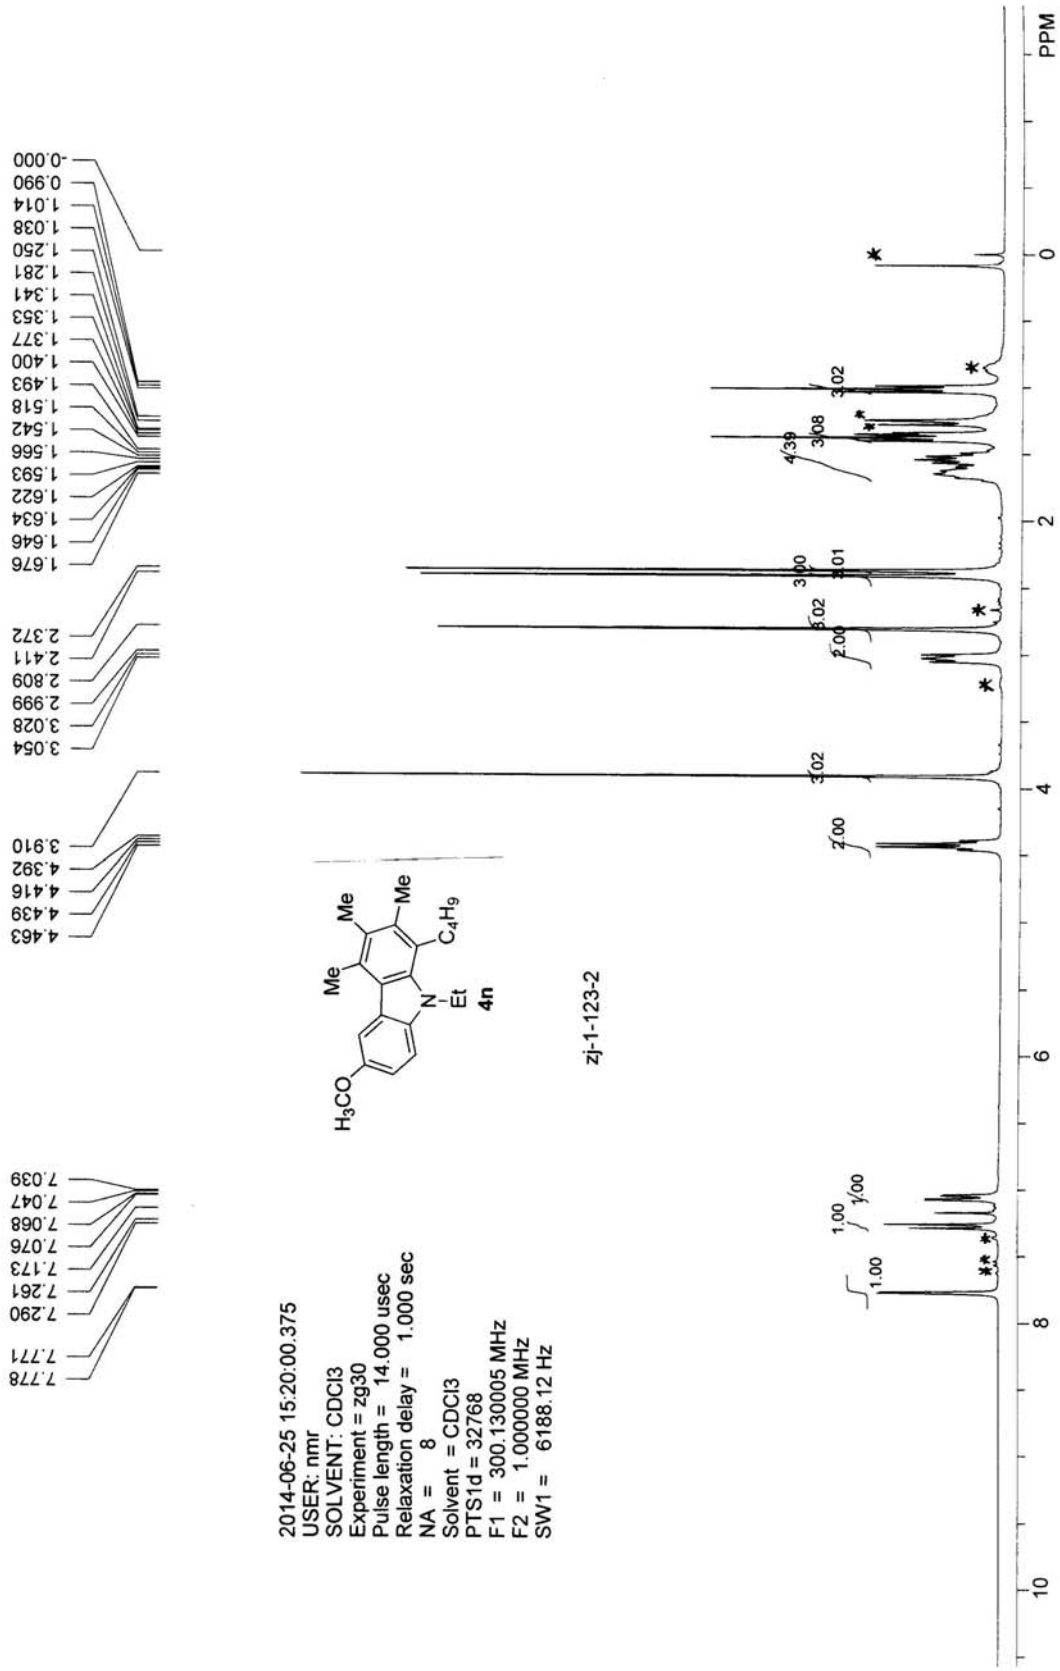



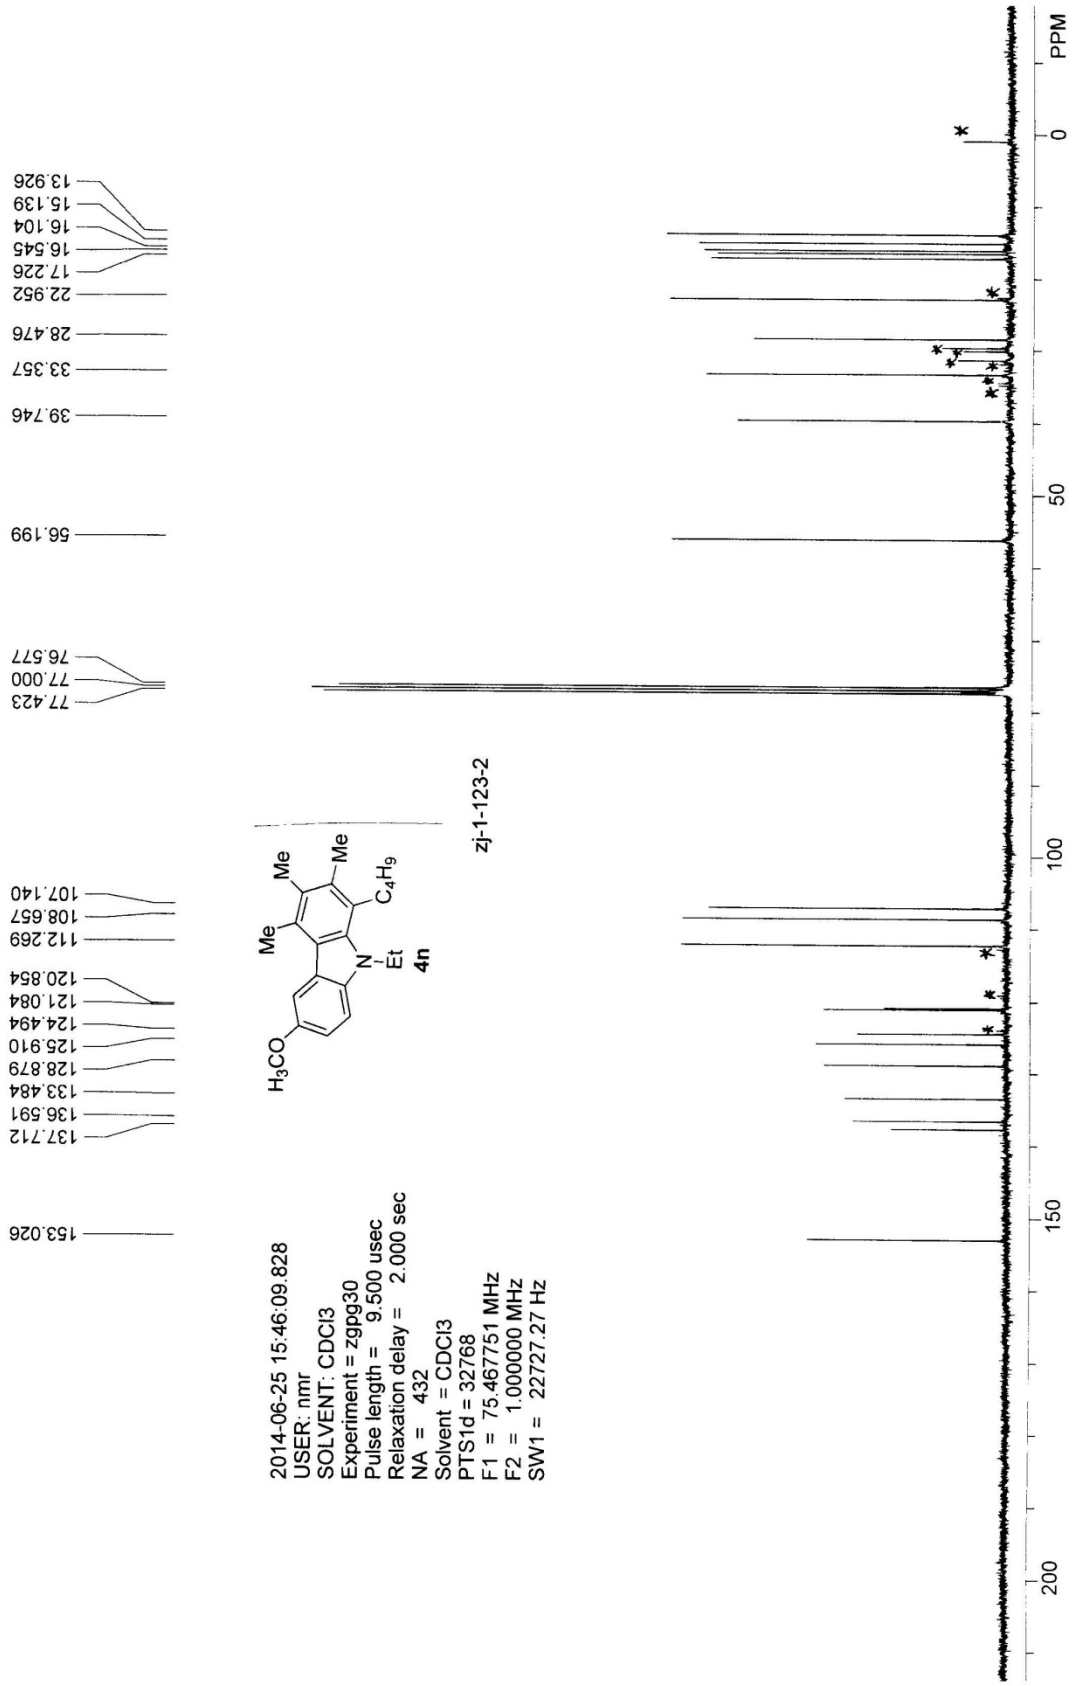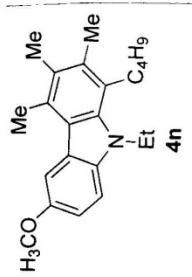

zj-1-123-2

2014-06-25 15:46:09.828  
 USER: nmr  
 SOLVENT: CDCl3  
 Experiment = zgpg30  
 Pulse length = 9.500 usec  
 Relaxation delay = 2.000 sec  
 NA = 432  
 Solvent = CDCl3  
 PTS1d = 32768  
 F1 = 75.467751 MHz  
 F2 = 1.000000 MHz  
 SW1 = 22727.27 Hz

\* impurity

8.130  
8.103  
8.079  
8.052  
7.418  
7.415  
7.396  
7.392  
7.388  
7.384  
7.361  
7.229  
7.226  
7.207  
7.202  
7.198  
7.181  
7.175  
7.094  
6.860  
4.613  
4.589  
4.565  
4.541  
4.346  
4.321  
4.298  
4.274  
3.291  
3.265  
3.237  
3.168  
3.143  
3.116  
2.677  
2.491  
2.460  
2.365  
1.766  
1.734  
1.720  
1.710  
1.699  
1.685  
1.651  
1.629  
1.605  
1.577  
1.527  
1.418  
1.393  
1.369  
1.052  
1.029  
1.005  
-0.000

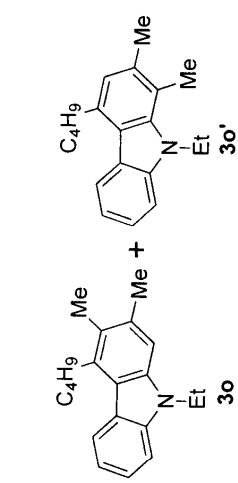

spect, CDCl3,  
 Sat Jun 13 12:51:56 2015  
 USER: nmr  
 SOLVENT:  
 Experiment = zg30  
 Pulse length = 14.000 usec  
 Recycle delay = 1.000 sec  
 NA = 8  
 P1 = 32768  
 F1 = 300.131866 MHz  
 F2 = 1.000000 MHz  
 SW1 = 6188.12 Hz

zj-2-117

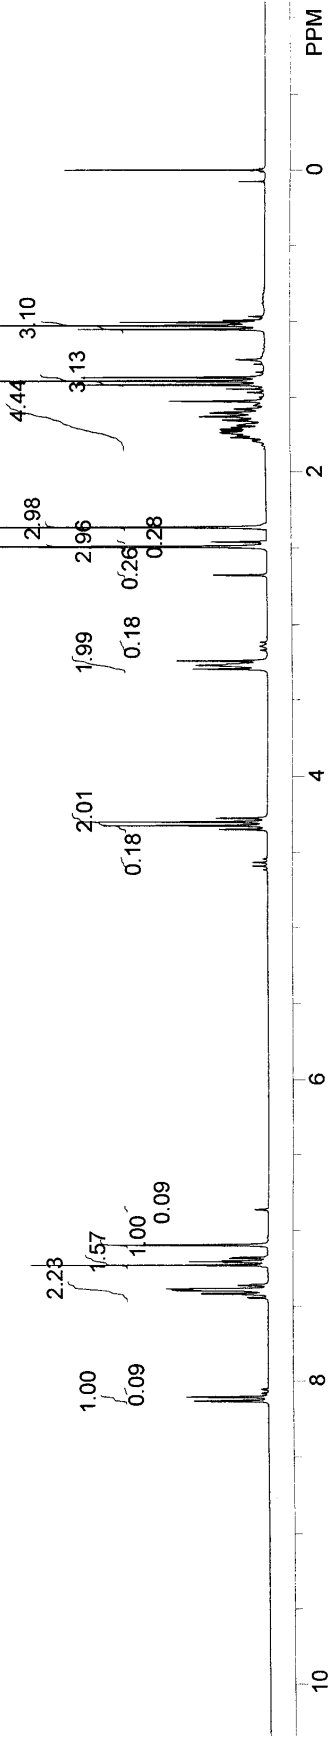

13.647  
14.123  
14.510  
14.784  
15.514  
20.948  
22.259  
23.002  
23.396  
29.709  
30.393  
31.442  
31.992  
33.917  
37.143  
39.875

76.578  
77.000  
77.422

107.191  
108.039  
108.479  
115.758  
118.415  
118.849  
119.342  
122.183  
122.243  
122.995  
123.112  
124.225  
124.449  
124.908  
134.484  
135.019  
135.255  
136.384  
138.556  
139.957

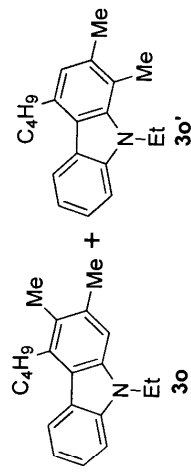

30:30' = 92.8

spect, CDCl3,  
Sun Jun 14 09:33:42 2015  
USER: nmr  
SOLVENT:  
Experiment = zgpg30  
Pulse length = 9.500 usec  
Recycle delay = 2.000 sec  
NA = 3862  
PTS1d = 32768  
F1 = 75.476807 MHz  
F2 = 1.000000 MHz  
SW1 = 22727.27 Hz

zj-2-117

0 PPM  
20  
40  
60  
80  
100  
120  
140  
160
